# Supplementary material for: Multi-omics analysis of MRPL-13 as a tumor-promoting marker from pan-cancer to lung adenocarcinoma
Source: publisher site journal article supplement (doi:10.18632/aging.205104), 2023-10-12
Supplement: Supplementary file [file aging-v15i19-205104-supplementary-material-SD2.pdf]

## SUPPLEMENTARY TABLES

**Supplementary Table 1. Comparison of clinical characteristics of patients with high and low MRPL13 expression.**

| Characteristic                 | Low expression of MRPL13 | High expression of MRPL13 | p       |
|--------------------------------|--------------------------|---------------------------|---------|
| N                              | 267                      | 268                       |         |
| Age, n (%)                     |                          |                           | 0.095   |
| ≤65                            | 119 (23.1%)              | 136 (26.4%)               |         |
| >65                            | 142 (27.5%)              | 119 (23.1%)               |         |
| Gender, n (%)                  |                          |                           | 0.090   |
| Female                         | 153 (28.6%)              | 133 (24.9%)               |         |
| Male                           | 114 (21.3%)              | 135 (25.2%)               |         |
| Race, n (%)                    |                          |                           | 0.565   |
| Asian                          | 4 (0.9%)                 | 3 (0.6%)                  |         |
| Black or African American      | 32 (6.8%)                | 23 (4.9%)                 |         |
| White                          | 204 (43.6%)              | 202 (43.2%)               |         |
| T stage, n (%)                 |                          |                           | < 0.001 |
| T1                             | 111 (20.9%)              | 64 (12%)                  |         |
| T2                             | 123 (23.1%)              | 166 (31.2%)               |         |
| T3                             | 22 (4.1%)                | 27 (5.1%)                 |         |
| T4                             | 9 (1.7%)                 | 10 (1.9%)                 |         |
| N stage, n (%)                 |                          |                           | 0.008   |
| N0                             | 187 (36%)                | 161 (31%)                 |         |
| N1                             | 41 (7.9%)                | 54 (10.4%)                |         |
| N2                             | 27 (5.2%)                | 47 (9.1%)                 |         |
| N3                             | 0 (0%)                   | 2 (0.4%)                  |         |
| M stage, n (%)                 |                          |                           | 0.296   |
| M0                             | 162 (42%)                | 199 (51.6%)               |         |
| M1                             | 8 (2.1%)                 | 17 (4.4%)                 |         |
| Pathologic stage, n (%)        |                          |                           | 0.015   |
| Stage I                        | 164 (31.1%)              | 130 (24.7%)               |         |
| Stage II                       | 56 (10.6%)               | 67 (12.7%)                |         |
| Stage III                      | 34 (6.5%)                | 50 (9.5%)                 |         |
| Stage IV                       | 9 (1.7%)                 | 17 (3.2%)                 |         |
| Primary therapy outcome, n (%) |                          |                           | 0.175   |
| PD                             | 29 (6.5%)                | 42 (9.4%)                 |         |
| SD                             | 18 (4%)                  | 19 (4.3%)                 |         |
| PR                             | 3 (0.7%)                 | 3 (0.7%)                  |         |
| CR                             | 182 (40.8%)              | 150 (33.6%)               |         |
| Smoker, n (%)                  |                          |                           | 0.206   |
| No                             | 43 (8.3%)                | 32 (6.1%)                 |         |
| Yes                            | 217 (41.7%)              | 229 (44%)                 |         |
| OS event, n (%)                |                          |                           | < 0.001 |
| Alive                          | 196 (36.6%)              | 147 (27.5%)               |         |
| Dead                           | 71 (13.3%)               | 121 (22.6%)               |         |
| Age, median (IQR)              | 67 (59, 73)              | 65 (58.5, 71)             | 0.078   |

**Supplementary Table 2. Clinical characteristics of patients with tumor samples participating in immunohistochemistry.**

| <b>Characteristics</b> |      |
|------------------------|------|
| N                      | 50   |
| Age, n (%)             |      |
| <=65                   | 19   |
| >65                    | 31   |
| Age, median (IQR)      | 69.2 |
| Gender                 |      |
| Female                 | 32   |
| Male                   | 18   |
| T stage                |      |
| T1                     | 26   |
| T2                     | 18   |
| T3                     | 4    |
| T4                     | 2    |
| N stage                |      |
| N0                     | 43   |
| N1                     | 7    |
| N2                     | 0    |
| N3                     | 0    |
| M stage                |      |
| M0                     | 50   |
| M1                     | 0    |
| Pathologic stage       |      |
| Stage I                | 32   |
| Stage II               | 12   |
| Stage III              | 6    |
| Stage IV               | 0    |
| Smoker                 |      |
| No                     | 39   |
| Yes                    | 11   |
| OS event               |      |
| Alive                  | 46   |
| Dead                   | 4    |
