# Supplementary material for: Multi-omics analysis of MRPL-13 as a tumor-promoting marker from pan-cancer to lung adenocarcinoma
Source: publisher site journal article supplement (doi:10.18632/aging.205104), 2023-10-12
Supplement: Supplementary file [file aging-v15i19-205104-supplementary-material-SD5.pdf]

## **Supplementary Material 3. Experimental details of qRT-PCR assay, Western blotting analysis, immunohistochemistry (IHC) staining assay, cell viability assay, Transwell assay and flow cytometry assay.**

### **qRT-PCR assay**

Total RNA was extracted using the RNA-Quick Purification kit. cDNA Synthesis reagent was used to reverse transcribe RNA into cDNA. Real-time quantitative PCR (RT-qPCR) was done using the Roche Light Cycler 480 Detection System. All reagents are used according to the manufacturer's instructions. In this study, the relative expression of the MRPL13 were normalized to GAPDH levels, and the relative gene expression was determined by the  $2^{-\Delta\Delta CT}$  method. The primers in qPCR were as follows: GAPDH forward primer: GGTGAAGGTCGGAGTCAAC. GG, and reverse primer: GAGGTCAATGAAGGGGTCATTG; MRPL13 forward primer: CTTGCGATACTGGCTACC, reverse primer: CTTCTGGAATATACTCATCTGG.

### **Western blotting analysis**

Protein in tissue sample was extracted by the mixture of RIPA buffer and PMSF (100:1). The protein concentration of the samples was determined by the BCA protein assay kit. After sodium dodecyl sulfate-polyacrylamide gel electrophoresis, protein was transferred to polyvinylidene fluoride membrane (280 mA, 2 h). After sealing with 5% skim milk for 2 hours, the membrane was incubated with the primary antibody at 4 C overnight. The second antibody was incubated at room temperature (22–25 C) for 2 hours. Reactive protein bands were found using enhanced chemiluminescence (ECL), and the intensity of these membranes was determined using ChemiDoc™ MP Imaging System (Bio-Rad, USA). The antibodies used are as follows: MRPL13 (1:10000, ab190232, Abcam, Cambridge, UK).

### **Immunohistochemistry (IHC) staining assay**

LUAD samples were taken from 50 patients who underwent surgical treatment in Zhejiang People's Hospital from 2020 to 2022. In short, tissue sections were incubated with antibodies against MRPL 13 (10 g/ml, Abcam) overnight, then with secondary antibodies, then stained with DAB, and finally counterstained with hematoxylin.

### **Cell viability assay**

According to the manufacturer's suggestion, CCK-8 reagent was used to test the effect of MRPL13 gene knockout on LUAD cell viability. H1975 cells in the experimental group and the control group were inoculated into 96-well plates at a cell density of  $5 \times 10^3$  per well. After 12 hours, it was changed to a medium containing 10% CCK-8 reagent, incubated in the dark, and then the absorbance at 450 nm was measured by an enzyme-labeled instrument (Synergy LX, BioTek, USA).

### **Transwell assay**

We used Transwell membrane to detect the invasion and migration of LUAD cells. LUAD cells were digested with trypsin, and the same number of cells were inoculated in the upper layer of 24-well chamber with serum-free medium, and the lower layer was the control medium containing 15% serum. At the same time, during the invasion experiment, a layer of Matrigel matrix (Corning, USA) was laid on the bottom of the chamber (0.1ml/24-well plate per hole (the concentration is 200-300  $\mu\text{g}/\text{mL}$ )), and after 24 hours of culture at 37° C and 5% CO<sub>2</sub>, the cells in the chamber were fixed with 4% formaldehyde, stained with 1% crystal violet, and the cells in the upper layer of the chamber were wiped with cotton swabs. Under the microscope, the number of cells entering the chamber was counted in five random areas to evaluate the invasion and migration ability of cells.

### **Flow cytometry assay**

Each group of transfected cells verified by RNA was collected, and related reagents were prepared according to the manufacturer's instructions. Apoptosis was detected by Annexin V-FITC/PI double staining, and cell cycle was analyzed by PI staining. All tests were carried out on a Beckman flow machine. The pictures were visualized with FLOWJO software.

**Supplementary Material 4.  
Intersection list of genes  
related to MRPL13 in BRCA,  
LUAD, HNSC and STAD.**

---

DERL1  
C8orf76  
DCAF13  
POLR2K  
ENY2  
ELOC  
NSMCE2  
TMEM70  
TATDN1  
MTERF3  
DSCC1  
NTAQ1  
NUDCD1  
NDUFB9  
MRPL15  
RBIS  
C8orf33  
COPS5  
MED30  
CYC1  
CYRIB  
MRPS28  
EIF3H  
ZFAND1  
PPIL1  
PTGES3  
EIF3E  
MAD2L1  
RAN  
H2AZ1  
HSPE1  
CACYBP  
UBE2T  
CKS2  
BIRC5  
LRR1  
PSMA4  
CKS1B  
CCT4  
TNXB

---

**Supplementary Material 5. The list of gene mutation rates of cells with high and low expression of MRPL13.**

| <b>Tag</b> | <b>MutCount</b> | <b>1</b>    |
|------------|-----------------|-------------|
| TP53       | 242             | 0.000000667 |
| TTN        | 230             | 0.000728261 |
| CSMD3      | 187             | 0.013909758 |
| ZFHX4      | 153             | 0.005672077 |
| COL11A1    | 99              | 0.022380166 |
| CSMD1      | 98              | 0.029273059 |
| PCDH15     | 96              | 0.004025917 |
| MUC17      | 93              | 0.005182263 |
| PAPPA2     | 87              | 0.001919859 |
| CDH10      | 84              | 0.038470814 |

**Supplementary Material 6. The comprehensive evaluation score of MRPL13 protein between the cancer tissue group and adjacent normal tissue group.**

| Number/<br>cancer | Doctor 1 | Doctor 2 | Doctor 3 | Average     |             | Number/normal | Doctor 1 | Doctor 2 | Doctor 3 | Average     |             |
|-------------------|----------|----------|----------|-------------|-------------|---------------|----------|----------|----------|-------------|-------------|
| 1                 | 6        | 6        | 6        | 6           | 0           | 1             | 3        | 3        | 3        | 3           | 0           |
| 2                 | 5        | 5        | 6        | 5.333333333 | 0.471404521 | 2             | 3        | 4        | 4        | 3.666666667 | 0.471404521 |
| 3                 | 6        | 6        | 5        | 5.666666667 | 0.471404521 | 3             | 3        | 4        | 4        | 3.666666667 | 0.471404521 |
| 4                 | 3        | 2        | 3        | 2.666666667 | 0.471404521 | 4             | 3        | 3        | 4        | 3.333333333 | 0.471404521 |
| 5                 | 8        | 7        | 7        | 7.333333333 | 0.471404521 | 5             | 6        | 5        | 5        | 5.333333333 | 0.471404521 |
| 6                 | 6        | 7        | 7        | 6.666666667 | 0.471404521 | 6             | 6        | 6        | 6        | 6           | 0           |
| 7                 | 7        | 6        | 7        | 6.666666667 | 0.471404521 | 7             | 6        | 6        | 6        | 6           | 0           |
| 8                 | 7        | 7        | 7        | 7           | 0           | 8             | 6        | 6        | 6        | 6           | 0           |
| 9                 | 7        | 7        | 7        | 7           | 0           | 9             | 6        | 7        | 7        | 6.666666667 | 0.471404521 |
| 10                | 3        | 3        | 2        | 2.666666667 | 0.471404521 | 10            | 3        | 2        | 3        | 2.666666667 | 0.471404521 |
| 11                | 3        | 3        | 1        | 2.333333333 | 0.942809042 | 11            | 3        | 3        | 3        | 3           | 0           |
| 12                | 5        | 6        | 6        | 5.666666667 | 0.471404521 | 12            | 1        | 2        | 2        | 1.666666667 | 0.471404521 |
| 13                | 4        | 5        | 6        | 5           | 0.816496581 | 13            | 2        | 3        | 2        | 2.333333333 | 0.471404521 |
| 14                | 7        | 7        | 7        | 7           | 0           | 14            | 3        | 3        | 2        | 2.666666667 | 0.471404521 |
| 15                | 6        | 8        | 7        | 7           | 0.816496581 | 15            | 5        | 5        | 5        | 5           | 0           |
| 16                | 7        | 7        | 7        | 7           | 0           | 16            | 4        | 4        | 5        | 4.333333333 | 0.471404521 |
| 17                | 7        | 7        | 7        | 7           | 0           | 17            | 4        | 3        | 4        | 3.666666667 | 0.471404521 |
| 18                | 7        | 7        | 7        | 7           | 0           | 18            | 4        | 3        | 4        | 3.666666667 | 0.471404521 |
| 19                | 7        | 7        | 7        | 7           | 0           | 19            | 7        | 7        | 7        | 7           | 0           |
| 20                | 5        | 6        | 7        | 6           | 0.816496581 | 20            | 7        | 7        | 8        | 7.333333333 | 0.471404521 |
| 21                | 3        | 3        | 2        | 2.666666667 | 0.471404521 | 21            | 7        | 7        | 7        | 7           | 0           |
| 22                | 1        | 2        | 2        | 1.666666667 | 0.471404521 | 22            | 4        | 5        | 5        | 4.666666667 | 0.471404521 |
| 23                | 2        | 2        | 2        | 2           | 0           | 23            | 7        | 6        | 7        | 6.666666667 | 0.471404521 |
| 24                | 3        | 2        | 2        | 2.333333333 | 0.471404521 | 24            | 3        | 4        | 4        | 3.666666667 | 0.471404521 |
| 25                | 6        | 7        | 8        | 7           | 0.816496581 | 25            | 3        | 4        | 4        | 3.666666667 | 0.471404521 |
| 26                | 7        | 7        | 7        | 7           | 0           | 26            | 3        | 4        | 4        | 3.666666667 | 0.471404521 |
| 27                | 8        | 7        | 7        | 7.333333333 | 0.471404521 | 27            | 1        | 2        | 2        | 1.666666667 | 0.471404521 |
| 28                | 7        | 7        | 7        | 7           | 0           | 28            | 3        | 3        | 3        | 3           | 0           |
| 29                | 7        | 6        | 7        | 6.666666667 | 0.471404521 | 29            | 5        | 6        | 6        | 5.666666667 | 0.471404521 |
| 30                | 7        | 6        | 7        | 6.666666667 | 0.471404521 | 30            | 5        | 6        | 6        | 5.666666667 | 0.471404521 |
| 31                | 7        | 6        | 7        | 6.666666667 | 0.471404521 | 31            | 3        | 5        | 5        | 4.333333333 | 0.942809042 |
| 32                | 7        | 7        | 7        | 7           | 0           | 32            | 7        | 6        | 7        | 6.666666667 | 0.471404521 |
| 33                | 6        | 6        | 7        | 6.333333333 | 0.471404521 | 33            | 7        | 6        | 7        | 6.666666667 | 0.471404521 |
| 34                | 2        | 3        | 3        | 2.666666667 | 0.471404521 | 34            | 3        | 4        | 4        | 3.666666667 | 0.471404521 |
| 35                | 1        | 2        | 3        | 2           | 0.816496581 | 35            | 2        | 2        | 2        | 2           | 0           |
| 36                | 6        | 4        | 5        | 5           | 0.816496581 | 36            | 6        | 7        | 7        | 6.666666667 | 0.471404521 |
| 37                | 5        | 6        | 6        | 5.666666667 | 0.471404521 | 37            | 5        | 6        | 6        | 5.666666667 | 0.471404521 |
| 38                | 4        | 5        | 6        | 5           | 0.816496581 | 38            | 5        | 6        | 6        | 5.666666667 | 0.471404521 |
| 39                | 8        | 7        | 6        | 7           | 0.816496581 | 39            | 7        | 8        | 7        | 7.333333333 | 0.471404521 |
| 40                | 8        | 7        | 6        | 7           | 0.816496581 | 40            | 7        | 9        | 8        | 8           | 0.816496581 |
| 41                | 7        | 8        | 8        | 7.666666667 | 0.471404521 | 41            | 4        | 5        | 5        | 4.666666667 | 0.471404521 |
| 42                | 6        | 8        | 8        | 7.333333333 | 0.942809042 | 42            | 6        | 7        | 7        | 6.666666667 | 0.471404521 |
| 43                | 7        | 8        | 8        | 7.666666667 | 0.471404521 | 43            | 7        | 7        | 7        | 7           | 0           |
| 44                | 7        | 8        | 8        | 7.666666667 | 0.471404521 | 44            | 7        | 7        | 7        | 7           | 0           |
| 45                | 7        | 9        | 8        | 8           | 0.816496581 | 45            | 7        | 7        | 7        | 7           | 0           |
| 46                | 3        | 2        | 3        | 2.666666667 | 0.471404521 | 46            | 2        | 3        | 2        | 2.333333333 | 0.471404521 |
| 47                | 2        | 2        | 4        | 2.666666667 | 0.942809042 | 47            | 3        | 3        | 3        | 3           | 0           |
| 48                | 3        | 4        | 6        | 4.333333333 | 1.247219129 | 48            | 3        | 3        | 3        | 3           | 0           |
| 49                | 8        | 6        | 5        | 6.333333333 | 1.247219129 | 49            | 3        | 3        | 3        | 3           | 0           |
| 50                | 9        | 7        | 7        | 7.666666667 | 0.942809042 | 50            | 9        | 8        | 9        | 8.666666667 | 0.471404521 |
