# Supplementary material for: Multi-omics analysis of MRPL-13 as a tumor-promoting marker from pan-cancer to lung adenocarcinoma
Source: Aging (Albany NY). 2023 Oct 12;15(19):10640–80. doi: 10.18632/aging.205104 (PMC10599762; doi:10.18632/aging.205104)
Supplement: Supplementary Material 1 [file aging-15-205104-s003.xlsx]

## Sheet: Sheet 1
Supplementary Material 1. Differentially expressed genes in patients with high and low expression of MRPL13 (median expression is the boundary).
gene_name	gene_id	gene_biotype	baseMean	log2FoldChange	lfcSE	stat	pvalue	padj
DEFA5	ENSG00000164816	protein_coding	2.85208	4.53019	0.780072	5.8074	6.3449e-09	3.48347e-08
CPLX2	ENSG00000145920	protein_coding	833.487	3.78399	0.318592	11.8772	1.5546e-32	2.84512e-30
SPAG11B	ENSG00000164871	protein_coding	2.16798	3.70102	0.789019	4.69066	2.7233e-06	9.77408e-06
NTS	ENSG00000133636	protein_coding	541.474	3.60961	0.275203	13.1162	2.65892e-39	1.27148e-36
VGLL2	ENSG00000170162	protein_coding	6.51865	3.36642	0.412761	8.15586	3.46694e-16	5.75305e-15
LINC01419	ENSG00000253898	lncRNA	18.9097	3.2946	0.473684	6.95526	3.51912e-12	3.16678e-11
SP9	ENSG00000217236	protein_coding	8.7269	3.21861	0.368671	8.73029	2.54014e-18	5.9424e-17
SPANXC	ENSG00000198573	protein_coding	2.12802	3.17378	0.545725	5.81572	6.03749e-09	3.32672e-08
LINC01414	ENSG00000253554	lncRNA	2.78568	3.11166	0.421078	7.38976	1.47098e-13	1.63871e-12
CASP14	ENSG00000105141	protein_coding	24.8584	3.10824	0.413009	7.52584	5.23825e-14	6.21878e-13
DPYSL5	ENSG00000157851	protein_coding	12.9787	3.10653	0.290299	10.7011	1.00535e-26	8.29495e-25
MAGEA9B	ENSG00000267978	protein_coding	8.17779	3.08533	0.575486	5.36126	8.26417e-08	3.81645e-07
DEFA8P	ENSG00000223629	unprocessed_pseudogene	1.89025	3.06918	0.671888	4.56799	4.92414e-06	1.69284e-05
AC106875.1	ENSG00000228496	lncRNA	5.92705	3.01644	0.368678	8.18177	2.79714e-16	4.73703e-15
MAGEB2	ENSG00000099399	protein_coding	35.849	3.00323	0.435623	6.89411	5.42038e-12	4.74376e-11
MAGEA4	ENSG00000147381	protein_coding	158.389	2.92163	0.525063	5.56434	2.63149e-08	1.31256e-07
IRX4-AS1	ENSG00000249116	lncRNA	1.29739	2.89292	0.540793	5.3494	8.82485e-08	4.06316e-07
AL161658.1	ENSG00000280229	TEC	3.53673	2.88765	0.463704	6.22735	4.74378e-10	3.0956e-09
ADAM6	ENSG00000271968	transcribed_unprocessed_pseudogene	1.84733	2.88148	0.534621	5.38977	7.05486e-08	3.29632e-07
LIN28A	ENSG00000131914	protein_coding	10.2156	2.80061	0.301684	9.28324	1.64394e-20	5.41151e-19
RIPPLY2	ENSG00000203877	protein_coding	5.70334	2.78514	0.373522	7.45645	8.88869e-14	1.02303e-12
ERVH48-1	ENSG00000233056	lncRNA	103.714	2.74603	0.212014	12.9521	2.2867e-38	9.68515e-36
SLC6A15	ENSG00000072041	protein_coding	68.5797	2.72658	0.288326	9.4566	3.18111e-21	1.1615e-19
DEFA9P	ENSG00000233238	unprocessed_pseudogene	2.0065	2.7092	0.668828	4.05066	5.10729e-05	0.000148181
PAQR9	ENSG00000188582	protein_coding	2.86907	2.70133	0.381103	7.08818	1.35891e-12	1.30188e-11
HOXD13	ENSG00000128714	protein_coding	14.7767	2.65776	0.408725	6.50256	7.89632e-11	5.82653e-10
MAGEA8	ENSG00000156009	protein_coding	13.8697	2.6575	0.238663	11.135	8.47907e-29	9.04271e-27
HOXD11	ENSG00000128713	protein_coding	14.7622	2.6546	0.366936	7.2345	4.67264e-13	4.8225e-12
AC026336.3	ENSG00000276122	lncRNA	23.4736	2.63528	0.471203	5.59268	2.23595e-08	1.12741e-07
MLXP1	ENSG00000226539	processed_pseudogene	11.2831	2.59577	0.226791	11.4456	2.47337e-30	3.51425e-28
INSM1	ENSG00000173404	protein_coding	50.1049	2.59308	0.228254	11.3605	6.57606e-30	8.62686e-28
COL2A1	ENSG00000139219	protein_coding	124.706	2.50567	0.246741	10.1551	3.14628e-24	1.8148e-22
AC244107.1	ENSG00000226141	unprocessed_pseudogene	1.89052	2.50262	0.549832	4.55161	5.32371e-06	1.82176e-05
TAC1	ENSG00000006128	protein_coding	18.0294	2.49643	0.400442	6.23418	4.54164e-10	2.97329e-09
H19	ENSG00000130600	lncRNA	3114.96	2.49588	0.207916	12.0042	3.37518e-33	6.73099e-31
DPPA2	ENSG00000163530	protein_coding	2.26553	2.47711	0.735045	3.37001	0.000751666	0.00176523
LIN28B	ENSG00000187772	protein_coding	27.216	2.46574	0.474144	5.2004	1.98863e-07	8.6433e-07
SPAG11A	ENSG00000178287	protein_coding	0.664808	2.46031	0.870651	2.82582	0.00471591	0.00951916
CTCFL	ENSG00000124092	protein_coding	7.14261	2.4215	0.255801	9.46634	2.89817e-21	1.0696e-19
ESX1	ENSG00000123576	protein_coding	1.08237	2.3826	0.542407	4.39264	1.11984e-05	3.64401e-05
LINC02178	ENSG00000261092	lncRNA	4.54203	2.37155	0.396013	5.98857	2.11692e-09	1.24942e-08
NEUROD4	ENSG00000123307	protein_coding	0.785732	2.3697	0.616066	3.84651	0.000119811	0.000325608
CALB1	ENSG00000104327	protein_coding	72.1231	2.35402	0.212293	11.0885	1.42582e-28	1.48152e-26
KLK12	ENSG00000186474	protein_coding	885.726	2.34764	0.29872	7.859	3.8722e-15	5.47029e-14
F2	ENSG00000180210	protein_coding	32.6308	2.34146	0.286048	8.18556	2.7105e-16	4.59556e-15
AC114786.2	ENSG00000250612	processed_pseudogene	3.45112	2.33293	0.53	4.40176	1.07375e-05	3.50601e-05
LINC01606	ENSG00000253301	lncRNA	7.07753	2.3077	0.307669	7.5006	6.35284e-14	7.45641e-13
TLX3	ENSG00000164438	protein_coding	1.77912	2.30756	0.419986	5.49437	3.92111e-08	1.90122e-07
SPX	ENSG00000134548	protein_coding	122.893	2.29563	0.212867	10.7844	4.08092e-27	3.5516e-25
LINC02525	ENSG00000230269	lncRNA	4.64373	2.28075	0.378379	6.02769	1.6632e-09	9.99811e-09
TGIF2LX	ENSG00000153779	protein_coding	2.00444	2.28062	0.58207	3.91812	8.92406e-05	0.000248013
IGFBP1	ENSG00000146678	protein_coding	59.1001	2.28032	0.241343	9.44849	3.43766e-21	1.248e-19
CALML3	ENSG00000178363	protein_coding	55.8224	2.27946	0.259073	8.79854	1.3861e-18	3.38719e-17
KLK5	ENSG00000167754	protein_coding	54.171	2.27339	0.28995	7.84062	4.4831e-15	6.25777e-14
CTAG2	ENSG00000126890	protein_coding	35.1173	2.26961	0.539228	4.20899	2.56516e-05	7.84363e-05
HMX2	ENSG00000188816	protein_coding	3.13507	2.2658	0.316233	7.16497	7.78064e-13	7.74962e-12
G6PC	ENSG00000131482	protein_coding	4.3326	2.25899	0.380095	5.94321	2.79488e-09	1.6201e-08
CALML5	ENSG00000178372	protein_coding	48.1067	2.24901	0.332384	6.76629	1.32125e-11	1.09604e-10
DEFA6	ENSG00000164822	protein_coding	0.697085	2.2482	0.562802	3.99466	6.47862e-05	0.000184454
ZMAT4	ENSG00000165061	protein_coding	73.5646	2.23744	0.28016	7.98627	1.39085e-15	2.10388e-14
KRTAP9-12P	ENSG00000248807	unprocessed_pseudogene	0.769474	2.22828	0.597149	3.73153	0.000190317	0.000499662
DLX2	ENSG00000115844	protein_coding	4.42728	2.21442	0.225719	9.8105	1.01461e-22	4.70016e-21
SCG3	ENSG00000104112	protein_coding	56.3075	2.21316	0.185394	11.9376	7.53383e-33	1.42572e-30
TEX19	ENSG00000182459	protein_coding	9.7301	2.2125	0.199781	11.0746	1.6656e-28	1.71801e-26
AC055717.2	ENSG00000261650	lncRNA	5.42698	2.20408	0.522129	4.22134	2.42853e-05	7.46072e-05
CPN1	ENSG00000120054	protein_coding	5.37152	2.18785	0.472285	4.63249	3.61301e-06	1.27139e-05
LINC02037	ENSG00000238097	lncRNA	8.60251	2.18684	0.34153	6.40306	1.52292e-10	1.07658e-09
SPANXB1	ENSG00000227234	protein_coding	4.7246	2.18675	0.396023	5.52178	3.3559e-08	1.64655e-07
IGF2BP1	ENSG00000159217	protein_coding	439.796	2.18613	0.261068	8.37377	5.58022e-17	1.04227e-15
DSCR8	ENSG00000198054	lncRNA	13.9319	2.1836	0.429711	5.08155	3.74368e-07	1.54948e-06
NR0B1	ENSG00000169297	protein_coding	269.314	2.17675	0.414738	5.2485	1.5334e-07	6.79217e-07
RHCG	ENSG00000140519	protein_coding	66.9458	2.17542	0.207928	10.4624	1.28602e-25	8.92229e-24
AFP	ENSG00000081051	protein_coding	14.63	2.17243	0.284497	7.63603	2.24016e-14	2.82563e-13
PRDM9	ENSG00000164256	protein_coding	3.42102	2.1578	0.41821	5.1596	2.47479e-07	1.05756e-06
LCN15	ENSG00000177984	protein_coding	11.9913	2.15644	0.319413	6.75125	1.46582e-11	1.20763e-10
AF279873.3	ENSG00000253642	lncRNA	5.05595	2.14235	0.496133	4.31809	1.57385e-05	4.98201e-05
MIR7-3HG	ENSG00000176840	lncRNA	2.28581	2.12812	0.309055	6.88588	5.74306e-12	5.00795e-11
AC090192.2	ENSG00000253227	lncRNA	5.83699	2.1249	0.244149	8.7033	3.22366e-18	7.43583e-17
SPANXD	ENSG00000196406	protein_coding	1.41559	2.1097	0.593236	3.55625	0.000376185	0.000934045
AL031658.2	ENSG00000278012	lncRNA	0.812305	2.10657	0.511853	4.11558	3.86214e-05	0.000114444
PNMA6F	ENSG00000225110	protein_coding	1.50786	2.10642	0.46817	4.49927	6.81878e-06	2.29626e-05
AC004704.1	ENSG00000249815	lncRNA	3.01752	2.09528	0.346266	6.05109	1.43867e-09	8.72621e-09
LINC00871	ENSG00000258700	lncRNA	6.3781	2.0942	0.357351	5.86035	4.61902e-09	2.59267e-08
U8	ENSG00000239148	snoRNA	9.85787	2.09253	0.483509	4.3278	1.50606e-05	4.78925e-05
LINC01475	ENSG00000257582	lncRNA	0.935231	2.06344	0.526364	3.92017	8.84871e-05	0.000246073
PAH	ENSG00000171759	protein_coding	198.188	2.06284	0.252752	8.16151	3.30865e-16	5.51922e-15
ABCC2	ENSG00000023839	protein_coding	1072.39	2.05527	0.22397	9.17652	4.45248e-20	1.36748e-18
AC012213.1	ENSG00000253477	lncRNA	11.1991	2.05085	0.299245	6.8534	7.21166e-12	6.19265e-11
AC125616.1	ENSG00000256008	lncRNA	1.15791	2.03194	0.359874	5.64626	1.63972e-08	8.44096e-08
RIMS2	ENSG00000176406	protein_coding	127.62	2.03144	0.216438	9.38576	6.24663e-21	2.17712e-19
CGA	ENSG00000135346	protein_coding	84.8202	2.0234	0.345305	5.85976	4.63541e-09	2.60121e-08
LINC02008	ENSG00000239440	lncRNA	1.35251	2.01498	0.523169	3.85148	0.000117406	0.000319539
BNIP3P6	ENSG00000257356	processed_pseudogene	1.52325	2.01358	0.643864	3.12734	0.00176393	0.00387252
AC091133.3	ENSG00000250838	lncRNA	1.27006	2.00762	0.626507	3.20446	0.00135314	0.00303265
PNPLA5	ENSG00000100341	protein_coding	10.4419	2.00045	0.298255	6.70719	1.98409e-11	1.60255e-10
AP000907.3	ENSG00000271025	processed_pseudogene	1.20014	-2.00037	0.303207	-6.59738	4.18484e-11	3.21542e-10
THSD4-AS1	ENSG00000259964	lncRNA	2.05576	-2.00064	0.318422	-6.28298	3.32138e-10	2.22452e-09
AC009554.1	ENSG00000259564	lncRNA	0.799139	-2.00089	0.483848	-4.13536	3.54393e-05	0.000105719
GAPDHP39	ENSG00000239207	processed_pseudogene	3.62004	-2.00113	0.23931	-8.36208	6.16201e-17	1.14564e-15
AC022469.1	ENSG00000258419	lncRNA	0.466388	-2.00146	1.0574	-1.89281	0.0583829	0.0920058
AL139404.1	ENSG00000223027	snoRNA	0.823152	-2.0015	0.469951	-4.25894	2.05397e-05	6.38055e-05
AC009102.3	ENSG00000279764	TEC	0.57335	-2.00193	0.440443	-4.54526	5.48684e-06	1.87381e-05
ATP5PBP7	ENSG00000261424	processed_pseudogene	1.54067	-2.00239	0.323229	-6.19497	5.82974e-10	3.75033e-09
RN7SL220P	ENSG00000266467	misc_RNA	2.26899	-2.00378	0.319434	-6.27291	3.54372e-10	2.36241e-09
Z99758.1	ENSG00000235575	lncRNA	1.21547	-2.0041	0.355838	-5.63206	1.78066e-08	9.11903e-08
Y_RNA	ENSG00000202459	misc_RNA	0.626331	-2.00441	0.470993	-4.25572	2.0838e-05	6.4687e-05
Y_RNA	ENSG00000207401	misc_RNA	0.608191	-2.00455	0.614901	-3.25996	0.00111429	0.00253627
EIF5P1	ENSG00000215319	processed_pseudogene	2.52573	-2.0048	0.266573	-7.52064	5.45087e-14	6.45053e-13
RNU1-28P	ENSG00000206588	snRNA	0.81491	-2.00583	0.651434	-3.0791	0.00207629	0.00449678
MTND1P34	ENSG00000225514	transcribed_processed_pseudogene	0.765751	-2.00598	0.486098	-4.12669	3.68022e-05	0.000109447
AP003025.1	ENSG00000237654	lncRNA	1.66441	-2.00624	0.401846	-4.99257	5.95797e-07	2.38576e-06
RNU7-11P	ENSG00000252796	snRNA	1.18538	-2.0068	0.419965	-4.7785	1.76607e-06	6.51574e-06
AC109446.4	ENSG00000279490	TEC	2.33371	-2.00697	0.271487	-7.39249	1.441e-13	1.60876e-12
AL122001.1	ENSG00000225779	processed_pseudogene	2.08944	-2.00702	0.262417	-7.64821	2.03802e-14	2.58587e-13
AL022323.2	ENSG00000279085	lncRNA	3.48249	-2.00732	0.210764	-9.52402	1.66612e-21	6.33837e-20
RNU6-767P	ENSG00000206859	snRNA	3.41107	-2.0079	0.248931	-8.0661	7.25797e-16	1.15113e-14
AP001767.1	ENSG00000254522	processed_pseudogene	0.809987	-2.00804	0.476127	-4.21744	2.47094e-05	7.57638e-05
PCCA-AS1	ENSG00000234650	lncRNA	4.93128	-2.00834	0.206462	-9.72739	2.30429e-22	1.01361e-20
SNX29P2	ENSG00000271699	transcribed_unprocessed_pseudogene	1.10421	-2.00844	0.282989	-7.09724	1.27274e-12	1.22514e-11
SHANK2-AS2	ENSG00000236262	lncRNA	2.193	-2.0085	0.255747	-7.85346	4.04725e-15	5.69587e-14
SDHCP1	ENSG00000264444	processed_pseudogene	0.761547	-2.0099	0.494364	-4.06562	4.79047e-05	0.000139608
RNU6-331P	ENSG00000207455	snRNA	0.849774	-2.01155	0.677872	-2.96745	0.00300285	0.00630364
TRAJ40	ENSG00000211849	TR_J_gene	0.986029	-2.01161	0.470301	-4.27728	1.8919e-05	5.91636e-05
AL133406.1	ENSG00000216639	processed_pseudogene	1.97126	-2.0118	0.234742	-8.57028	1.03229e-17	2.18923e-16
ATP11AUN	ENSG00000197595	lncRNA	12.0427	-2.0122	0.256183	-7.85456	4.01176e-15	5.65487e-14
AC112512.1	ENSG00000214773	lncRNA	5.80097	-2.01222	0.204785	-9.82601	8.69958e-23	4.0725e-21
AL354861.3	ENSG00000268926	lncRNA	2.14598	-2.01246	0.209084	-9.62512	6.26333e-22	2.55076e-20
TRAJ26	ENSG00000211863	TR_J_gene	0.730677	-2.0135	0.478512	-4.20783	2.57838e-05	7.87863e-05
RNU7-73P	ENSG00000239105	snRNA	0.524716	-2.01365	1.13346	-1.77655	0.0756426	0.115656
RN7SL846P	ENSG00000242818	misc_RNA	1.01882	-2.01368	0.421859	-4.77335	1.81185e-06	6.67137e-06
AC103853.2	ENSG00000254141	lncRNA	2.37863	-2.01372	0.345469	-5.82895	5.57778e-09	3.09373e-08
AL589990.1	ENSG00000228086	lncRNA	1.63758	-2.01372	0.323972	-6.21573	5.10864e-10	3.32102e-09
Y_RNA	ENSG00000202470	misc_RNA	1.42254	-2.01373	0.358515	-5.61686	1.94462e-08	9.89825e-08
RNY1P10	ENSG00000200138	misc_RNA	0.720898	-2.01384	0.55758	-3.61175	0.000304136	0.000769065
RNU6-1215P	ENSG00000207170	snRNA	0.88523	-2.01401	0.272224	-7.39836	1.37873e-13	1.54446e-12
AC091117.2	ENSG00000259418	lncRNA	1.07639	-2.01411	0.297467	-6.77087	1.2801e-11	1.06389e-10
H3P45	ENSG00000227211	processed_pseudogene	1.0599	-2.01483	0.395664	-5.09229	3.53769e-07	1.47008e-06
RNA5SP227	ENSG00000251993	rRNA_pseudogene	0.847037	-2.01498	0.490897	-4.10468	4.04867e-05	0.000119565
SHLD2P2	ENSG00000259096	processed_pseudogene	4.11933	-2.01509	0.24609	-8.18842	2.64672e-16	4.49427e-15
RPL21P32	ENSG00000224019	processed_pseudogene	2.27197	-2.01613	0.255461	-7.89212	2.97096e-15	4.26758e-14
AC073571.1	ENSG00000258225	lncRNA	0.605284	-2.0165	0.525506	-3.83725	0.000124418	0.000337139
TTC21B-AS1	ENSG00000224490	lncRNA	5.69669	-2.0167	0.202447	-9.9616	2.24413e-23	1.14889e-21
TRAJ11	ENSG00000211878	TR_J_gene	0.939771	-2.01811	0.412338	-4.89431	9.86496e-07	3.80333e-06
COL18A1-AS1	ENSG00000183535	lncRNA	3.7145	-2.01851	0.237907	-8.48446	2.16726e-17	4.33569e-16
RN7SL443P	ENSG00000241229	misc_RNA	0.691481	-2.01871	0.529259	-3.81421	0.00013662	0.000367583
AC009145.1	ENSG00000260479	lncRNA	1.66056	-2.01877	0.276517	-7.30071	2.86263e-13	3.04635e-12
AL512444.1	ENSG00000225952	lncRNA	0.877395	-2.01882	0.404462	-4.99136	5.99546e-07	2.39991e-06
CFAP20DC-AS1	ENSG00000242428	lncRNA	1.54632	-2.02039	0.344265	-5.86871	4.39202e-09	2.4718e-08
NHS-AS1	ENSG00000230020	lncRNA	2.32491	-2.02061	0.299447	-6.7478	1.50105e-11	1.2346e-10
AL365271.1	ENSG00000226249	lncRNA	0.740628	-2.02129	0.621217	-3.25375	0.00113891	0.00258759
MTND5P16	ENSG00000243658	unprocessed_pseudogene	0.4855	-2.0213	0.869072	-2.32582	0.0200282	0.0353576
THUMPD3P1	ENSG00000248711	unprocessed_pseudogene	1.13309	-2.02144	0.470072	-4.30028	1.70586e-05	5.37502e-05
AL451062.2	ENSG00000233674	processed_pseudogene	1.07579	-2.02291	0.393211	-5.14458	2.68113e-07	1.13763e-06
RNU2-63P	ENSG00000222724	snRNA	2.18129	-2.02378	0.36175	-5.59441	2.21374e-08	1.11684e-07
UBE2V2P2	ENSG00000267463	processed_pseudogene	0.580732	-2.0239	0.624976	-3.23836	0.00120219	0.00271915
MTND2P32	ENSG00000254090	processed_pseudogene	0.851278	-2.02392	0.39447	-5.13073	2.88627e-07	1.2169e-06
TRAJ29	ENSG00000211860	TR_J_gene	0.610977	-2.02437	0.637246	-3.17675	0.00148935	0.00331405
AC008937.2	ENSG00000237705	lncRNA	3.58139	-2.02514	0.240362	-8.42536	3.59639e-17	6.93276e-16
ARF1P2	ENSG00000213137	processed_pseudogene	2.22595	-2.02591	0.269786	-7.50933	5.94298e-14	6.99567e-13
MIR920	ENSG00000216192	miRNA	0.711892	-2.02626	0.601551	-3.36838	0.000756103	0.00177471
AC091231.2	ENSG00000259682	lncRNA	2.32312	-2.02875	0.263378	-7.7028	1.33112e-14	1.73447e-13
RN7SL69P	ENSG00000240533	misc_RNA	0.547603	-2.02909	0.576362	-3.5205	0.000430727	0.00105807
AC008474.1	ENSG00000267557	lncRNA	0.921143	-2.02982	0.380382	-5.33627	9.48798e-08	4.34551e-07
AC130462.2	ENSG00000212445	snoRNA	0.844484	-2.03047	0.39029	-5.20247	1.96661e-07	8.55261e-07
AC002075.1	ENSG00000225898	processed_pseudogene	0.865382	-2.03201	0.420666	-4.83045	1.36223e-06	5.12444e-06
AC064799.2	ENSG00000260586	lncRNA	1.43894	-2.03253	0.323405	-6.28478	3.2832e-10	2.2016e-09
MIR1207	ENSG00000221176	miRNA	0.715574	-2.03293	0.439046	-4.63033	3.65082e-06	1.28357e-05
MTND5P20	ENSG00000238256	processed_pseudogene	1.02127	-2.03314	0.382247	-5.31891	1.04393e-07	4.74556e-07
AGBL1	ENSG00000273540	protein_coding	3.81308	-2.03315	0.235493	-8.6336	5.94517e-18	1.31343e-16
AC009464.1	ENSG00000278475	lncRNA	3.95965	-2.03333	0.207865	-9.78198	1.34556e-22	6.11234e-21
AC113208.1	ENSG00000252722	scaRNA	1.28977	-2.03419	0.421874	-4.82179	1.42273e-06	5.32858e-06
AC096552.1	ENSG00000277035	misc_RNA	2.08059	-2.03436	0.301	-6.75867	1.39264e-11	1.1499e-10
AC090950.1	ENSG00000270409	transcribed_unprocessed_pseudogene	3.75716	-2.03565	0.21103	-9.64628	5.09692e-22	2.12238e-20
SNORD15B	ENSG00000207445	snoRNA	25.224	-2.03718	0.204145	-9.97907	1.88217e-23	9.68792e-22
AL731892.1	ENSG00000238145	processed_pseudogene	1.6546	-2.03721	0.249078	-8.17901	2.86185e-16	4.83189e-15
AC087260.1	ENSG00000256473	lncRNA	0.555881	-2.03868	0.587084	-3.47255	0.000515539	0.0012478
AL137071.1	ENSG00000236724	lncRNA	1.23695	-2.03896	0.444364	-4.58849	4.46469e-06	1.54565e-05
MIR28	ENSG00000207651	miRNA	0.646151	-2.03918	0.819411	-2.48859	0.0128251	0.0236382
AL357552.2	ENSG00000228423	lncRNA	2.55028	-2.03941	0.306715	-6.64921	2.94675e-11	2.31944e-10
Y_RNA	ENSG00000207117	misc_RNA	2.23725	-2.03978	0.286993	-7.10741	1.18245e-12	1.14466e-11
AL022238.1	ENSG00000227413	processed_pseudogene	4.45178	-2.03996	0.201878	-10.1049	5.25301e-24	2.92015e-22
COX6B1P3	ENSG00000172912	processed_pseudogene	1.0814	-2.04016	0.391647	-5.20917	1.89686e-07	8.2768e-07
CLMAT3	ENSG00000249035	lncRNA	7.06729	-2.04025	0.174817	-11.6707	1.79884e-31	2.88802e-29
RNU7-50P	ENSG00000238304	snRNA	0.790271	-2.04109	0.606196	-3.36704	0.000759803	0.00178311
AC005096.1	ENSG00000259294	lncRNA	6.01253	-2.04248	0.206615	-9.88544	4.81468e-23	2.35554e-21
AC099804.1	ENSG00000279570	TEC	5.93086	-2.04255	0.200894	-10.1673	2.77541e-24	1.61538e-22
HNRNPRP1	ENSG00000223984	processed_pseudogene	3.88729	-2.04279	0.229725	-8.89234	5.98365e-19	1.54802e-17
RN7SL679P	ENSG00000243905	misc_RNA	0.541779	-2.04331	0.556038	-3.67477	0.000238065	0.000613611
AC087441.3	ENSG00000255232	processed_pseudogene	0.661528	-2.04412	0.652917	-3.13074	0.00174365	0.00383216
OR10AB1P	ENSG00000176716	transcribed_unprocessed_pseudogene	0.984802	-2.04418	0.298671	-6.84427	7.68667e-12	6.57514e-11
CYP4A26P	ENSG00000259832	unprocessed_pseudogene	0.718015	-2.0445	0.344594	-5.93307	2.97325e-09	1.71812e-08
AC007342.1	ENSG00000259926	lncRNA	2.92624	-2.04453	0.261289	-7.82478	5.08553e-15	7.0632e-14
MTCO2P33	ENSG00000217083	processed_pseudogene	1.29388	-2.04507	0.435728	-4.69346	2.68625e-06	9.65122e-06
AL132765.1	ENSG00000230495	processed_pseudogene	5.58909	-2.04541	0.198049	-10.3278	5.27339e-25	3.40123e-23
RPS3AP28	ENSG00000234995	processed_pseudogene	1.8641	-2.04611	0.311703	-6.56427	5.22868e-11	3.95661e-10
LINC02024	ENSG00000241213	lncRNA	0.692716	-2.04637	0.53549	-3.8215	0.000132644	0.000357555
NANOGP5	ENSG00000231697	transcribed_processed_pseudogene	1.80101	-2.04697	0.373185	-5.48514	4.13147e-08	1.99712e-07
AC104332.1	ENSG00000225505	processed_pseudogene	2.88001	-2.04701	0.442437	-4.62667	3.71587e-06	1.30469e-05
SCARNA14	ENSG00000252712	scaRNA	0.745736	-2.04781	0.512081	-3.999	6.36116e-05	0.000181447
SPATA13-AS1	ENSG00000227213	lncRNA	2.6349	-2.04898	0.291112	-7.03847	1.94369e-12	1.82247e-11
AC073862.4	ENSG00000279976	TEC	4.21201	-2.0491	0.226397	-9.05092	1.41774e-19	4.02358e-18
MIR1299	ENSG00000275377	miRNA	0.563987	-2.04941	0.662782	-3.09213	0.00198725	0.00431908
AP004289.1	ENSG00000225017	processed_pseudogene	3.59605	-2.0501	0.314613	-6.51625	7.20887e-11	5.34411e-10
AC018557.2	ENSG00000260558	lncRNA	4.98687	-2.05019	0.206778	-9.91493	3.58513e-23	1.78542e-21
AC100781.1	ENSG00000268566	lncRNA	0.789077	-2.05058	0.477074	-4.29824	1.72161e-05	5.41957e-05
OR10A2	ENSG00000170790	protein_coding	0.883692	-2.05058	0.385972	-5.31276	1.07976e-07	4.89689e-07
RN7SKP118	ENSG00000201201	misc_RNA	0.943309	-2.05066	0.404366	-5.0713	3.95099e-07	1.62829e-06
RN7SL828P	ENSG00000272075	misc_RNA	0.571354	-2.051	0.649547	-3.15759	0.00159081	0.00352306
TMEM238L	ENSG00000263429	protein_coding	16.0273	-2.05117	0.276609	-7.41542	1.21239e-13	1.36638e-12
SNORA38B	ENSG00000200394	snoRNA	5.97359	-2.05195	0.220879	-9.28993	1.54385e-20	5.10089e-19
AC011755.1	ENSG00000279512	TEC	3.35941	-2.0521	0.337325	-6.08346	1.17613e-09	7.24241e-09
RLIMP1	ENSG00000229456	processed_pseudogene	5.4482	-2.05239	0.270669	-7.58264	3.38585e-14	4.1458e-13
AC013290.1	ENSG00000267585	processed_pseudogene	0.755748	-2.05381	0.603925	-3.40077	0.000671954	0.00159351
TRAJ23	ENSG00000211866	TR_J_gene	0.836676	-2.05403	0.45742	-4.49048	7.10643e-06	2.38591e-05
Y_RNA	ENSG00000200120	misc_RNA	2.00414	-2.05458	0.29129	-7.05337	1.74632e-12	1.64959e-11
PPFIA1P1	ENSG00000271639	processed_pseudogene	2.92377	-2.05505	0.277655	-7.40146	1.34697e-13	1.51002e-12
RN7SKP64	ENSG00000253015	misc_RNA	1.20754	-2.0555	0.432726	-4.75012	2.03292e-06	7.43058e-06
RN7SL2	ENSG00000274012	misc_RNA	6823.4	-2.05598	0.150234	-13.6852	1.24502e-42	8.26397e-40
MIR6081	ENSG00000274115	miRNA	1.01699	-2.05611	0.353131	-5.82251	5.79718e-09	3.20262e-08
AC087501.1	ENSG00000225751	lncRNA	6.54898	-2.05615	0.192365	-10.6888	1.14832e-26	9.37028e-25
LINC02312	ENSG00000258869	lncRNA	1.79346	-2.05628	0.417886	-4.92067	8.62484e-07	3.36165e-06
LINC01364	ENSG00000227290	lncRNA	1.6198	-2.05638	0.327755	-6.27413	3.51585e-10	2.34559e-09
MTCYBP40	ENSG00000248931	processed_pseudogene	0.529883	-2.05648	0.857972	-2.39691	0.0165342	0.0297539
LARS2-AS1	ENSG00000232455	lncRNA	1.86588	-2.05732	0.275358	-7.47144	7.93204e-14	9.17674e-13
CYP4A22	ENSG00000162365	protein_coding	6.41754	-2.05753	0.196472	-10.4724	1.15701e-25	8.10305e-24
MIR640	ENSG00000207821	miRNA	0.750186	-2.05887	0.597468	-3.446	0.000568958	0.00136771
COX6CP16	ENSG00000270313	processed_pseudogene	0.591072	-2.05897	0.565682	-3.6398	0.000272855	0.000695221
RN7SL457P	ENSG00000263794	misc_RNA	0.554391	-2.05965	0.666576	-3.0899	0.00200223	0.00434994
AC012409.5	ENSG00000280048	TEC	2.61632	-2.06018	0.207493	-9.92892	3.11621e-23	1.56592e-21
RN7SL543P	ENSG00000265918	misc_RNA	0.514826	-2.06052	0.567034	-3.63386	0.00027921	0.000710316
RN7SKP115	ENSG00000200047	misc_RNA	0.486403	-2.06066	0.985047	-2.09194	0.0364443	0.0605006
AC093770.1	ENSG00000248200	processed_pseudogene	1.09118	-2.06134	0.398147	-5.17732	2.25098e-07	9.6842e-07
AC015726.3	ENSG00000279251	TEC	1.11991	-2.06137	0.35169	-5.86133	4.59174e-09	2.57768e-08
AC021739.3	ENSG00000259544	lncRNA	5.47575	-2.06189	0.205777	-10.02	1.24468e-23	6.56624e-22
PHF5GP	ENSG00000238259	processed_pseudogene	2.26272	-2.06212	0.283125	-7.28341	3.25477e-13	3.43475e-12
Y_RNA	ENSG00000200922	misc_RNA	0.550812	-2.06273	0.671764	-3.07062	0.00213614	0.0046138
CCT4P2	ENSG00000225569	processed_pseudogene	1.67308	-2.06369	0.330537	-6.24345	4.28032e-10	2.81339e-09
SNORD58	ENSG00000212615	snoRNA	0.823631	-2.06595	0.422671	-4.88784	1.01948e-06	3.91964e-06
SNORD17	ENSG00000212232	snoRNA	79.7944	-2.0661	0.199481	-10.3574	3.87348e-25	2.56342e-23
AC012613.2	ENSG00000253406	lncRNA	2.98246	-2.06639	0.321288	-6.43158	1.26284e-10	9.02908e-10
RPL23AP70	ENSG00000241052	processed_pseudogene	1.53937	-2.06641	0.345802	-5.97571	2.29083e-09	1.34546e-08
RNU4-31P	ENSG00000206938	snRNA	0.992092	-2.06665	0.576831	-3.58277	0.000339971	0.000851978
NDUFB4P6	ENSG00000235258	processed_pseudogene	3.2241	-2.06814	0.23565	-8.77632	1.68908e-18	4.0758e-17
AC004386.7	ENSG00000278421	misc_RNA	3.05498	-2.06926	0.257578	-8.03352	9.47117e-16	1.46709e-14
RNU7-4P	ENSG00000252770	snRNA	1.30209	-2.06945	0.420605	-4.92019	8.64611e-07	3.36876e-06
RN7SL218P	ENSG00000244194	misc_RNA	0.61406	-2.07009	0.68427	-3.02525	0.00248425	0.00529414
RN7SKP185	ENSG00000199683	misc_RNA	2.88589	-2.07014	0.37201	-5.56474	2.62551e-08	1.31016e-07
CYP4A11	ENSG00000187048	protein_coding	7.80545	-2.07077	0.196781	-10.5232	6.75556e-26	4.97406e-24
Y_RNA	ENSG00000207034	misc_RNA	4.55315	-2.07079	0.201992	-10.2518	1.16128e-24	7.16289e-23
PPP1R9A-AS1	ENSG00000236197	lncRNA	2.98241	-2.0711	0.300539	-6.89128	5.52923e-12	4.83096e-11
AC013410.1	ENSG00000237016	processed_pseudogene	0.794219	-2.07111	0.417081	-4.96574	6.84406e-07	2.7108e-06
Z98885.1	ENSG00000236867	processed_pseudogene	5.77271	-2.07115	0.201838	-10.2614	1.05136e-24	6.53016e-23
AL136310.1	ENSG00000220506	processed_pseudogene	4.24055	-2.07128	0.214784	-9.64356	5.23418e-22	2.17141e-20
AC099550.1	ENSG00000251379	lncRNA	1.9229	-2.07175	0.252253	-8.21299	2.15753e-16	3.70892e-15
MTND2P5	ENSG00000224354	processed_pseudogene	0.978665	-2.07287	0.360884	-5.74387	9.25365e-09	4.94987e-08
AL357793.1	ENSG00000226640	lncRNA	0.693757	-2.07347	0.64492	-3.21508	0.00130406	0.0029327
HNRNPA3P15	ENSG00000225636	processed_pseudogene	2.53343	-2.07353	0.245525	-8.44527	3.03352e-17	5.94041e-16
Y_RNA	ENSG00000199357	misc_RNA	0.782415	-2.07405	0.412634	-5.02637	4.99838e-07	2.02688e-06
AL138745.1	ENSG00000252170	snoRNA	0.537243	-2.0747	0.690175	-3.00605	0.00264666	0.00561529
Y_RNA	ENSG00000201365	misc_RNA	0.946487	-2.075	0.510935	-4.06118	4.88254e-05	0.000142068
RNU6-1043P	ENSG00000222287	snRNA	1.80718	-2.07506	0.274087	-7.57081	3.70912e-14	4.51182e-13
AL590233.1	ENSG00000225460	processed_pseudogene	4.2446	-2.07547	0.212794	-9.75342	1.78352e-22	7.97154e-21
MTND5P14	ENSG00000230225	unprocessed_pseudogene	2.13269	-2.07652	0.298827	-6.94891	3.68129e-12	3.30602e-11
AL139156.3	ENSG00000236004	processed_pseudogene	0.640444	-2.07677	0.479104	-4.3347	1.45959e-05	4.65243e-05
PLET1	ENSG00000188771	protein_coding	2.64283	-2.07754	0.24877	-8.35124	6.75509e-17	1.24912e-15
RN7SL38P	ENSG00000240481	misc_RNA	0.830339	-2.07886	0.849375	-2.44752	0.0143844	0.0262195
AP001007.1	ENSG00000254932	lncRNA	0.711161	-2.07975	0.609417	-3.4127	0.000643234	0.0015321
RNU6-999P	ENSG00000251754	snRNA	0.681449	-2.08022	0.518065	-4.01536	5.93557e-05	0.000170224
MIR4694	ENSG00000264309	miRNA	0.479506	-2.08025	0.816021	-2.54926	0.0107952	0.0202167
AC104819.2	ENSG00000250350	unprocessed_pseudogene	0.817447	-2.08055	0.543881	-3.82538	0.000130571	0.00035235
TMEM256P1	ENSG00000233197	processed_pseudogene	0.658836	-2.0806	0.41386	-5.02731	4.97407e-07	2.01739e-06
RNU4-38P	ENSG00000201342	snRNA	1.41997	-2.08111	0.300345	-6.92906	4.2365e-12	3.77113e-11
AC011726.1	ENSG00000253430	lncRNA	0.885533	-2.08122	0.301542	-6.90193	5.13007e-12	4.51325e-11
SNORD111B	ENSG00000221514	snoRNA	0.740775	-2.08161	0.479306	-4.34297	1.40568e-05	4.49479e-05
RNU5E-4P	ENSG00000201801	snRNA	1.63695	-2.08166	0.421774	-4.93549	7.99495e-07	3.13234e-06
AC105129.3	ENSG00000270690	processed_pseudogene	2.87265	-2.08334	0.237457	-8.77352	1.73167e-18	4.16726e-17
AC024032.2	ENSG00000276396	misc_RNA	1.44986	-2.08372	0.353372	-5.89666	3.70936e-09	2.11409e-08
RN7SL70P	ENSG00000241172	misc_RNA	0.679427	-2.08383	0.519549	-4.01085	6.05015e-05	0.00017324
AC069437.1	ENSG00000257458	lncRNA	0.729203	-2.08407	0.410683	-5.07465	3.88213e-07	1.60154e-06
MTND4P20	ENSG00000233377	processed_pseudogene	13.1692	-2.08417	0.242145	-8.60708	7.49422e-18	1.62635e-16
AC004223.1	ENSG00000243423	processed_pseudogene	2.6247	-2.08445	0.233741	-8.91776	4.75821e-19	1.2499e-17
AL390774.1	ENSG00000229115	processed_pseudogene	0.736651	-2.08463	0.55271	-3.77165	0.00016217	0.000430722
TVP23CP1	ENSG00000223584	processed_pseudogene	1.95321	-2.08466	0.372076	-5.60279	2.10925e-08	1.06752e-07
AC078950.1	ENSG00000255790	lncRNA	2.03129	-2.08481	0.306764	-6.79614	1.07458e-11	9.01502e-11
SNORD116-23	ENSG00000207375	snoRNA	0.589312	-2.0851	0.612506	-3.40422	0.000663537	0.0015758
AC096708.1	ENSG00000264236	processed_pseudogene	0.849376	-2.08546	0.357987	-5.8255	5.69415e-09	3.15237e-08
DDX18P5	ENSG00000255220	processed_pseudogene	2.93801	-2.08576	0.293741	-7.10066	1.24161e-12	1.19724e-11
MTCO1P15	ENSG00000255350	processed_pseudogene	2.69479	-2.08629	0.267506	-7.79903	6.2386e-15	8.52883e-14
CCNB1IP1P3	ENSG00000231001	processed_pseudogene	0.73274	-2.08872	0.561332	-3.721	0.000198434	0.000518961
AC034234.1	ENSG00000248935	lncRNA	0.944734	-2.08889	0.426686	-4.89562	9.79943e-07	3.77971e-06
AC007312.1	ENSG00000224946	processed_pseudogene	0.615451	-2.08916	0.633973	-3.29535	0.00098299	0.00225733
AC106053.1	ENSG00000224626	lncRNA	1.49618	-2.08927	0.289432	-7.21851	5.25587e-13	5.37524e-12
AC004009.2	ENSG00000279429	TEC	0.513473	-2.08959	0.727184	-2.87354	0.00405898	0.0083005
AC008056.1	ENSG00000258637	lncRNA	0.878713	-2.08962	0.459837	-4.54427	5.51255e-06	1.88175e-05
TAS2R41	ENSG00000221855	protein_coding	0.60652	-2.08986	0.551224	-3.79132	0.00014985	0.000400297
AL590762.4	ENSG00000229601	processed_pseudogene	3.54664	-2.08993	0.216983	-9.63179	5.86987e-22	2.40152e-20
RN7SL149P	ENSG00000241834	misc_RNA	0.631742	-2.09044	0.593603	-3.52161	0.000428937	0.00105408
RN7SKP52	ENSG00000252028	misc_RNA	0.896643	-2.09055	0.666063	-3.13867	0.00169718	0.00373833
RN7SL37P	ENSG00000242493	misc_RNA	1.97661	-2.09085	0.31049	-6.73402	1.65042e-11	1.34788e-10
RNA5SP344	ENSG00000223013	rRNA_pseudogene	0.586401	-2.0909	0.962479	-2.17241	0.0298249	0.05057
AC092127.1	ENSG00000260417	lncRNA	4.34411	-2.0909	0.227449	-9.19285	3.82563e-20	1.1856e-18
RN7SL788P	ENSG00000241745	misc_RNA	0.643247	-2.09128	0.533828	-3.91751	8.94693e-05	0.000248587
RN7SL778P	ENSG00000272412	misc_RNA	0.821542	-2.09226	0.494904	-4.2276	2.36192e-05	7.27067e-05
AC007529.1	ENSG00000255871	lncRNA	1.31262	-2.09277	0.325923	-6.42106	1.35326e-10	9.63686e-10
AL139081.1	ENSG00000232986	lncRNA	0.990395	-2.09301	0.332925	-6.28673	3.24232e-10	2.17715e-09
AC011379.1	ENSG00000250069	lncRNA	6.84772	-2.09319	0.187752	-11.1487	7.2638e-29	7.82168e-27
AC011921.3	ENSG00000270553	processed_pseudogene	3.243	-2.0936	0.243584	-8.59495	8.32975e-18	1.79217e-16
AL353662.1	ENSG00000227383	processed_pseudogene	4.10534	-2.09385	0.268873	-7.78751	6.83404e-15	9.30853e-14
AC113349.1	ENSG00000249621	lncRNA	9.54983	-2.09433	0.265649	-7.8838	3.17582e-15	4.53841e-14
AC010261.2	ENSG00000251187	lncRNA	3.92184	-2.09445	0.198943	-10.5279	6.42558e-26	4.76264e-24
AP001007.3	ENSG00000259290	lncRNA	0.666292	-2.09566	0.520134	-4.02908	5.59955e-05	0.000161337
AC090519.2	ENSG00000259499	lncRNA	3.74604	-2.09575	0.224763	-9.32426	1.11759e-20	3.76811e-19
HEBP2P1	ENSG00000235548	processed_pseudogene	1.74598	-2.09582	0.306641	-6.83478	8.21325e-12	6.99062e-11
AP005059.1	ENSG00000264000	lncRNA	0.821923	-2.09708	0.414902	-5.05439	4.3176e-07	1.76742e-06
LINC01845	ENSG00000253298	lncRNA	2.04935	-2.09822	0.28041	-7.48268	7.28247e-14	8.4693e-13
RN7SL735P	ENSG00000244044	misc_RNA	2.25845	-2.09872	0.4949	-4.24069	2.22834e-05	6.88856e-05
ADGRG4	ENSG00000156920	protein_coding	1.52184	-2.099	0.259999	-8.07311	6.85292e-16	1.09195e-14
EIF4A1P11	ENSG00000231564	processed_pseudogene	1.89647	-2.09953	0.278168	-7.54773	4.42925e-14	5.33092e-13
AC003101.1	ENSG00000228768	lncRNA	0.810445	-2.09988	0.408658	-5.13847	2.76985e-07	1.17148e-06
MIR5692C2	ENSG00000266668	miRNA	1.95736	-2.10077	0.271419	-7.73998	9.94332e-15	1.32158e-13
ADGRF5-AS1	ENSG00000225730	lncRNA	3.79977	-2.10113	0.289521	-7.25727	3.94981e-13	4.12241e-12
AC107390.1	ENSG00000200999	snoRNA	0.717996	-2.10172	0.568152	-3.69922	0.000216265	0.000561719
AC097467.3	ENSG00000250910	lncRNA	4.96412	-2.10194	0.204212	-10.293	7.58137e-25	4.80968e-23
AL031667.2	ENSG00000235088	processed_pseudogene	2.36597	-2.10214	0.246881	-8.51478	1.66902e-17	3.42998e-16
MTND4P15	ENSG00000227321	unprocessed_pseudogene	3.58657	-2.10219	0.223935	-9.38748	6.14539e-21	2.14351e-19
UBE2CP1	ENSG00000258648	processed_pseudogene	3.45958	-2.10293	0.25527	-8.23804	1.75049e-16	3.05525e-15
RN7SL530P	ENSG00000239910	misc_RNA	0.879857	-2.10315	0.404142	-5.20399	1.9505e-07	8.48754e-07
AL365215.1	ENSG00000275001	misc_RNA	0.51974	-2.10389	0.839773	-2.50531	0.0122344	0.022655
AC073916.1	ENSG00000255965	processed_pseudogene	1.54817	-2.10447	0.311138	-6.76379	1.34428e-11	1.11327e-10
Metazoa_SRP	ENSG00000278818	misc_RNA	3.09516	-2.10467	0.266134	-7.9083	2.60928e-15	3.78721e-14
RN7SL230P	ENSG00000264916	misc_RNA	2.94566	-2.10481	0.287362	-7.3246	2.39613e-13	2.58184e-12
AL133485.2	ENSG00000258843	lncRNA	0.965836	-2.10484	0.481065	-4.37539	1.21217e-05	3.92055e-05
Y_RNA	ENSG00000202100	misc_RNA	0.850788	-2.10486	0.440642	-4.77679	1.78115e-06	6.56757e-06
AL392003.2	ENSG00000230739	unprocessed_pseudogene	1.49682	-2.10493	0.335285	-6.27804	3.42877e-10	2.29127e-09
RNU6-57P	ENSG00000223280	snRNA	1.0888	-2.10622	0.37979	-5.54575	2.92699e-08	1.45003e-07
POLHP1	ENSG00000232970	processed_pseudogene	2.6232	-2.10641	0.274306	-7.67905	1.6027e-14	2.06595e-13
AC080075.1	ENSG00000256458	lncRNA	0.781538	-2.1066	0.400604	-5.25856	1.45188e-07	6.45692e-07
AC130448.1	ENSG00000279202	TEC	1.71363	-2.10663	0.351068	-6.00063	1.9655e-09	1.16577e-08
AC087893.2	ENSG00000274598	lncRNA	4.0849	-2.10673	0.246171	-8.55796	1.14882e-17	2.41791e-16
RN7SL302P	ENSG00000241246	misc_RNA	0.781419	-2.10766	0.589341	-3.5763	0.000348494	0.00087093
AC104984.5	ENSG00000266987	lncRNA	3.12912	-2.10767	0.26535	-7.94298	1.97382e-15	2.91531e-14
SNORA22	ENSG00000206634	snoRNA	9.89245	-2.10795	0.187047	-11.2696	1.85394e-29	2.2045e-27
AL732366.2	ENSG00000201882	snoRNA	1.62962	-2.10807	0.320623	-6.57491	4.86835e-11	3.70094e-10
RN7SKP96	ENSG00000252757	misc_RNA	0.704536	-2.10811	0.524116	-4.02223	5.76503e-05	0.000165675
RNU6-1152P	ENSG00000207306	snRNA	0.996749	-2.10841	0.36584	-5.76319	8.25396e-09	4.44934e-08
RNU6-319P	ENSG00000251834	snRNA	0.584204	-2.10865	0.706811	-2.98333	0.00285129	0.00601075
RN7SL3	ENSG00000278771	misc_RNA	154.533	-2.11024	0.201033	-10.497	8.91811e-26	6.37631e-24
CYCSP38	ENSG00000259513	transcribed_processed_pseudogene	2.56417	-2.11026	0.297449	-7.09453	1.29788e-12	1.24718e-11
RNA5S9	ENSG00000201321	rRNA	0.464964	-2.1106	1.11259	-1.89701	0.0578268	0.0912102
RNA5-8SP6	ENSG00000251705	rRNA_pseudogene	0.943602	-2.11096	0.386739	-5.45835	4.80575e-08	2.30256e-07
RN7SL709P	ENSG00000241032	misc_RNA	1.06401	-2.11171	0.373589	-5.65251	1.58124e-08	8.15504e-08
AC006924.1	ENSG00000275314	unprocessed_pseudogene	0.44729	-2.11243	0.782768	-2.69866	0.00696184	0.0135662
PRELID1P3	ENSG00000235816	processed_pseudogene	3.07118	-2.11287	0.25508	-8.28318	1.19933e-16	2.13176e-15
VDAC1P4	ENSG00000235060	processed_pseudogene	2.1973	-2.11349	0.27846	-7.58993	3.20081e-14	3.94203e-13
AL137789.1	ENSG00000236911	lncRNA	2.299	-2.11357	0.299552	-7.05578	1.71641e-12	1.62271e-11
LINC02039	ENSG00000248107	lncRNA	0.524518	-2.11391	0.925065	-2.28515	0.0223042	0.0389536
MIR548B	ENSG00000207982	miRNA	0.552529	-2.1148	0.706197	-2.99463	0.00274779	0.00580935
AC073862.3	ENSG00000279940	TEC	12.8188	-2.11543	0.220467	-9.59522	8.37406e-22	3.33702e-20
AC134349.1	ENSG00000256712	lncRNA	2.69317	-2.11575	0.266334	-7.94398	1.95794e-15	2.89473e-14
RN7SL732P	ENSG00000264618	misc_RNA	1.97342	-2.11851	0.364748	-5.80815	6.31653e-09	3.46862e-08
FAM53B-AS1	ENSG00000233334	lncRNA	4.77557	-2.1192	0.217879	-9.72651	2.32437e-22	1.01942e-20
MIR3611	ENSG00000266228	miRNA	0.710332	-2.11921	0.613908	-3.452	0.000556456	0.00133976
MTCO3P2	ENSG00000232102	processed_pseudogene	0.541055	-2.11981	0.648773	-3.26742	0.00108533	0.00247624
Y_RNA	ENSG00000206651	misc_RNA	2.89747	-2.12005	0.236179	-8.97646	2.79613e-19	7.57766e-18
AC007619.2	ENSG00000271370	processed_pseudogene	1.59557	-2.12011	0.292333	-7.25237	4.09549e-13	4.26644e-12
AC026401.1	ENSG00000257769	lncRNA	3.05466	-2.12117	0.24399	-8.69365	3.50965e-18	8.03714e-17
TMEM14EP	ENSG00000221962	transcribed_processed_pseudogene	4.27687	-2.1222	0.27855	-7.61874	2.56154e-14	3.20351e-13
RN7SL678P	ENSG00000263969	misc_RNA	0.808943	-2.12296	0.406252	-5.22571	1.73489e-07	7.61562e-07
TRPC5	ENSG00000072315	protein_coding	3.00215	-2.12396	0.275339	-7.71398	1.21958e-14	1.5985e-13
AC004805.2	ENSG00000270870	processed_pseudogene	0.915222	-2.12424	0.352339	-6.02898	1.65e-09	9.92279e-09
CYCSP29	ENSG00000255379	processed_pseudogene	0.828281	-2.12442	0.53743	-3.95293	7.71999e-05	0.000216662
AL356423.1	ENSG00000271437	processed_pseudogene	2.64077	-2.12499	0.265124	-8.01507	1.10074e-15	1.68917e-14
RNU1-93P	ENSG00000201574	snRNA	0.636055	-2.12667	0.559267	-3.80261	0.00014318	0.000383955
EIF4A1P8	ENSG00000213484	processed_pseudogene	1.76388	-2.12678	0.287697	-7.39243	1.44168e-13	1.60889e-12
CTHRC1P1	ENSG00000271005	processed_pseudogene	0.754384	-2.12778	0.698821	-3.04481	0.00232828	0.00499245
Y_RNA	ENSG00000199567	misc_RNA	0.869365	-2.12813	0.440634	-4.82969	1.36743e-06	5.14182e-06
AL161912.2	ENSG00000260564	lncRNA	0.745515	-2.12885	0.430453	-4.94559	7.59125e-07	2.98469e-06
RN7SL677P	ENSG00000242863	misc_RNA	0.432541	-2.12925	1.00757	-2.11324	0.0345798	0.0577265
RNU6-1177P	ENSG00000212360	snRNA	0.77089	-2.12958	0.438782	-4.85338	1.21372e-06	4.60905e-06
AL033519.2	ENSG00000218749	processed_pseudogene	2.08628	-2.13026	0.31245	-6.81793	9.236e-12	7.8103e-11
AC073626.1	ENSG00000224595	lncRNA	0.691519	-2.13036	0.715914	-2.97572	0.00292302	0.00614738
RPL30P13	ENSG00000229014	processed_pseudogene	0.936798	-2.13082	0.512919	-4.1543	3.2628e-05	9.79304e-05
AP002892.2	ENSG00000256739	lncRNA	0.809567	-2.1316	0.410903	-5.18761	2.13009e-07	9.20865e-07
ASH1L-IT1	ENSG00000227773	lncRNA	4.47994	-2.13402	0.246313	-8.66385	4.56076e-18	1.02957e-16
RPL6P2	ENSG00000227056	processed_pseudogene	2.74728	-2.13415	0.254897	-8.37261	5.63551e-17	1.05215e-15
AMZ2P2	ENSG00000219249	processed_pseudogene	2.68387	-2.13446	0.306869	-6.95561	3.5104e-12	3.16021e-11
RN7SL272P	ENSG00000242360	misc_RNA	0.487139	-2.13479	0.874918	-2.43999	0.0146876	0.026724
GAPDHP51	ENSG00000236973	processed_pseudogene	1.58322	-2.13565	0.343085	-6.22484	4.82042e-10	3.14285e-09
RBMS3-AS2	ENSG00000203506	lncRNA	7.16738	-2.13579	0.200887	-10.6318	2.12029e-26	1.65427e-24
RN7SL254P	ENSG00000240014	misc_RNA	0.629626	-2.13581	0.97309	-2.19487	0.0281729	0.0480592
AL034418.1	ENSG00000229853	processed_pseudogene	5.00347	-2.13582	0.236119	-9.04551	1.48963e-19	4.20883e-18
PAPOLB	ENSG00000218823	protein_coding	1.57842	-2.13586	0.304227	-7.02061	2.20902e-12	2.05393e-11
AC092839.1	ENSG00000228108	lncRNA	3.06371	-2.13591	0.275781	-7.74495	9.56219e-15	1.27397e-13
AL133260.2	ENSG00000232290	lncRNA	1.99013	-2.13609	0.298868	-7.14728	8.85147e-13	8.72628e-12
AL079341.1	ENSG00000217227	processed_pseudogene	2.01126	-2.13704	0.297059	-7.194	6.29211e-13	6.3625e-12
AC108097.1	ENSG00000260183	lncRNA	2.11776	-2.13754	0.23733	-9.0066	2.12538e-19	5.88176e-18
U3	ENSG00000212195	snoRNA	2.75037	-2.13768	0.294528	-7.25798	3.92913e-13	4.10372e-12
AC104129.1	ENSG00000176349	lncRNA	4.3548	-2.13789	0.222549	-9.60636	7.51584e-22	3.01665e-20
RNU6-838P	ENSG00000200269	snRNA	0.658163	-2.13857	0.55507	-3.8528	0.000116775	0.00031794
UBE2L2	ENSG00000131982	processed_pseudogene	0.980846	-2.13911	0.465798	-4.59235	4.38282e-06	1.51943e-05
AC027575.1	ENSG00000265261	processed_pseudogene	4.19661	-2.13914	0.250028	-8.55562	1.17242e-17	2.46175e-16
RN7SL559P	ENSG00000240750	misc_RNA	3.52079	-2.13932	0.26685	-8.01692	1.08432e-15	1.66627e-14
AC004130.1	ENSG00000200753	snoRNA	1.21795	-2.13937	0.348308	-6.14218	8.13977e-10	5.12882e-09
Y_RNA	ENSG00000201566	misc_RNA	0.71583	-2.14	0.463494	-4.61709	3.89156e-06	1.36154e-05
H2BC10	ENSG00000278588	protein_coding	4.02698	-2.14044	0.276089	-7.75273	8.99354e-15	1.20289e-13
AL360091.3	ENSG00000234915	lncRNA	2.8646	-2.14076	0.281397	-7.60762	2.79192e-14	3.47129e-13
AC069023.1	ENSG00000235637	lncRNA	2.12683	-2.14159	0.325971	-6.56987	5.03607e-11	3.82256e-10
Y_RNA	ENSG00000200351	misc_RNA	1.17052	-2.14162	0.427471	-5.00997	5.44392e-07	2.19434e-06
AC025031.3	ENSG00000274591	lncRNA	2.50807	-2.14215	0.285407	-7.50562	6.11391e-14	7.18735e-13
Y_RNA	ENSG00000195401	misc_RNA	0.802946	-2.14259	0.536316	-3.99502	6.46889e-05	0.000184201
AC006600.2	ENSG00000279606	TEC	1.5259	-2.1432	0.263193	-8.14307	3.85366e-16	6.35918e-15
AP002762.1	ENSG00000239079	snoRNA	0.64608	-2.14352	0.505226	-4.24269	2.20853e-05	6.83016e-05
RN7SL68P	ENSG00000242020	misc_RNA	1.86611	-2.14353	0.254191	-8.43275	3.37626e-17	6.55101e-16
RN7SL681P	ENSG00000240966	misc_RNA	1.0046	-2.14401	0.408062	-5.25414	1.4872e-07	6.60266e-07
TRAJ20	ENSG00000211869	TR_J_gene	1.00111	-2.14436	0.449214	-4.77359	1.80971e-06	6.66457e-06
AC011399.1	ENSG00000200051	snoRNA	0.686612	-2.14488	0.609382	-3.51976	0.000431937	0.00106075
OR5P4P	ENSG00000227892	unprocessed_pseudogene	0.515556	-2.14499	0.777867	-2.75753	0.00582402	0.0115452
TAS2R46	ENSG00000226761	protein_coding	3.26346	-2.14499	0.304897	-7.03515	1.99052e-12	1.86324e-11
AC068025.2	ENSG00000266111	lncRNA	3.76492	-2.14521	0.233732	-9.17808	4.38838e-20	1.34872e-18
AC079781.1	ENSG00000231859	processed_pseudogene	1.23505	-2.1456	0.287147	-7.47212	7.89138e-14	9.13445e-13
NUDT19P5	ENSG00000251073	processed_pseudogene	1.03453	-2.14596	0.341046	-6.2923	3.128e-10	2.10643e-09
AC022001.3	ENSG00000272483	lncRNA	3.40603	-2.14675	0.251063	-8.55064	1.22406e-17	2.55931e-16
AC079866.1	ENSG00000256399	processed_pseudogene	2.74012	-2.14696	0.283833	-7.56418	3.90317e-14	4.7362e-13
AC111194.2	ENSG00000250646	lncRNA	1.02706	-2.14767	0.390407	-5.50112	3.77384e-08	1.83642e-07
AL591416.1	ENSG00000218476	processed_pseudogene	0.920674	-2.14877	0.447726	-4.79929	1.59227e-06	5.91327e-06
AC069236.1	ENSG00000271711	processed_pseudogene	3.1946	-2.14893	0.238934	-8.99381	2.38796e-19	6.56754e-18
RN7SL518P	ENSG00000265486	misc_RNA	0.587631	-2.14921	0.710885	-3.02329	0.00250046	0.00532645
AL356320.2	ENSG00000237329	processed_pseudogene	3.27215	-2.14929	0.295575	-7.27156	3.55367e-13	3.73526e-12
AC010082.1	ENSG00000225000	lncRNA	0.598211	-2.14996	0.856039	-2.51152	0.0120211	0.0223012
RNU1-94P	ENSG00000199497	snRNA	0.793987	-2.15023	0.338105	-6.35966	2.02204e-10	1.40287e-09
SEPTIN7P1	ENSG00000259090	processed_pseudogene	3.45398	-2.15069	0.249407	-8.62322	6.50987e-18	1.42825e-16
ZNF90P1	ENSG00000241738	processed_pseudogene	3.7864	-2.15084	0.254511	-8.45085	2.89184e-17	5.66795e-16
RN7SL166P	ENSG00000275014	misc_RNA	2.47736	-2.15111	0.342818	-6.27481	3.50066e-10	2.33651e-09
SLC25A39P1	ENSG00000226148	processed_pseudogene	5.54031	-2.15278	0.243862	-8.82787	1.06685e-18	2.66097e-17
AC243773.2	ENSG00000277911	lncRNA	2.06893	-2.1533	0.271816	-7.9219	2.33905e-15	3.41842e-14
PAICSP7	ENSG00000232293	processed_pseudogene	0.560439	-2.15467	0.726649	-2.96522	0.00302467	0.00634675
TAS2R13	ENSG00000212128	protein_coding	4.00252	-2.15565	0.264099	-8.16227	3.28775e-16	5.48847e-15
AC022493.1	ENSG00000244630	processed_pseudogene	1.0324	-2.15721	0.35218	-6.1253	9.05122e-10	5.66539e-09
RNU1-34P	ENSG00000201291	snRNA	0.513591	-2.15752	0.945925	-2.28085	0.0225571	0.0393458
RPL19P14	ENSG00000240870	processed_pseudogene	1.07339	-2.158	0.370482	-5.82484	5.71683e-09	3.16218e-08
RPS15AP29	ENSG00000237827	processed_pseudogene	3.50496	-2.15813	0.271924	-7.93651	2.07955e-15	3.06434e-14
RNU6-759P	ENSG00000252549	snRNA	2.22576	-2.15861	0.256566	-8.41347	3.98061e-17	7.62385e-16
AL133499.1	ENSG00000267857	lncRNA	0.87438	-2.15876	0.414648	-5.20626	1.92682e-07	8.398e-07
AC025030.2	ENSG00000257947	lncRNA	0.847426	-2.15894	0.469883	-4.59463	4.33526e-06	1.50459e-05
AC104763.2	ENSG00000275562	unprocessed_pseudogene	2.68304	-2.1591	0.306624	-7.04153	1.90135e-12	1.78654e-11
LDHAL6EP	ENSG00000270098	processed_pseudogene	1.54444	-2.15953	0.290932	-7.42281	1.1466e-13	1.29585e-12
AC073651.1	ENSG00000255565	lncRNA	2.81647	-2.15983	0.304354	-7.09645	1.28004e-12	1.23083e-11
AC008883.2	ENSG00000251054	lncRNA	1.82297	-2.16038	0.326841	-6.60986	3.84672e-11	2.97153e-10
AC108159.1	ENSG00000251523	lncRNA	2.33348	-2.16059	0.281492	-7.6755	1.64772e-14	2.12152e-13
AL138808.1	ENSG00000237832	lncRNA	0.494821	-2.16066	0.789808	-2.73568	0.00622518	0.0122509
RNU6-960P	ENSG00000200926	snRNA	0.620551	-2.16155	0.798415	-2.7073	0.00678329	0.0132449
RN7SL756P	ENSG00000244610	misc_RNA	1.26583	-2.16162	0.451944	-4.78293	1.72757e-06	6.38162e-06
MIR4473	ENSG00000263790	miRNA	0.799178	-2.16182	0.650608	-3.32276	0.000891313	0.00206289
RPL35AP24	ENSG00000230166	processed_pseudogene	1.1366	-2.16205	0.379471	-5.69754	1.21549e-08	6.38648e-08
AP002884.1	ENSG00000254638	lncRNA	1.86659	-2.1624	0.29932	-7.22437	5.03435e-13	5.16823e-12
MIR1200	ENSG00000221325	miRNA	0.60643	-2.16272	0.769077	-2.81209	0.00492202	0.00990416
AL591212.2	ENSG00000235224	processed_pseudogene	0.848859	-2.16385	0.463568	-4.6678	3.04438e-06	1.08372e-05
TRAJ27	ENSG00000211862	TR_J_gene	0.797441	-2.16448	0.402267	-5.38071	7.41933e-08	3.45572e-07
H2AZP4	ENSG00000255329	processed_pseudogene	4.89682	-2.16487	0.210823	-10.2687	9.75243e-25	6.11721e-23
AC093783.1	ENSG00000275647	processed_pseudogene	0.995438	-2.16526	0.38857	-5.57239	2.51263e-08	1.25651e-07
Y_RNA	ENSG00000207438	misc_RNA	1.81351	-2.16528	0.266594	-8.12202	4.58484e-16	7.48247e-15
SNORA74	ENSG00000252917	snoRNA	0.818225	-2.16573	0.490824	-4.41244	1.02213e-05	3.34801e-05
OR13H1	ENSG00000171054	protein_coding	0.829088	-2.16659	0.510112	-4.24728	2.16382e-05	6.70215e-05
PRO1804	ENSG00000278873	TEC	1.19319	-2.16659	0.401267	-5.39938	6.68698e-08	3.14093e-07
AC099689.1	ENSG00000279416	TEC	3.31096	-2.16667	0.274999	-7.87883	3.30473e-15	4.71202e-14
AL118556.1	ENSG00000201573	misc_RNA	2.32435	-2.16699	0.285678	-7.58543	3.31375e-14	4.06984e-13
AP005120.1	ENSG00000263952	lncRNA	0.861227	-2.16729	0.593635	-3.65088	0.000261344	0.000668382
SCGB3A1	ENSG00000161055	protein_coding	15476.6	-2.16742	0.224665	-9.64737	5.04348e-22	2.1021e-20
OSTCP8	ENSG00000226801	processed_pseudogene	3.39219	-2.16786	0.257551	-8.4172	3.85591e-17	7.40415e-16
AC104126.1	ENSG00000251076	lncRNA	3.81586	-2.16843	0.318657	-6.8049	1.01117e-11	8.51034e-11
ANKRD49P2	ENSG00000225349	processed_pseudogene	1.15307	-2.16879	0.392575	-5.52452	3.30393e-08	1.62231e-07
AC013553.2	ENSG00000270218	processed_pseudogene	1.52875	-2.16898	0.299296	-7.24693	4.26331e-13	4.42469e-12
AC044784.1	ENSG00000223808	lncRNA	0.534977	-2.16907	0.875852	-2.47653	0.0132667	0.024365
AC022929.1	ENSG00000259731	lncRNA	0.683196	-2.1692	0.903525	-2.40082	0.0163584	0.0294746
AL450263.2	ENSG00000229369	processed_pseudogene	0.852399	-2.16927	0.422358	-5.13609	2.80517e-07	1.18517e-06
RNU7-180P	ENSG00000238374	snRNA	0.656102	-2.16932	0.818994	-2.64877	0.00807857	0.0155448
MIR454	ENSG00000211514	miRNA	1.0282	-2.1703	0.445645	-4.87003	1.11581e-06	4.26197e-06
AL049758.1	ENSG00000226989	processed_pseudogene	1.78512	-2.17157	0.297663	-7.29541	2.97761e-13	3.15511e-12
RNU6-514P	ENSG00000206935	snRNA	0.626114	-2.17181	0.579589	-3.74715	0.000178852	0.000471819
AL122008.1	ENSG00000231272	lncRNA	0.847256	-2.17276	0.468767	-4.63504	3.56861e-06	1.25684e-05
RN7SL277P	ENSG00000240490	misc_RNA	3.04852	-2.17342	0.271143	-8.01578	1.0944e-15	1.6806e-14
FBXW7-AS1	ENSG00000270751	lncRNA	2.38554	-2.17398	0.284511	-7.64112	2.15338e-14	2.72369e-13
AC005070.1	ENSG00000270764	processed_pseudogene	0.941836	-2.17431	0.49883	-4.35882	1.30767e-05	4.20435e-05
COX6CP10	ENSG00000238008	processed_pseudogene	1.34031	-2.17465	0.373386	-5.82414	5.74067e-09	3.17378e-08
RN7SL414P	ENSG00000239396	misc_RNA	1.19938	-2.17648	0.723688	-3.00748	0.00263422	0.00559157
PSMA2P1	ENSG00000254582	processed_pseudogene	1.2499	-2.17682	0.338489	-6.43098	1.26781e-10	9.06171e-10
RNU6-942P	ENSG00000199872	snRNA	3.43958	-2.17803	0.270561	-8.05005	8.27621e-16	1.29827e-14
AC122718.2	ENSG00000251682	processed_pseudogene	4.65693	-2.17876	0.225935	-9.64331	5.24684e-22	2.17463e-20
RPS3AP32	ENSG00000240047	processed_pseudogene	0.795428	-2.17962	0.588734	-3.70222	0.000213723	0.0005557
AC139720.2	ENSG00000251248	lncRNA	0.590668	-2.18076	0.780556	-2.79385	0.00520843	0.0104305
RN7SL646P	ENSG00000242341	misc_RNA	0.621916	-2.1809	0.587053	-3.715	0.000203207	0.000530187
AC009102.1	ENSG00000260198	lncRNA	0.878435	-2.18134	0.365426	-5.96932	2.38245e-09	1.39558e-08
RN7SKP78	ENSG00000201581	misc_RNA	2.66211	-2.18233	0.258939	-8.42796	3.51753e-17	6.81323e-16
AL356320.1	ENSG00000232768	processed_pseudogene	2.82132	-2.18277	0.300192	-7.27124	3.56206e-13	3.7432e-12
RNU6-1170P	ENSG00000251783	snRNA	1.08992	-2.18359	0.359572	-6.07276	1.25733e-09	7.70828e-09
AC040975.1	ENSG00000242958	processed_pseudogene	1.38276	-2.18476	0.324479	-6.73315	1.66026e-11	1.35527e-10
AC108157.1	ENSG00000249976	processed_pseudogene	0.910448	-2.18496	0.426581	-5.12203	3.02266e-07	1.27018e-06
AGBL1-AS1	ENSG00000260125	lncRNA	1.44035	-2.18838	0.368388	-5.94042	2.84295e-09	1.64603e-08
SAMD11P1	ENSG00000262480	processed_pseudogene	1.27845	-2.18963	0.332427	-6.5868	4.49406e-11	3.43697e-10
AC087276.3	ENSG00000255340	lncRNA	2.43613	-2.18982	0.287997	-7.60364	2.87925e-14	3.57171e-13
MTND5P31	ENSG00000227841	unprocessed_pseudogene	0.899685	-2.18996	0.336707	-6.50406	7.81817e-11	5.77174e-10
AC116158.2	ENSG00000259598	lncRNA	2.0936	-2.1904	0.284567	-7.69729	1.38979e-14	1.80721e-13
RN7SKP47	ENSG00000202217	misc_RNA	0.527453	-2.19041	0.972695	-2.25189	0.024329	0.042116
AC093849.1	ENSG00000261646	lncRNA	2.85747	-2.19067	0.276888	-7.91175	2.53801e-15	3.69461e-14
AC092800.1	ENSG00000236390	lncRNA	1.96946	-2.19082	0.334126	-6.55686	5.49533e-11	4.1485e-10
AC092535.1	ENSG00000212458	snoRNA	1.7464	-2.19122	0.365705	-5.99177	2.07564e-09	1.22652e-08
AC079316.2	ENSG00000279176	TEC	2.88565	-2.19155	0.314717	-6.96353	3.31841e-12	2.99769e-11
AC008638.1	ENSG00000248831	processed_pseudogene	0.55853	-2.1916	1.13474	-1.93137	0.053437	0.0850799
TRAJ24	ENSG00000211865	TR_J_gene	0.813297	-2.19208	0.441023	-4.97045	6.6798e-07	2.65046e-06
RNU6-79P	ENSG00000199381	snRNA	0.745012	-2.19224	0.632461	-3.4662	0.000527869	0.00127556
Y_RNA	ENSG00000199200	misc_RNA	0.642036	-2.19233	0.845822	-2.59195	0.00954326	0.0180677
AC009948.3	ENSG00000279598	TEC	4.37004	-2.19298	0.318644	-6.88223	5.89242e-12	5.12713e-11
AC008751.1	ENSG00000268293	processed_pseudogene	0.645174	-2.19377	0.448225	-4.89434	9.86382e-07	3.80322e-06
ARHGAP22-IT1	ENSG00000248682	lncRNA	0.700964	-2.19386	0.501876	-4.37132	1.23499e-05	3.98799e-05
AC022872.1	ENSG00000261632	lncRNA	2.62347	-2.19389	0.265509	-8.26296	1.42106e-16	2.50187e-15
AC022960.2	ENSG00000276282	lncRNA	4.55829	-2.19428	0.225739	-9.7204	2.46812e-22	1.07505e-20
AC004672.1	ENSG00000249028	lncRNA	4.32938	-2.19522	0.257428	-8.52752	1.49521e-17	3.09568e-16
AC096638.2	ENSG00000229016	processed_pseudogene	0.597565	-2.19522	0.701209	-3.13063	0.00174433	0.00383327
AL359955.1	ENSG00000197550	unprocessed_pseudogene	4.1013	-2.19584	0.35132	-6.25027	4.09738e-10	2.70033e-09
PRSS48	ENSG00000189099	protein_coding	3.98056	-2.19605	0.288792	-7.60426	2.86541e-14	3.55553e-13
AC139792.1	ENSG00000271771	lncRNA	3.44273	-2.19612	0.282559	-7.77227	7.70946e-15	1.0437e-13
AC005304.2	ENSG00000265494	lncRNA	0.958485	-2.19643	0.359466	-6.11026	9.94678e-10	6.18503e-09
AF131215.4	ENSG00000254936	lncRNA	6.70959	-2.19757	0.200063	-10.9844	4.54445e-28	4.48117e-26
CHIAP2	ENSG00000203878	transcribed_unprocessed_pseudogene	70.776	-2.19986	0.258075	-8.52414	1.53949e-17	3.17994e-16
AC092120.1	ENSG00000261692	lncRNA	1.66283	-2.20127	0.280209	-7.85582	3.97179e-15	5.60385e-14
KCTD4	ENSG00000180332	protein_coding	5.73834	-2.20129	0.312245	-7.04988	1.79072e-12	1.68866e-11
RAC1P7	ENSG00000236101	processed_pseudogene	0.448753	-2.20149	1.22463	-1.79768	0.0722281	0.111012
AL109755.1	ENSG00000217231	processed_pseudogene	0.607816	-2.20163	0.969296	-2.27137	0.0231247	0.0402568
AC090617.8	ENSG00000279562	TEC	1.78433	-2.20186	0.330443	-6.66334	2.67677e-11	2.12346e-10
AC105206.1	ENSG00000177725	lncRNA	5.20646	-2.20194	0.272786	-8.07203	6.91365e-16	1.10084e-14
AC022601.1	ENSG00000268873	lncRNA	1.18098	-2.20233	0.427492	-5.15175	2.58061e-07	1.09896e-06
AL136979.1	ENSG00000227914	lncRNA	1.85084	-2.20253	0.277592	-7.93442	2.11482e-15	3.11321e-14
FGF14-IT1	ENSG00000243319	lncRNA	2.88916	-2.20263	0.287636	-7.65769	1.89313e-14	2.41273e-13
TRAJ37	ENSG00000278661	TR_J_gene	1.02675	-2.203	0.34207	-6.44021	1.19311e-10	8.56494e-10
AC073592.5	ENSG00000279121	TEC	2.66827	-2.20307	0.249041	-8.84621	9.05414e-19	2.27746e-17
AL157402.2	ENSG00000261573	lncRNA	1.40217	-2.20362	0.446279	-4.93776	7.90243e-07	3.09854e-06
AC092910.1	ENSG00000239835	processed_pseudogene	2.86033	-2.20511	0.295204	-7.46978	8.03291e-14	9.28377e-13
AP000676.3	ENSG00000279793	TEC	0.734976	-2.20517	0.475916	-4.63353	3.59478e-06	1.26547e-05
MIR181A2	ENSG00000207595	miRNA	1.35922	-2.20615	0.4605	-4.79078	1.66135e-06	6.15338e-06
AC034186.2	ENSG00000281863	snoRNA	0.918497	-2.20709	0.548322	-4.02518	5.69316e-05	0.000163844
RN7SL660P	ENSG00000278746	misc_RNA	1.47354	-2.20852	0.427939	-5.16083	2.45854e-07	1.05101e-06
AC021231.1	ENSG00000259336	lncRNA	2.59217	-2.20919	0.233054	-9.47929	2.56008e-21	9.57543e-20
RNU6-490P	ENSG00000199855	snRNA	0.639218	-2.21081	0.543339	-4.06893	4.72291e-05	0.000137802
Y_RNA	ENSG00000207488	misc_RNA	0.556647	-2.21102	1.16572	-1.8967	0.0578674	0.0912711
AC005084.1	ENSG00000271330	processed_pseudogene	0.562701	-2.21148	0.674018	-3.28104	0.00103423	0.00236645
SNRPGP18	ENSG00000257979	processed_pseudogene	2.46928	-2.21189	0.553962	-3.99285	6.52839e-05	0.000185705
HSPE1P27	ENSG00000235112	processed_pseudogene	3.41854	-2.21354	0.276033	-8.01912	1.06505e-15	1.63893e-14
DEFB108B	ENSG00000184276	protein_coding	0.775923	-2.21481	0.423208	-5.23339	1.66427e-07	7.33169e-07
RNU2-31P	ENSG00000252763	snRNA	0.936219	-2.2156	0.518493	-4.27315	1.9273e-05	6.01522e-05
AC022726.1	ENSG00000267766	lncRNA	0.686453	-2.21613	0.499321	-4.43828	9.06806e-06	2.99432e-05
AL034555.1	ENSG00000270620	unprocessed_pseudogene	1.47614	-2.21734	0.412311	-5.37784	7.53865e-08	3.50873e-07
TPRKBP2	ENSG00000260452	processed_pseudogene	2.61692	-2.21855	0.277174	-8.00418	1.20267e-15	1.83734e-14
AC009313.1	ENSG00000224467	lncRNA	1.45759	-2.21868	0.466801	-4.75295	2.00473e-06	7.33479e-06
C8orf17	ENSG00000250733	TEC	3.18335	-2.21907	0.291492	-7.61281	2.68203e-14	3.34479e-13
AC069029.1	ENSG00000259621	lncRNA	1.47459	-2.22014	0.419466	-5.29279	1.20467e-07	5.41918e-07
RGS5-AS1	ENSG00000232892	lncRNA	1.3609	-2.22154	0.33504	-6.63068	3.34135e-11	2.60604e-10
AC005920.2	ENSG00000249870	lncRNA	3.31541	-2.22159	0.27561	-8.06062	7.5907e-16	1.20005e-14
SRMP2	ENSG00000258485	processed_pseudogene	3.77975	-2.22185	0.255702	-8.68923	3.64895e-18	8.3304e-17
AC007161.2	ENSG00000270314	processed_pseudogene	2.41926	-2.22202	0.37476	-5.92918	3.04458e-09	1.7566e-08
AC073569.1	ENSG00000258044	lncRNA	2.71249	-2.22231	0.250936	-8.85608	8.28762e-19	2.1001e-17
MIR4427	ENSG00000265744	miRNA	0.849228	-2.22269	0.397639	-5.58972	2.27432e-08	1.14532e-07
LINC01819	ENSG00000231826	lncRNA	6.98133	-2.22418	0.196778	-11.303	1.26856e-29	1.56275e-27
MTCO3P11	ENSG00000237711	unprocessed_pseudogene	2.35891	-2.22487	0.266366	-8.3527	6.67173e-17	1.23421e-15
Y_RNA	ENSG00000199962	misc_RNA	0.919206	-2.22554	0.416113	-5.3484	8.87332e-08	4.08334e-07
ADAMTS7P3	ENSG00000261143	transcribed_unprocessed_pseudogene	56.5258	-2.22637	0.158062	-14.0854	4.66902e-45	4.23757e-42
RPS20P15	ENSG00000227523	processed_pseudogene	2.76846	-2.22661	0.30782	-7.23349	4.70747e-13	4.85394e-12
AL031428.1	ENSG00000240553	lncRNA	1.52366	-2.22721	0.384562	-5.79156	6.97347e-09	3.80101e-08
EIF1AX-AS1	ENSG00000225037	lncRNA	4.16606	-2.22768	0.23966	-9.29518	1.46961e-20	4.87371e-19
SDCBPP1	ENSG00000226705	processed_pseudogene	3.109	-2.22805	0.248855	-8.95322	3.45269e-19	9.22766e-18
TRAJ19	ENSG00000211870	TR_J_gene	1.11153	-2.2288	0.338087	-6.59238	4.32827e-11	3.31703e-10
SNORD116-1	ENSG00000207063	snoRNA	1.30381	-2.23002	0.335485	-6.64714	2.98846e-11	2.34893e-10
OR52U1P	ENSG00000232381	unprocessed_pseudogene	0.720259	-2.23037	0.473509	-4.7103	2.47352e-06	8.93385e-06
RN7SL200P	ENSG00000265123	misc_RNA	2.69877	-2.2308	0.262343	-8.50337	1.84163e-17	3.74148e-16
AC091588.1	ENSG00000264012	lncRNA	4.48869	-2.23086	0.204083	-10.9311	8.18242e-28	7.86055e-26
AL355613.1	ENSG00000227215	lncRNA	1.83025	-2.23112	0.273806	-8.14855	3.6832e-16	6.08919e-15
KIRREL1-IT1	ENSG00000226520	lncRNA	2.37372	-2.23146	0.29371	-7.59748	3.01945e-14	3.73418e-13
HSPE1P25	ENSG00000232015	processed_pseudogene	1.22864	-2.23163	0.347644	-6.4193	1.36902e-10	9.74287e-10
AL390783.1	ENSG00000235020	lncRNA	3.01616	-2.23239	0.238205	-9.3717	7.13763e-21	2.46448e-19
AC034105.3	ENSG00000259950	processed_pseudogene	2.84243	-2.23278	0.30714	-7.26959	3.60577e-13	3.78555e-12
HNRNPA1P76	ENSG00000255141	processed_pseudogene	2.9698	-2.23363	0.267294	-8.35645	6.46357e-17	1.1992e-15
AC026461.3	ENSG00000260823	lncRNA	1.03888	-2.23375	0.422307	-5.28941	1.22711e-07	5.51513e-07
AC004672.2	ENSG00000267285	lncRNA	1.53729	-2.23393	0.31452	-7.10265	1.22385e-12	1.18191e-11
RN7SL451P	ENSG00000265141	misc_RNA	0.783632	-2.23403	0.502987	-4.44151	8.9328e-06	2.95338e-05
OR13D1	ENSG00000179055	protein_coding	0.693335	-2.23486	0.496551	-4.50077	6.77079e-06	2.28131e-05
B3GALNT1P1	ENSG00000229948	processed_pseudogene	3.0305	-2.23547	0.306926	-7.28342	3.25467e-13	3.43475e-12
MIR1255A	ENSG00000221265	miRNA	1.49584	-2.23582	0.359731	-6.21527	5.12365e-10	3.32933e-09
AC025040.1	ENSG00000259188	lncRNA	3.30412	-2.23612	0.242542	-9.21949	2.98512e-20	9.40851e-19
AP003072.5	ENSG00000280379	TEC	4.18319	-2.23612	0.239146	-9.35045	8.72792e-21	2.9766e-19
AC125437.2	ENSG00000279474	TEC	1.87155	-2.23732	0.26365	-8.48595	2.13958e-17	4.2861e-16
PPP1R11P2	ENSG00000231765	processed_pseudogene	1.03804	-2.23821	0.391445	-5.71783	1.07893e-08	5.72003e-08
RNU6-761P	ENSG00000206875	snRNA	2.7241	-2.23945	0.291349	-7.68649	1.51221e-14	1.95611e-13
AKT3-IT1	ENSG00000228939	lncRNA	2.77173	-2.24036	0.283526	-7.90178	2.74942e-15	3.96858e-14
GPC6-AS1	ENSG00000236520	lncRNA	1.18697	-2.24137	0.53379	-4.19897	2.68137e-05	8.17033e-05
AL163193.1	ENSG00000237088	processed_pseudogene	2.68829	-2.24221	0.35386	-6.33644	2.35142e-10	1.61302e-09
ATP8A2P2	ENSG00000229800	processed_pseudogene	4.25834	-2.24332	0.225636	-9.94223	2.72652e-23	1.38102e-21
U3	ENSG00000199856	snoRNA	0.729737	-2.24424	0.601836	-3.72899	0.000192252	0.000504176
LINC01331	ENSG00000248673	lncRNA	2.16978	-2.24474	0.329283	-6.81705	9.29316e-12	7.85713e-11
TRAJ30	ENSG00000211859	TR_J_gene	0.62488	-2.24539	0.612794	-3.66418	0.000248129	0.00063715
SNORA2C	ENSG00000221491	snoRNA	8.96255	-2.2456	0.189041	-11.8789	1.52299e-32	2.79878e-30
AC046158.2	ENSG00000261837	lncRNA	2.91791	-2.24589	0.26656	-8.42548	3.59288e-17	6.929e-16
TRAJ12	ENSG00000211877	TR_J_gene	1.25747	-2.2462	0.293575	-7.6512	1.9912e-14	2.53079e-13
RNA5SP295	ENSG00000199525	rRNA_pseudogene	0.738171	-2.2467	0.640057	-3.51015	0.000447849	0.00109607
MIR599	ENSG00000207804	miRNA	0.64715	-2.24694	0.804177	-2.79409	0.00520463	0.0104243
AC023509.5	ENSG00000275488	processed_pseudogene	3.81191	-2.24782	0.254219	-8.84209	9.39465e-19	2.35778e-17
RPS29P22	ENSG00000240873	processed_pseudogene	1.41595	-2.24783	0.353993	-6.34993	2.15413e-10	1.48801e-09
RN7SL672P	ENSG00000239742	misc_RNA	1.72014	-2.24828	0.336653	-6.67832	2.41701e-11	1.92495e-10
RPL34P21	ENSG00000244451	processed_pseudogene	1.95772	-2.24838	0.306185	-7.3432	2.08543e-13	2.26756e-12
TAS2R50	ENSG00000212126	protein_coding	3.42045	-2.24845	0.274426	-8.19328	2.54194e-16	4.32294e-15
NPM1P43	ENSG00000259440	processed_pseudogene	1.2223	-2.24971	0.304177	-7.39605	1.40293e-13	1.56958e-12
MIR1284	ENSG00000221264	miRNA	0.794504	-2.25017	0.450645	-4.99322	5.93807e-07	2.37844e-06
RN7SL18P	ENSG00000241625	misc_RNA	0.691668	-2.2502	0.463771	-4.85196	1.2225e-06	4.64e-06
RUNX2-AS1	ENSG00000261080	lncRNA	1.02617	-2.25022	0.424213	-5.30445	1.13011e-07	5.10444e-07
SETP10	ENSG00000231905	processed_pseudogene	2.39659	-2.2506	0.385716	-5.83485	5.38379e-09	2.99397e-08
OR52B6	ENSG00000187747	protein_coding	1.22593	-2.25063	0.36227	-6.21257	5.21235e-10	3.38103e-09
AC012048.1	ENSG00000278992	TEC	0.585025	-2.25145	0.781067	-2.88253	0.00394495	0.00808963
RNU6-1034P	ENSG00000202205	snRNA	0.746218	-2.25174	0.780693	-2.88428	0.00392307	0.00805071
HMGN1P10	ENSG00000244101	processed_pseudogene	0.718045	-2.25218	0.582025	-3.86956	0.00010903	0.000298368
ITCH-IT1	ENSG00000231795	lncRNA	3.13293	-2.25222	0.245698	-9.16662	4.88089e-20	1.48673e-18
RNU6-786P	ENSG00000252658	snRNA	0.904278	-2.25229	0.43234	-5.20953	1.89323e-07	8.26339e-07
RPL36AP41	ENSG00000242087	processed_pseudogene	2.10238	-2.25275	0.320118	-7.03724	1.96082e-12	1.83698e-11
AC025281.1	ENSG00000261234	processed_pseudogene	0.77104	-2.25283	0.679412	-3.31586	0.000913621	0.00210958
AC011447.5	ENSG00000274612	processed_pseudogene	0.96548	-2.25315	0.414548	-5.4352	5.47361e-08	2.60233e-07
AC130462.1	ENSG00000201850	misc_RNA	0.676651	-2.25346	0.685225	-3.28865	0.0010067	0.00230667
CYP4Z2P	ENSG00000154198	transcribed_unprocessed_pseudogene	45.7278	-2.25413	0.200958	-11.2169	3.36918e-29	3.8617e-27
RNU1-136P	ENSG00000206908	snRNA	0.6151	-2.25538	0.810241	-2.78359	0.00537603	0.0107324
OR1L6	ENSG00000171459	protein_coding	0.630982	-2.25557	0.649971	-3.47026	0.000519953	0.00125752
AC008957.2	ENSG00000274441	lncRNA	1.90577	-2.25593	0.373638	-6.03774	1.56285e-09	9.43312e-09
Z86062.1	ENSG00000220695	processed_pseudogene	3.81128	-2.25674	0.229972	-9.81307	9.89083e-23	4.5867e-21
RN7SL554P	ENSG00000240936	misc_RNA	0.678891	-2.2576	0.583295	-3.87042	0.000108649	0.000297472
SNORA70G	ENSG00000206650	snoRNA	2.2993	-2.25781	0.367127	-6.14995	7.75096e-10	4.8998e-09
RNU6ATAC	ENSG00000221676	snRNA	4.48084	-2.25793	0.232174	-9.72518	2.35493e-22	1.02978e-20
RN7SL459P	ENSG00000240993	misc_RNA	1.11469	-2.25851	0.320221	-7.05298	1.75132e-12	1.65396e-11
AC092612.1	ENSG00000248521	processed_pseudogene	1.76663	-2.25853	0.393693	-5.73678	9.64915e-09	5.14652e-08
FBXO36-IT1	ENSG00000231534	lncRNA	1.07387	-2.25869	0.343226	-6.58077	4.68009e-11	3.56942e-10
AC007731.3	ENSG00000236003	lncRNA	2.70371	-2.25905	0.263805	-8.56331	1.09675e-17	2.31489e-16
AC100793.1	ENSG00000239671	processed_pseudogene	1.63388	-2.25933	0.283814	-7.9606	1.71204e-15	2.55154e-14
AP000919.2	ENSG00000266397	lncRNA	4.27137	-2.26075	0.279928	-8.07617	6.6831e-16	1.06642e-14
AC087465.1	ENSG00000259722	processed_pseudogene	0.931542	-2.26093	0.56827	-3.97862	6.93178e-05	0.000196138
SEC24AP1	ENSG00000267361	processed_pseudogene	5.03477	-2.2637	0.204411	-11.0743	1.67274e-28	1.71801e-26
RMRP	ENSG00000269900	lncRNA	6.72189	-2.26375	0.465303	-4.86511	1.14394e-06	4.3608e-06
UBE2V1P15	ENSG00000217680	processed_pseudogene	0.942481	-2.26379	0.421187	-5.3748	7.66684e-08	3.56131e-07
AC105910.1	ENSG00000241026	unprocessed_pseudogene	1.01469	-2.26549	0.421528	-5.37446	7.6814e-08	3.56733e-07
RNU6-724P	ENSG00000212260	snRNA	1.56778	-2.26724	0.288602	-7.85596	3.96729e-15	5.59928e-14
AL136982.3	ENSG00000237280	lncRNA	3.72645	-2.26759	0.246681	-9.19239	3.8422e-20	1.18991e-18
HIGD1AP16	ENSG00000219608	processed_pseudogene	2.59526	-2.26787	0.264174	-8.58476	9.10256e-18	1.94526e-16
AC005086.1	ENSG00000252824	snoRNA	0.800107	-2.26819	0.651117	-3.48354	0.000494825	0.00120165
AC104809.1	ENSG00000223991	lncRNA	10.8856	-2.26874	0.208912	-10.8598	1.79088e-27	1.62999e-25
MTND1P9	ENSG00000228995	processed_pseudogene	1.83427	-2.26903	0.353534	-6.41815	1.37936e-10	9.81173e-10
AC139451.1	ENSG00000244730	processed_pseudogene	2.20067	-2.2696	0.321826	-7.05224	1.76055e-12	1.66196e-11
SNORD116-19	ENSG00000207460	snoRNA	0.942183	-2.26963	0.472019	-4.80833	1.52195e-06	5.6701e-06
MTND1P6	ENSG00000254346	processed_pseudogene	0.623759	-2.27017	0.726585	-3.12444	0.00178145	0.00390789
C18orf15	ENSG00000279020	TEC	2.7242	-2.27019	0.298395	-7.608	2.78369e-14	3.46283e-13
RN7SL16P	ENSG00000243005	misc_RNA	1.89388	-2.27023	0.37832	-6.00081	1.9633e-09	1.16462e-08
RN7SL715P	ENSG00000272096	misc_RNA	1.0192	-2.27041	0.518869	-4.37568	1.21054e-05	3.91587e-05
AC007598.2	ENSG00000261394	lncRNA	2.20901	-2.27043	0.280446	-8.09577	5.69034e-16	9.14898e-15
NPM1P30	ENSG00000228219	processed_pseudogene	1.94543	-2.27189	0.302896	-7.50056	6.35471e-14	7.45664e-13
AC009152.1	ENSG00000275927	lncRNA	2.20053	-2.27261	0.292707	-7.76411	8.22202e-15	1.10669e-13
RAP1BP3	ENSG00000219703	processed_pseudogene	0.953008	-2.2727	0.406364	-5.59277	2.23472e-08	1.12691e-07
HSPE1P26	ENSG00000220867	processed_pseudogene	2.55569	-2.27275	0.272097	-8.35273	6.67009e-17	1.23421e-15
HMGN1P2	ENSG00000229046	processed_pseudogene	1.64776	-2.2728	0.295464	-7.6923	1.44513e-14	1.8737e-13
SLC10A2	ENSG00000125255	protein_coding	18.9762	-2.27326	0.338857	-6.7086	1.96502e-11	1.58888e-10
AC113385.1	ENSG00000249787	lncRNA	1.00067	-2.27382	0.376286	-6.0428	1.51463e-09	9.1582e-09
MIR581	ENSG00000207627	miRNA	1.66788	-2.27436	0.345032	-6.59174	4.34692e-11	3.33017e-10
RN7SL564P	ENSG00000240606	misc_RNA	2.1759	-2.27461	0.447472	-5.08325	3.71027e-07	1.53735e-06
RPL9P30	ENSG00000240074	processed_pseudogene	2.47085	-2.2747	0.284889	-7.98453	1.41063e-15	2.13018e-14
SNORA70E	ENSG00000207221	snoRNA	0.606411	-2.27596	0.823402	-2.7641	0.00570806	0.0113315
MIR1205	ENSG00000221771	miRNA	1.50236	-2.27643	0.355332	-6.4065	1.48902e-10	1.05295e-09
Y_RNA	ENSG00000200118	misc_RNA	0.840347	-2.27659	0.482054	-4.72268	2.32757e-06	8.43274e-06
IQCJ-SCHIP1-AS1	ENSG00000241211	lncRNA	3.04453	-2.27732	0.291942	-7.80059	6.16206e-15	8.42938e-14
SRMP3	ENSG00000229173	processed_pseudogene	1.06972	-2.27779	0.376245	-6.054	1.4129e-09	8.57923e-09
AC129502.1	ENSG00000280321	TEC	1.79282	-2.2785	0.338035	-6.74042	1.57931e-11	1.29465e-10
MYL1	ENSG00000168530	protein_coding	0.973178	-2.27865	0.542756	-4.19829	2.68939e-05	8.19196e-05
AC090950.2	ENSG00000279465	TEC	2.34633	-2.2795	0.242289	-9.40819	5.04771e-21	1.7826e-19
AC006116.6	ENSG00000267298	lncRNA	3.31432	-2.27981	0.22686	-10.0494	9.23986e-24	4.93888e-22
AC079336.4	ENSG00000266599	lncRNA	1.99461	-2.28026	0.29958	-7.61149	2.70943e-14	3.37613e-13
AC079905.2	ENSG00000257146	processed_pseudogene	0.857692	-2.28063	0.414842	-5.49758	3.85036e-08	1.86915e-07
RPL7L1P12	ENSG00000231981	processed_pseudogene	1.80009	-2.28072	0.314576	-7.25013	4.16387e-13	4.32956e-12
AC010776.1	ENSG00000267269	lncRNA	0.744499	-2.28078	0.627401	-3.63528	0.000277677	0.000706617
AC087749.1	ENSG00000264270	lncRNA	4.74196	-2.28129	0.225194	-10.1303	4.05249e-24	2.30169e-22
AC011120.1	ENSG00000264196	lncRNA	3.80425	-2.28174	0.289331	-7.88625	3.11405e-15	4.46016e-14
RNA5-8SP4	ENSG00000201966	rRNA_pseudogene	0.453601	-2.28193	2.45616	-0.929066	0.352855	0.434529
Y_RNA	ENSG00000206779	misc_RNA	1.46517	-2.28213	0.475919	-4.79521	1.62506e-06	6.0255e-06
SLC25A6P3	ENSG00000232846	processed_pseudogene	0.843593	-2.28252	0.481893	-4.73658	2.1735e-06	7.91322e-06
SNORD113-1	ENSG00000202191	snoRNA	0.659066	-2.28279	0.867034	-2.63287	0.00846663	0.0162234
AC008810.1	ENSG00000212567	snoRNA	1.84868	-2.28305	0.347999	-6.56052	5.36218e-11	4.05349e-10
AP001825.1	ENSG00000254787	lncRNA	0.954352	-2.28366	0.532316	-4.29004	1.78643e-05	5.6094e-05
AC015871.4	ENSG00000279394	TEC	3.77586	-2.28434	0.225532	-10.1287	4.1228e-24	2.33864e-22
AP000753.2	ENSG00000256789	lncRNA	4.51683	-2.2844	0.225629	-10.1246	4.29764e-24	2.42544e-22
FAM96AP1	ENSG00000234048	processed_pseudogene	0.581301	-2.28471	0.957788	-2.3854	0.0170606	0.0306059
RNU6-653P	ENSG00000199944	snRNA	0.814875	-2.28513	0.44026	-5.19041	2.09828e-07	9.08083e-07
RN7SL575P	ENSG00000277591	misc_RNA	0.706659	-2.28596	0.574274	-3.98061	6.87373e-05	0.000194681
THRB-IT1	ENSG00000224822	lncRNA	4.70958	-2.28692	0.23312	-9.81004	1.01931e-22	4.71527e-21
ALDOB	ENSG00000136872	protein_coding	90.1594	-2.28697	0.180761	-12.6519	1.09201e-36	3.65142e-34
RN7SL408P	ENSG00000266875	misc_RNA	1.30903	-2.2874	0.494589	-4.62486	3.74859e-06	1.31535e-05
RNU6-876P	ENSG00000212597	snRNA	1.21869	-2.2875	0.40229	-5.68619	1.29904e-08	6.79738e-08
RNU11-6P	ENSG00000212429	snRNA	0.569704	-2.28762	0.627558	-3.64528	0.000267104	0.000681702
GRK5-IT1	ENSG00000228485	lncRNA	3.76152	-2.28765	0.271513	-8.42559	3.58937e-17	6.92788e-16
AL512785.1	ENSG00000227094	lncRNA	1.15255	-2.28843	0.406485	-5.62979	1.8043e-08	9.23369e-08
RPL37P18	ENSG00000229235	processed_pseudogene	1.88729	-2.28847	0.475692	-4.81083	1.50309e-06	5.60371e-06
AC008871.1	ENSG00000250383	lncRNA	1.00733	-2.29007	0.434154	-5.27479	1.32906e-07	5.94565e-07
AC009268.1	ENSG00000259505	processed_pseudogene	2.14691	-2.29022	0.32702	-7.00331	2.49985e-12	2.30431e-11
RN7SL314P	ENSG00000244402	misc_RNA	0.678952	-2.29073	0.810991	-2.82461	0.00473384	0.00955187
SNORA47	ENSG00000238961	snoRNA	4.94993	-2.29098	0.220199	-10.4041	2.37397e-25	1.6143e-23
PLCE1-AS2	ENSG00000232913	lncRNA	2.50344	-2.29156	0.320691	-7.14567	8.95554e-13	8.82106e-12
AC012613.1	ENSG00000248647	lncRNA	0.967905	-2.2916	0.404349	-5.66738	1.44999e-08	7.5235e-08
AL132992.1	ENSG00000252800	scaRNA	1.01938	-2.29164	0.624639	-3.66874	0.00024375	0.000626701
GAPDHP42	ENSG00000219881	processed_pseudogene	5.41769	-2.29241	0.208828	-10.9775	4.90313e-28	4.81351e-26
SNORA28	ENSG00000272533	snoRNA	6.23191	-2.2932	0.208165	-11.0163	3.19054e-28	3.20293e-26
Z97055.1	ENSG00000233157	processed_pseudogene	0.949466	-2.29382	0.362391	-6.32968	2.45671e-10	1.6811e-09
AC074124.1	ENSG00000249049	lncRNA	1.51066	-2.29433	0.639061	-3.59016	0.000330479	0.000829593
SNORA53	ENSG00000212443	snoRNA	21.3158	-2.29546	0.200941	-11.4235	3.18937e-30	4.42774e-28
AC015920.1	ENSG00000278972	TEC	2.66188	-2.29555	0.297961	-7.70419	1.31673e-14	1.71723e-13
AL512430.2	ENSG00000217041	processed_pseudogene	1.60137	-2.296	0.369499	-6.21383	5.17078e-10	3.35826e-09
AC234772.2	ENSG00000269902	lncRNA	5.50035	-2.29684	0.248028	-9.26042	2.03624e-20	6.609e-19
AC060234.3	ENSG00000241577	lncRNA	2.0727	-2.29773	0.279877	-8.20979	2.21575e-16	3.79726e-15
AC012513.2	ENSG00000236478	processed_pseudogene	4.16921	-2.2984	0.225981	-10.1708	2.67794e-24	1.56291e-22
Y_RNA	ENSG00000222767	misc_RNA	0.859285	-2.29848	0.820204	-2.80233	0.00507356	0.0101851
Z93242.1	ENSG00000226153	processed_pseudogene	1.33804	-2.30059	0.313022	-7.3496	1.98794e-13	2.16685e-12
RTRAFP1	ENSG00000225496	processed_pseudogene	2.88656	-2.30138	0.287388	-8.0079	1.16686e-15	1.78571e-14
RNU6-1190P	ENSG00000222743	snRNA	0.910578	-2.30198	0.518104	-4.44309	8.86773e-06	2.93296e-05
AL138963.2	ENSG00000270381	processed_pseudogene	0.893166	-2.30257	0.400247	-5.75287	8.77434e-09	4.71556e-08
AC006355.1	ENSG00000229110	processed_pseudogene	0.645489	-2.30259	0.740002	-3.1116	0.00186075	0.0040658
H3P3	ENSG00000234202	processed_pseudogene	0.617441	-2.30266	0.65519	-3.5145	0.000440585	0.00108002
FNTAP2	ENSG00000230022	processed_pseudogene	3.11834	-2.30278	0.259481	-8.87457	7.0206e-19	1.79947e-17
MORF4L1P5	ENSG00000231857	processed_pseudogene	0.661843	-2.30371	0.585198	-3.93664	8.263e-05	0.000230911
KATNBL1P2	ENSG00000232857	processed_pseudogene	1.52643	-2.30415	0.371206	-6.2072	5.3936e-10	3.48794e-09
AC066616.2	ENSG00000259600	processed_pseudogene	0.774972	-2.30424	0.519786	-4.43305	9.29094e-06	3.06132e-05
MRPL42P6	ENSG00000242810	processed_pseudogene	0.543278	-2.30478	0.733665	-3.14146	0.00168109	0.00370619
GYPB	ENSG00000250361	protein_coding	0.702185	-2.3048	0.41884	-5.50282	3.73755e-08	1.81955e-07
RN7SKP273	ENSG00000223324	misc_RNA	1.22687	-2.30491	0.311791	-7.39248	1.4412e-13	1.60876e-12
AC005828.1	ENSG00000226797	lncRNA	4.54731	-2.30692	0.245207	-9.40804	5.05455e-21	1.7826e-19
RPL31P58	ENSG00000243053	processed_pseudogene	3.85067	-2.30736	0.271286	-8.50526	1.81182e-17	3.68428e-16
RN7SL300P	ENSG00000265813	misc_RNA	1.23519	-2.30749	0.384967	-5.994	2.04746e-09	1.2118e-08
GPR79	ENSG00000232374	processed_pseudogene	2.20469	-2.30757	0.281004	-8.21188	2.17755e-16	3.73756e-15
SNORA11B	ENSG00000221102	snoRNA	1.50899	-2.30865	0.383095	-6.0263	1.67753e-09	1.0076e-08
AC015845.1	ENSG00000264914	lncRNA	3.92306	-2.30888	0.238808	-9.66835	4.10957e-22	1.73562e-20
RN7SL127P	ENSG00000242175	misc_RNA	2.25693	-2.30916	0.392442	-5.88407	4.00292e-09	2.26861e-08
AL450344.2	ENSG00000226599	lncRNA	2.5828	-2.30977	0.318579	-7.25022	4.16099e-13	4.3286e-12
AC018445.4	ENSG00000279981	TEC	2.45622	-2.3105	0.269996	-8.55752	1.15326e-17	2.42495e-16
AP001207.1	ENSG00000253153	processed_pseudogene	2.4045	-2.31201	0.332768	-6.9478	3.71017e-12	3.32726e-11
Y_RNA	ENSG00000201228	misc_RNA	0.791808	-2.31227	0.79881	-2.89465	0.00379587	0.00781347
REG4	ENSG00000134193	protein_coding	307.025	-2.31296	0.331318	-6.98109	2.92906e-12	2.66972e-11
COX7BP2	ENSG00000234274	processed_pseudogene	1.31634	-2.31315	0.369027	-6.26825	3.65134e-10	2.42616e-09
RN7SL555P	ENSG00000263905	misc_RNA	0.957285	-2.314	0.434839	-5.32152	1.02904e-07	4.68265e-07
AL360169.2	ENSG00000274023	lncRNA	2.09062	-2.31412	0.299276	-7.73238	1.05551e-14	1.39621e-13
RNU6-130P	ENSG00000223044	snRNA	3.11436	-2.31441	0.242676	-9.53701	1.47003e-21	5.64066e-20
RPL17P40	ENSG00000241067	processed_pseudogene	1.61381	-2.31446	0.332105	-6.96905	3.19097e-12	2.89137e-11
SNORD116-18	ENSG00000206688	snoRNA	0.708276	-2.31504	0.63494	-3.64607	0.000266277	0.000679785
MIR1296	ENSG00000221063	miRNA	1.64766	-2.31534	0.36558	-6.33335	2.39897e-10	1.64437e-09
RNU7-195P	ENSG00000239151	snRNA	0.693886	-2.31561	0.713436	-3.24571	0.00117157	0.00265623
RNU6-862P	ENSG00000199674	snRNA	0.82531	-2.31571	0.597703	-3.87434	0.000106914	0.000293118
AC217773.1	ENSG00000238723	misc_RNA	1.01131	-2.31634	0.395527	-5.85634	4.73182e-09	2.65204e-08
RNU6-936P	ENSG00000206732	snRNA	0.753454	-2.31678	0.79182	-2.92589	0.00343467	0.00712738
ANGPTL7	ENSG00000171819	protein_coding	14.0309	-2.31784	0.182477	-12.7021	5.75803e-37	2.03231e-34
AL445489.1	ENSG00000237336	lncRNA	3.79228	-2.31881	0.274836	-8.43706	3.2542e-17	6.33075e-16
AC073592.7	ENSG00000279527	TEC	3.52992	-2.31884	0.244669	-9.47744	2.60609e-21	9.71485e-20
AL627311.1	ENSG00000236073	processed_pseudogene	1.55455	-2.32021	0.409753	-5.66246	1.49222e-08	7.72102e-08
DPPA2P1	ENSG00000223915	processed_pseudogene	0.576399	-2.32057	0.855578	-2.71228	0.00668221	0.0130671
FAM155A-IT1	ENSG00000227248	lncRNA	1.82724	-2.32125	0.38734	-5.99279	2.06269e-09	1.21984e-08
LHFPL3-AS1	ENSG00000226869	lncRNA	6.85261	-2.32171	0.219659	-10.5697	4.12011e-26	3.11917e-24
AL360169.1	ENSG00000238019	lncRNA	0.738089	-2.32327	0.533707	-4.35309	1.34234e-05	4.30898e-05
RN7SKP235	ENSG00000222594	misc_RNA	1.02774	-2.32448	0.400985	-5.79693	6.75396e-09	3.69086e-08
AL138847.2	ENSG00000278967	TEC	4.67762	-2.32617	0.264426	-8.79707	1.40437e-18	3.42407e-17
RNU6-188P	ENSG00000201077	snRNA	0.975337	-2.3272	0.349486	-6.65892	2.75854e-11	2.18312e-10
RPS27AP7	ENSG00000236549	processed_pseudogene	3.52892	-2.32746	0.28493	-8.16854	3.12134e-16	5.23227e-15
AC114967.1	ENSG00000248120	processed_pseudogene	0.724019	-2.32752	0.592793	-3.92636	8.62422e-05	0.000240296
AC131571.1	ENSG00000228061	lncRNA	3.97463	-2.32761	0.246921	-9.42652	4.23901e-21	1.51663e-19
AL513122.1	ENSG00000214651	processed_pseudogene	1.36013	-2.32775	0.332137	-7.00841	2.4105e-12	2.22776e-11
AC025280.1	ENSG00000260859	lncRNA	2.7197	-2.32869	0.269925	-8.62717	6.28884e-18	1.38249e-16
RN7SKP285	ENSG00000222069	misc_RNA	0.894043	-2.32879	0.422789	-5.50816	3.62599e-08	1.77028e-07
DLG2-AS2	ENSG00000255311	lncRNA	1.28005	-2.32947	0.390624	-5.96348	2.46928e-09	1.44283e-08
AC006023.2	ENSG00000270577	processed_pseudogene	2.06859	-2.32982	0.332119	-7.015	2.29941e-12	2.13218e-11
MTND5P32	ENSG00000259379	processed_pseudogene	1.04468	-2.33024	0.445278	-5.23323	1.6657e-07	7.33726e-07
ZDHHC4P1	ENSG00000238025	processed_pseudogene	3.78187	-2.33081	0.255968	-9.10588	8.55695e-20	2.5185e-18
Z99127.2	ENSG00000237249	processed_pseudogene	2.76622	-2.33205	0.297541	-7.83773	4.58775e-15	6.39581e-14
YWHAQP5	ENSG00000236564	processed_pseudogene	3.24191	-2.33207	0.300612	-7.75775	8.64506e-15	1.15942e-13
RN7SL334P	ENSG00000244618	misc_RNA	1.30348	-2.33432	0.373139	-6.25592	3.95183e-10	2.61371e-09
SCARNA11	ENSG00000251898	scaRNA	1.14758	-2.33444	0.405011	-5.76389	8.21968e-09	4.43349e-08
AC090753.1	ENSG00000254000	lncRNA	0.619682	-2.33609	0.644325	-3.62564	0.000288251	0.000731559
AC009145.2	ENSG00000260511	lncRNA	0.813782	-2.33733	0.425836	-5.4888	4.04679e-08	1.95853e-07
AC064874.1	ENSG00000222007	lncRNA	2.10518	-2.33744	0.351135	-6.6568	2.79854e-11	2.21099e-10
GPR52	ENSG00000203737	protein_coding	5.40325	-2.3379	0.251557	-9.29372	1.48991e-20	4.93735e-19
RNU6-91P	ENSG00000272439	snRNA	0.667519	-2.33836	0.591006	-3.95658	7.60309e-05	0.000213584
AC008015.1	ENSG00000258578	processed_pseudogene	0.665912	-2.33925	0.673704	-3.47223	0.000516158	0.00124903
AC018630.1	ENSG00000256400	processed_pseudogene	0.576766	-2.34048	0.740017	-3.16274	0.00156289	0.0034652
MIR3134	ENSG00000264354	miRNA	0.909881	-2.34121	0.448614	-5.21878	1.80109e-07	7.88521e-07
AC010301.1	ENSG00000241179	processed_pseudogene	0.973483	-2.34167	0.43383	-5.39765	6.75177e-08	3.16768e-07
RN7SL378P	ENSG00000265684	misc_RNA	0.906718	-2.3427	0.503826	-4.64983	3.32212e-06	1.176e-05
Y_RNA	ENSG00000201013	misc_RNA	0.940724	-2.34286	0.461524	-5.07635	3.84745e-07	1.58826e-06
AC108066.1	ENSG00000223373	lncRNA	0.987024	-2.34307	0.381686	-6.13873	8.31852e-10	5.237e-09
Y_RNA	ENSG00000200521	misc_RNA	0.711506	-2.34312	0.727967	-3.21871	0.00128768	0.00289761
LINC02789	ENSG00000231718	lncRNA	0.861269	-2.34316	0.542008	-4.32311	1.53845e-05	4.88248e-05
RPL5P13	ENSG00000242134	processed_pseudogene	2.10452	-2.34525	0.372877	-6.28961	3.18263e-10	2.13972e-09
AL161644.1	ENSG00000225632	lncRNA	1.44637	-2.3454	0.358254	-6.54676	5.87988e-11	4.42603e-10
RN7SKP40	ENSG00000253020	misc_RNA	0.643369	-2.34578	0.571297	-4.10606	4.02462e-05	0.000118902
AC000111.2	ENSG00000237974	processed_pseudogene	1.2277	-2.34612	0.343277	-6.83449	8.23e-12	7.00219e-11
AL365318.1	ENSG00000237993	lncRNA	2.1148	-2.34622	0.28012	-8.37578	5.48588e-17	1.0268e-15
RN7SKP37	ENSG00000201364	misc_RNA	0.786266	-2.34704	0.895047	-2.62225	0.0087351	0.0166796
AL021937.3	ENSG00000234626	lncRNA	1.41421	-2.34732	0.362359	-6.47788	9.30199e-11	6.78378e-10
AL359095.1	ENSG00000230001	lncRNA	2.81052	-2.34734	0.438336	-5.35511	8.55024e-08	3.94364e-07
NANOGP11	ENSG00000233464	lncRNA	0.619281	-2.34821	1.17693	-1.99521	0.0460204	0.0744767
AC016576.1	ENSG00000251423	lncRNA	1.3839	-2.3484	0.562264	-4.17668	2.95793e-05	8.95046e-05
AC048380.1	ENSG00000267762	lncRNA	0.973433	-2.34881	0.367639	-6.3889	1.67079e-10	1.17346e-09
AC012150.2	ENSG00000275278	lncRNA	2.74957	-2.34923	0.27645	-8.49786	1.93122e-17	3.9021e-16
RN7SKP231	ENSG00000200151	misc_RNA	0.626739	-2.35029	0.925418	-2.53971	0.0110946	0.0207214
AL158801.3	ENSG00000258455	lncRNA	3.41568	-2.3519	0.304602	-7.72124	1.15206e-14	1.51446e-13
AC110769.3	ENSG00000279957	TEC	2.72082	-2.35191	0.312799	-7.51892	5.52303e-14	6.52898e-13
AC005828.2	ENSG00000263501	lncRNA	2.89256	-2.35214	0.318953	-7.37458	1.64865e-13	1.82068e-12
LINC01332	ENSG00000250446	lncRNA	0.937861	-2.35215	0.506961	-4.6397	3.48917e-06	1.23092e-05
AC079416.3	ENSG00000279589	TEC	4.68761	-2.35381	0.219773	-10.7102	9.11407e-27	7.53385e-25
RN7SL151P	ENSG00000244230	misc_RNA	4.66884	-2.35393	0.413644	-5.69071	1.26511e-08	6.62995e-08
AC135507.2	ENSG00000275607	processed_pseudogene	0.94779	-2.35461	0.447843	-5.25767	1.45895e-07	6.4863e-07
XIAPP2	ENSG00000254843	processed_pseudogene	3.7546	-2.3551	0.273647	-8.60635	7.54235e-18	1.63382e-16
RN7SL288P	ENSG00000240767	misc_RNA	0.902705	-2.35545	0.445589	-5.28614	1.24925e-07	5.60953e-07
AC018645.2	ENSG00000251999	snoRNA	0.659708	-2.35593	0.592005	-3.97959	6.90351e-05	0.000195462
Metazoa_SRP	ENSG00000277118	misc_RNA	1.62441	-2.35594	0.404277	-5.82755	5.62483e-09	3.11827e-08
AC090617.1	ENSG00000236457	lncRNA	0.941503	-2.35607	0.381421	-6.17708	6.52973e-10	4.17167e-09
MIR2909	ENSG00000276326	miRNA	1.03975	-2.35906	0.441388	-5.34465	9.05911e-08	4.16152e-07
AC005828.7	ENSG00000271919	transcribed_processed_pseudogene	2.87956	-2.35976	0.292124	-8.07793	6.58776e-16	1.05234e-14
AC087257.1	ENSG00000248100	lncRNA	3.51939	-2.36094	0.335787	-7.03106	2.04968e-12	1.91539e-11
MIR624	ENSG00000207952	miRNA	1.63076	-2.36136	0.414649	-5.69484	1.23489e-08	6.48384e-08
AL136369.1	ENSG00000228027	lncRNA	3.12184	-2.36158	0.288681	-8.18059	2.8245e-16	4.77972e-15
AF213884.1	ENSG00000241981	processed_pseudogene	2.24632	-2.3618	0.276105	-8.55399	1.189e-17	2.49303e-16
KCND3-AS1	ENSG00000237556	lncRNA	0.932493	-2.36189	0.457764	-5.15963	2.47441e-07	1.05756e-06
MTND4P14	ENSG00000236254	unprocessed_pseudogene	2.26597	-2.362	0.29285	-8.06555	7.29067e-16	1.1559e-14
AC100778.1	ENSG00000263895	lncRNA	0.796891	-2.36288	0.586388	-4.02956	5.58819e-05	0.00016103
AC009951.4	ENSG00000279166	TEC	8.79117	-2.36391	0.208064	-11.3615	6.50517e-30	8.55911e-28
LAP3P1	ENSG00000220091	processed_pseudogene	0.757988	-2.36401	0.592892	-3.98724	6.68457e-05	0.000189783
SNORA72	ENSG00000200355	snoRNA	1.22269	-2.36405	0.469685	-5.03327	4.82179e-07	1.95992e-06
AL078645.1	ENSG00000230470	lncRNA	4.0924	-2.36407	0.230667	-10.2489	1.1974e-24	7.35506e-23
RN7SKP230	ENSG00000202512	misc_RNA	1.81287	-2.36456	0.329424	-7.17786	7.08123e-13	7.10903e-12
AC009153.1	ENSG00000240861	processed_pseudogene	1.49458	-2.36462	0.432962	-5.4615	4.72123e-08	2.26521e-07
LINC02753	ENSG00000248844	lncRNA	0.917891	-2.36464	0.458479	-5.15758	2.50165e-07	1.0681e-06
RN7SL471P	ENSG00000263426	misc_RNA	0.686607	-2.36466	0.588367	-4.01902	5.84403e-05	0.000167805
RNU6-1003P	ENSG00000252908	snRNA	1.02881	-2.36474	0.582095	-4.06247	4.85558e-05	0.000141376
DIAPH3-AS2	ENSG00000223815	lncRNA	0.589857	-2.36533	0.743722	-3.1804	0.00147074	0.00327591
AC003989.1	ENSG00000227948	processed_pseudogene	2.05096	-2.36586	0.534657	-4.425	9.6443e-06	3.16955e-05
RN7SKP35	ENSG00000253019	misc_RNA	0.710247	-2.36614	0.727959	-3.25038	0.00115252	0.00261704
TRAJ21	ENSG00000211868	TR_J_gene	0.981524	-2.36705	0.411158	-5.75703	8.5605e-09	4.60453e-08
RN7SL413P	ENSG00000242893	misc_RNA	0.687383	-2.36743	0.662344	-3.57432	0.000351136	0.000876895
RNU7-169P	ENSG00000238457	snRNA	0.635792	-2.3679	0.949964	-2.49262	0.0126804	0.0233943
AL731577.1	ENSG00000226899	lncRNA	3.83582	-2.36904	0.275403	-8.6021	7.82736e-18	1.69062e-16
RN7SL448P	ENSG00000264322	misc_RNA	1.02445	-2.36955	0.351374	-6.74367	1.5444e-11	1.26767e-10
RN7SL321P	ENSG00000277483	misc_RNA	0.881128	-2.36969	0.444388	-5.33248	9.68815e-08	4.42898e-07
AL031593.1	ENSG00000279597	lncRNA	1.08143	-2.3701	0.417873	-5.67183	1.41279e-08	7.34765e-08
AP003696.1	ENSG00000253385	lncRNA	4.67956	-2.3707	0.303046	-7.82292	5.16138e-15	7.15737e-14
AC011595.1	ENSG00000257438	lncRNA	3.4769	-2.37114	0.318988	-7.43333	1.05898e-13	1.20356e-12
HMGN1P12	ENSG00000247911	processed_pseudogene	1.66406	-2.3724	0.356652	-6.65187	2.89395e-11	2.2811e-10
AC022080.2	ENSG00000256159	processed_pseudogene	1.52107	-2.37353	0.373772	-6.35021	2.15022e-10	1.48555e-09
AC084024.2	ENSG00000248585	processed_pseudogene	2.0849	-2.3741	0.295692	-8.02895	9.83075e-16	1.51909e-14
AF107885.2	ENSG00000259103	lncRNA	2.05334	-2.37448	0.367789	-6.45609	1.07445e-10	7.75572e-10
AL390840.1	ENSG00000227521	processed_pseudogene	1.55406	-2.37448	0.420735	-5.64365	1.66485e-08	8.55846e-08
BICRA-AS1	ENSG00000269806	lncRNA	4.65474	-2.37453	0.248815	-9.54338	1.38256e-21	5.32341e-20
RPL26P35	ENSG00000244229	processed_pseudogene	3.70564	-2.37478	0.237801	-9.98641	1.74799e-23	9.03912e-22
MIR4524B	ENSG00000265331	miRNA	0.879831	-2.37525	0.400705	-5.92768	3.07252e-09	1.7718e-08
CENPUP2	ENSG00000258546	processed_pseudogene	3.2605	-2.3754	0.229442	-10.3529	4.05807e-25	2.66968e-23
AC016954.1	ENSG00000258134	processed_pseudogene	1.50803	-2.37599	0.382371	-6.21382	5.1712e-10	3.35826e-09
AC024382.1	ENSG00000253573	lncRNA	1.27212	-2.37631	0.480097	-4.94966	7.43442e-07	2.92846e-06
FABP5P15	ENSG00000237106	processed_pseudogene	0.614392	-2.37698	1.06136	-2.23955	0.0251203	0.0433457
AC006254.3	ENSG00000271137	processed_pseudogene	1.43618	-2.37782	0.31023	-7.6647	1.79256e-14	2.29275e-13
ATP5MC2P3	ENSG00000230482	processed_pseudogene	3.82397	-2.37836	0.245688	-9.68042	3.65197e-22	1.55268e-20
RNU6-1303P	ENSG00000201711	snRNA	0.679722	-2.37959	1.15484	-2.06053	0.0393482	0.0647486
SNORA62	ENSG00000201542	snoRNA	0.777666	-2.37965	0.600162	-3.96501	7.33931e-05	0.000206683
AC104984.3	ENSG00000265739	lncRNA	3.89481	-2.37993	0.255522	-9.314	1.23102e-20	4.13176e-19
Y_RNA	ENSG00000201627	misc_RNA	0.650036	-2.38117	0.954877	-2.49369	0.0126421	0.0233313
Y_RNA	ENSG00000200754	misc_RNA	0.716516	-2.38135	0.686085	-3.47093	0.000518658	0.00125467
ATP5MFP6	ENSG00000261102	processed_pseudogene	0.678605	-2.38146	0.655658	-3.63217	0.000281043	0.000714569
AC027335.2	ENSG00000279698	TEC	0.653862	-2.38165	0.89675	-2.65587	0.00791045	0.0152463
AC020661.3	ENSG00000259617	lncRNA	4.42764	-2.38194	0.226305	-10.5254	6.60154e-26	4.88492e-24
AC022001.1	ENSG00000270531	processed_pseudogene	1.96256	-2.38258	0.352293	-6.76306	1.35111e-11	1.11851e-10
SNORA73	ENSG00000199977	snoRNA	1.75993	-2.3826	0.306142	-7.78266	7.10158e-15	9.65144e-14
RN7SL246P	ENSG00000265093	misc_RNA	1.87733	-2.38261	0.290113	-8.21267	2.16322e-16	3.71583e-15
NCKAP5-AS1	ENSG00000233729	lncRNA	1.36811	-2.38286	0.420219	-5.67053	1.42359e-08	7.40032e-08
AL392103.1	ENSG00000225118	processed_pseudogene	0.609783	-2.38296	0.854739	-2.78793	0.00530454	0.0106067
MIR4637	ENSG00000264792	miRNA	0.826712	-2.38469	0.591179	-4.03379	5.48854e-05	0.000158374
AC120349.3	ENSG00000279707	TEC	4.53217	-2.38492	0.260336	-9.16093	5.14521e-20	1.56296e-18
KCNMA1-AS2	ENSG00000225497	lncRNA	0.622652	-2.38534	0.759563	-3.14042	0.00168707	0.00371808
RNU6-733P	ENSG00000222691	snRNA	1.04898	-2.38577	0.568525	-4.19641	2.71176e-05	8.25502e-05
AC007494.2	ENSG00000260744	lncRNA	4.00967	-2.38634	0.25876	-9.2222	2.91077e-20	9.18722e-19
AC074375.1	ENSG00000226523	processed_pseudogene	0.898298	-2.3873	0.451947	-5.28225	1.27603e-07	5.71939e-07
Y_RNA	ENSG00000207223	misc_RNA	1.22012	-2.38746	0.361393	-6.60626	3.94145e-11	3.0389e-10
AC012555.2	ENSG00000257754	lncRNA	1.06823	-2.3878	0.468614	-5.09545	3.4791e-07	1.44831e-06
SLC9A4	ENSG00000180251	protein_coding	23.4732	-2.38791	0.287021	-8.31964	8.82335e-17	1.6016e-15
RNU1-91P	ENSG00000201616	snRNA	1.45964	-2.38822	0.320609	-7.44903	9.40315e-14	1.07861e-12
TIMM9P2	ENSG00000232608	processed_pseudogene	6.57209	-2.38843	0.220795	-10.8174	2.84776e-27	2.51281e-25
RPL36AP48	ENSG00000213180	processed_pseudogene	2.16425	-2.38865	0.276661	-8.63387	5.93103e-18	1.31096e-16
DAPK1-IT1	ENSG00000236709	lncRNA	3.28366	-2.38877	0.28391	-8.41385	3.96781e-17	7.6026e-16
AC011471.2	ENSG00000267563	lncRNA	1.47477	-2.38922	0.32482	-7.35553	1.90167e-13	2.0769e-12
AP005131.3	ENSG00000267503	lncRNA	3.79642	-2.39001	0.24207	-9.87325	5.43742e-23	2.63413e-21
AC132068.1	ENSG00000279757	TEC	1.66267	-2.39023	0.286438	-8.34468	7.14094e-17	1.31445e-15
RN7SKP217	ENSG00000201510	misc_RNA	0.639788	-2.39107	0.968067	-2.46994	0.0135136	0.0247723
AL669841.1	ENSG00000233021	lncRNA	0.868683	-2.39116	0.549552	-4.35111	1.35448e-05	4.34573e-05
MTCO1P55	ENSG00000241926	processed_pseudogene	0.650156	-2.39383	0.564891	-4.23769	2.2583e-05	6.97233e-05
AC010997.1	ENSG00000223428	transcribed_processed_pseudogene	0.846539	-2.39401	0.435816	-5.49316	3.94802e-08	1.91322e-07
SCARNA1	ENSG00000252947	scaRNA	3.09085	-2.39451	0.357838	-6.6916	2.20739e-11	1.76814e-10
RNA5SP20	ENSG00000251785	rRNA_pseudogene	1.13298	-2.39496	0.721094	-3.32129	0.000896019	0.00207293
AC004217.2	ENSG00000257658	processed_pseudogene	1.00919	-2.39555	0.537282	-4.45864	8.24802e-06	2.73981e-05
RN7SL736P	ENSG00000275803	misc_RNA	3.03366	-2.39607	0.346721	-6.91066	4.82397e-12	4.26135e-11
MIR5706	ENSG00000264536	miRNA	0.710951	-2.39749	0.999089	-2.39967	0.0164097	0.0295619
RNA5SP237	ENSG00000222346	rRNA_pseudogene	0.818347	-2.39949	0.62458	-3.84177	0.000122149	0.000331456
AC092120.2	ENSG00000270832	processed_pseudogene	3.40255	-2.40127	0.285744	-8.40356	4.3314e-17	8.22134e-16
KCNQ5-AS1	ENSG00000229154	lncRNA	1.3883	-2.40148	0.463994	-5.17568	2.27082e-07	9.75918e-07
AC112225.1	ENSG00000250214	processed_pseudogene	0.733716	-2.40221	0.532166	-4.51402	6.36102e-06	2.15173e-05
AC011753.2	ENSG00000230696	lncRNA	1.76004	-2.40416	0.313374	-7.67183	1.69556e-14	2.17808e-13
FTH1P24	ENSG00000249302	processed_pseudogene	3.31315	-2.40564	0.283238	-8.49336	2.00754e-17	4.04528e-16
Y_RNA	ENSG00000200842	misc_RNA	2.46357	-2.40587	0.355433	-6.76883	1.29829e-11	1.0784e-10
AC026894.1	ENSG00000255159	lncRNA	3.45532	-2.40701	0.261251	-9.21339	3.15972e-20	9.92368e-19
RN7SL116P	ENSG00000240474	misc_RNA	2.80571	-2.40753	0.356083	-6.76115	1.36898e-11	1.13215e-10
RPS12P5	ENSG00000226216	processed_pseudogene	1.32357	-2.40813	0.381605	-6.31053	2.78085e-10	1.8878e-09
AC007787.1	ENSG00000267610	lncRNA	1.19249	-2.40877	0.280009	-8.60248	7.80137e-18	1.68664e-16
NDUFA5P2	ENSG00000253454	processed_pseudogene	0.822456	-2.40923	0.448175	-5.37565	7.63051e-08	3.54665e-07
AL035410.1	ENSG00000226984	processed_pseudogene	2.80641	-2.40972	0.326395	-7.38281	1.54982e-13	1.72094e-12
5_8S_rRNA	ENSG00000277739	rRNA	0.654699	-2.40975	1.3764	-1.75077	0.079986	0.121495
AC005702.2	ENSG00000267526	processed_pseudogene	3.03111	-2.40981	0.271842	-8.86476	7.66698e-19	1.95172e-17
MIR505	ENSG00000207633	miRNA	0.691816	-2.40984	0.720548	-3.34446	0.000824443	0.00192163
AC092839.2	ENSG00000234943	lncRNA	4.14006	-2.41006	0.242403	-9.94238	2.72243e-23	1.38052e-21
U4	ENSG00000274197	snRNA	0.840296	-2.41065	0.652467	-3.69466	0.000220179	0.000571051
AP003031.2	ENSG00000200256	misc_RNA	0.679136	-2.41276	0.628593	-3.83835	0.000123863	0.000335777
HMGN2P35	ENSG00000232875	processed_pseudogene	2.44329	-2.41307	0.281395	-8.57537	9.87686e-18	2.09964e-16
OR2D3	ENSG00000178358	protein_coding	0.788986	-2.41308	0.654996	-3.68411	0.000229507	0.000593236
AL160274.1	ENSG00000279083	TEC	3.54054	-2.4151	0.263365	-9.17016	4.72316e-20	1.44264e-18
RN7SL33P	ENSG00000243049	misc_RNA	0.884221	-2.41629	0.447959	-5.394	6.89073e-08	3.22709e-07
TVP23CP2	ENSG00000262470	processed_pseudogene	3.26764	-2.41743	0.279789	-8.64019	5.61204e-18	1.24478e-16
AC002359.1	ENSG00000202469	misc_RNA	0.809834	-2.4178	0.379557	-6.37005	1.88972e-10	1.31744e-09
SNORD116-14	ENSG00000206621	snoRNA	1.35768	-2.41789	0.379676	-6.36831	1.91127e-10	1.331e-09
RPEP3	ENSG00000230833	processed_pseudogene	1.48587	-2.41922	0.312546	-7.74036	9.91369e-15	1.31803e-13
AC018643.1	ENSG00000225144	lncRNA	0.637418	-2.41929	0.875888	-2.7621	0.00574303	0.0113979
AC011944.2	ENSG00000279235	TEC	4.40848	-2.42031	0.25992	-9.31176	1.25729e-20	4.21359e-19
OR2A3P	ENSG00000183122	transcribed_unprocessed_pseudogene	0.871952	-2.4212	0.417302	-5.80204	6.55148e-09	3.58814e-08
AC099494.3	ENSG00000279620	TEC	2.98353	-2.4215	0.301381	-8.0347	9.38054e-16	1.45457e-14
AL133368.2	ENSG00000258693	lncRNA	1.24984	-2.42232	0.374905	-6.46114	1.03914e-10	7.51547e-10
AC008764.10	ENSG00000279977	TEC	2.97986	-2.42284	0.278369	-8.70371	3.21219e-18	7.41321e-17
AL445223.1	ENSG00000269189	lncRNA	3.39786	-2.42392	0.354509	-6.83739	8.06483e-12	6.87877e-11
AC104982.2	ENSG00000263477	lncRNA	3.40684	-2.42393	0.348725	-6.95083	3.63135e-12	3.26381e-11
AC011389.1	ENSG00000248222	lncRNA	2.5575	-2.42441	0.345796	-7.01109	2.36477e-12	2.19004e-11
RNU4-59P	ENSG00000201317	snRNA	0.67198	-2.4247	0.699574	-3.46596	0.000528334	0.00127647
ADAM3B	ENSG00000260089	processed_pseudogene	0.607724	-2.42537	0.721687	-3.3607	0.000777457	0.00182108
MYCBP2-AS2	ENSG00000229521	lncRNA	2.78141	-2.42588	0.275589	-8.80254	1.33754e-18	3.2773e-17
AL158062.1	ENSG00000278496	unprocessed_pseudogene	1.8883	-2.42614	0.307601	-7.88728	3.08844e-15	4.42634e-14
AC073530.1	ENSG00000257083	lncRNA	1.87658	-2.42617	0.4952	-4.89937	9.61442e-07	3.71318e-06
RN7SKP228	ENSG00000222974	misc_RNA	0.799442	-2.42645	0.668346	-3.63053	0.000282837	0.000718801
AC244034.3	ENSG00000279946	TEC	3.20686	-2.42709	0.276408	-8.78083	1.62273e-18	3.92419e-17
AC022898.1	ENSG00000259591	lncRNA	2.34942	-2.42783	0.291896	-8.31744	8.98849e-17	1.62825e-15
AC096531.1	ENSG00000227556	unprocessed_pseudogene	0.673069	-2.42903	0.458596	-5.29667	1.17935e-07	5.31282e-07
AL117342.1	ENSG00000218730	processed_pseudogene	0.693731	-2.42935	0.83582	-2.90654	0.00365446	0.00754579
MTCYBP41	ENSG00000254650	processed_pseudogene	0.79409	-2.42973	0.380255	-6.38972	1.66184e-10	1.16754e-09
RNU7-10P	ENSG00000271841	snRNA	0.774887	-2.43086	0.722542	-3.36431	0.000767347	0.00179911
RPL12P20	ENSG00000239627	processed_pseudogene	3.70802	-2.43341	0.32358	-7.52026	5.46666e-14	6.4675e-13
SNORA62	ENSG00000202374	snoRNA	1.29709	-2.4352	0.330974	-7.35769	1.87125e-13	2.04719e-12
OR10A5	ENSG00000166363	protein_coding	0.70459	-2.43614	0.795709	-3.0616	0.00220161	0.00474577
BNIP3P25	ENSG00000268322	processed_pseudogene	4.06901	-2.4362	0.271467	-8.97421	2.85382e-19	7.72459e-18
HSPE1P11	ENSG00000187762	processed_pseudogene	5.65289	-2.43643	0.21534	-11.3143	1.11456e-29	1.40415e-27
SNORD8	ENSG00000200785	snoRNA	3.27455	-2.43667	0.356307	-6.83868	7.99243e-12	6.82225e-11
AL590632.1	ENSG00000223450	processed_pseudogene	3.08296	-2.43685	0.388636	-6.27026	3.60442e-10	2.39856e-09
MIR4676	ENSG00000266719	miRNA	0.824544	-2.43797	0.536828	-4.54143	5.58738e-06	1.90641e-05
PRDX3P4	ENSG00000239926	processed_pseudogene	3.22608	-2.43828	0.258302	-9.43965	3.74024e-21	1.34903e-19
MIR151A	ENSG00000254324	miRNA	0.860418	-2.43853	0.663184	-3.67701	0.000235983	0.000608668
DNAJB6P7	ENSG00000243508	processed_pseudogene	3.19871	-2.43879	0.313511	-7.77896	7.31247e-15	9.92068e-14
AC140076.1	ENSG00000227309	processed_pseudogene	3.15909	-2.43897	0.274354	-8.88986	6.11841e-19	1.58105e-17
AC012404.2	ENSG00000259575	lncRNA	2.46241	-2.4392	0.320822	-7.60297	2.89413e-14	3.58917e-13
AC007683.2	ENSG00000279482	TEC	1.15651	-2.44135	0.381902	-6.39261	1.63079e-10	1.14754e-09
AC093297.1	ENSG00000248779	lncRNA	0.756128	-2.44243	0.427116	-5.71843	1.0751e-08	5.70069e-08
RNA5SP129	ENSG00000222208	rRNA_pseudogene	1.21491	-2.44318	0.416722	-5.86286	4.54969e-09	2.55569e-08
Y_RNA	ENSG00000206768	misc_RNA	1.40027	-2.44322	0.349345	-6.9937	2.67729e-12	2.45645e-11
RPS17P13	ENSG00000224706	processed_pseudogene	0.876904	-2.44422	0.758757	-3.22134	0.00127591	0.00287373
Y_RNA	ENSG00000222579	misc_RNA	0.991429	-2.4458	0.559293	-4.37301	1.22544e-05	3.95973e-05
AC011853.2	ENSG00000255206	lncRNA	0.671085	-2.44616	0.934173	-2.61853	0.00883096	0.0168417
AP000755.2	ENSG00000255219	lncRNA	1.19397	-2.44639	0.461309	-5.30316	1.13817e-07	5.13615e-07
Z93022.1	ENSG00000235834	lncRNA	2.64109	-2.44784	0.306013	-7.99912	1.25309e-15	1.90847e-14
AC008379.1	ENSG00000241187	processed_pseudogene	2.81108	-2.44806	0.279155	-8.76953	1.79409e-18	4.30349e-17
RNU6-874P	ENSG00000199260	snRNA	0.649762	-2.44876	0.828134	-2.95696	0.00310684	0.00650198
AL807761.4	ENSG00000230782	lncRNA	2.0764	-2.44908	0.385444	-6.35393	2.09883e-10	1.45252e-09
AC002044.3	ENSG00000280092	TEC	2.96403	-2.44919	0.268669	-9.11598	7.79614e-20	2.3114e-18
AL035090.1	ENSG00000225832	processed_pseudogene	1.28012	-2.45012	0.450952	-5.4332	5.53514e-08	2.62934e-07
AL391280.1	ENSG00000239182	snoRNA	0.775834	-2.45092	0.506828	-4.8358	1.32611e-06	4.99911e-06
RNU1-83P	ENSG00000200296	snRNA	0.977766	-2.4511	0.613137	-3.99764	6.39759e-05	0.000182381
CYCSP2	ENSG00000259547	processed_pseudogene	1.09597	-2.45216	0.373612	-6.56338	5.26017e-11	3.97976e-10
AC012317.1	ENSG00000261583	lncRNA	6.63489	-2.45221	0.278507	-8.80484	1.31034e-18	3.21952e-17
OR52H1	ENSG00000181616	protein_coding	0.988635	-2.45234	0.431461	-5.68381	1.31727e-08	6.8887e-08
SNORD38D	ENSG00000207199	snoRNA	1.52464	-2.45301	0.475083	-5.16334	2.42584e-07	1.03792e-06
AL009028.1	ENSG00000270268	processed_pseudogene	0.874296	-2.45313	0.655102	-3.74465	0.000180647	0.000476186
MIR548AQ	ENSG00000265470	miRNA	0.58549	-2.45341	0.852861	-2.87668	0.00401881	0.00822403
AL133370.2	ENSG00000274666	unprocessed_pseudogene	3.27391	-2.4535	0.343014	-7.15278	8.5036e-13	8.40196e-12
AL022400.1	ENSG00000237317	processed_pseudogene	2.01114	-2.45365	0.332916	-7.37018	1.70398e-13	1.87712e-12
AC023271.1	ENSG00000202059	snoRNA	1.61192	-2.45573	0.326735	-7.51596	5.64957e-14	6.67147e-13
AL391314.1	ENSG00000252438	snoRNA	1.24655	-2.45601	0.432572	-5.67768	1.36533e-08	7.12163e-08
RNU6-135P	ENSG00000252578	snRNA	0.830719	-2.45603	0.455769	-5.38875	7.09501e-08	3.31369e-07
RNU6-1282P	ENSG00000252544	snRNA	1.21592	-2.45627	0.487842	-5.03497	4.77926e-07	1.94405e-06
CLYBL-AS1	ENSG00000234303	lncRNA	0.634692	-2.45665	0.56318	-4.36212	1.2881e-05	4.14593e-05
PIMREGP4	ENSG00000248340	processed_pseudogene	1.33874	-2.45748	0.472349	-5.20268	1.96436e-07	8.54451e-07
AC008953.1	ENSG00000242602	processed_pseudogene	4.04347	-2.45791	0.302152	-8.13468	4.13012e-16	6.78017e-15
RN7SKP253	ENSG00000252233	misc_RNA	1.17149	-2.45954	0.51989	-4.73088	2.23553e-06	8.12176e-06
AC068397.1	ENSG00000259528	lncRNA	1.35803	-2.46093	0.337562	-7.29031	3.09251e-13	3.27141e-12
RNU6-414P	ENSG00000200575	snRNA	1.14093	-2.46489	0.410716	-6.00144	1.95577e-09	1.16062e-08
CACNA1C-AS3	ENSG00000256769	lncRNA	0.60096	-2.46775	0.807299	-3.05679	0.00223717	0.0048138
RNU4ATAC11P	ENSG00000251748	snRNA	1.3038	-2.46903	0.501745	-4.92088	8.61577e-07	3.35841e-06
RN7SL482P	ENSG00000241587	misc_RNA	1.08783	-2.46918	0.415647	-5.94057	2.84037e-09	1.64475e-08
HTR1DP1	ENSG00000275811	processed_pseudogene	2.79395	-2.46929	0.304577	-8.10728	5.17656e-16	8.3791e-15
RPL23AP30	ENSG00000226658	processed_pseudogene	2.57305	-2.4695	0.297252	-8.30777	9.75133e-17	1.75856e-15
AC005090.1	ENSG00000231418	lncRNA	3.55279	-2.46965	0.46051	-5.36285	8.19177e-08	3.78616e-07
NPAP1P4	ENSG00000236521	processed_pseudogene	0.864318	-2.46975	0.484822	-5.09414	3.50324e-07	1.45686e-06
RNA5SP363	ENSG00000201942	rRNA_pseudogene	0.812514	-2.46994	0.737282	-3.35005	0.000807957	0.00188587
AC073592.6	ENSG00000279334	TEC	2.19627	-2.47111	0.270565	-9.13313	6.6545e-20	1.99151e-18
RNU6-123P	ENSG00000251972	snRNA	1.3008	-2.47165	0.45149	-5.47443	4.38913e-08	2.115e-07
AL096817.1	ENSG00000279616	TEC	2.8078	-2.47245	0.2819	-8.77066	1.77625e-18	4.26299e-17
AL022323.1	ENSG00000279006	lncRNA	5.29647	-2.47317	0.266531	-9.27911	1.70903e-20	5.60914e-19
AC010261.1	ENSG00000250882	lncRNA	2.35665	-2.47336	0.257269	-9.61392	6.98362e-22	2.82085e-20
RBPMSLP	ENSG00000234159	processed_pseudogene	2.08461	-2.474	0.347422	-7.12103	1.07125e-12	1.04223e-11
AC023206.1	ENSG00000271332	processed_pseudogene	2.56785	-2.47475	0.313602	-7.89139	2.98844e-15	4.28993e-14
AL137077.1	ENSG00000235018	processed_pseudogene	2.86744	-2.47566	0.265952	-9.30865	1.29469e-20	4.3324e-19
AC009145.3	ENSG00000260694	lncRNA	0.774876	-2.47587	1.0537	-2.34968	0.0187895	0.033387
AC011853.1	ENSG00000254051	processed_pseudogene	0.554572	-2.47641	1.07672	-2.29994	0.0214514	0.0376252
AC084783.1	ENSG00000261072	processed_pseudogene	3.29278	-2.47649	0.406392	-6.09385	1.10229e-09	6.80471e-09
AC005520.3	ENSG00000270140	lncRNA	3.34677	-2.477	0.26685	-9.28236	1.65759e-20	5.45239e-19
MIR4774	ENSG00000265694	miRNA	0.699695	-2.47993	0.867232	-2.85959	0.00424183	0.00864183
TCF7L1-IT1	ENSG00000231134	lncRNA	3.08788	-2.48084	0.259019	-9.5778	9.91293e-22	3.89441e-20
NPM1P11	ENSG00000226827	processed_pseudogene	1.27278	-2.48198	0.406245	-6.10957	9.99017e-10	6.20593e-09
RN7SL653P	ENSG00000239794	misc_RNA	0.752987	-2.48295	0.717921	-3.45852	0.000543147	0.00130999
Y_RNA	ENSG00000201047	misc_RNA	0.941776	-2.48338	0.556609	-4.46163	8.13389e-06	2.70655e-05
CLDN18	ENSG00000066405	protein_coding	4440.51	-2.48358	0.218579	-11.3624	6.43717e-30	8.49477e-28
AC009686.1	ENSG00000254205	lncRNA	2.03952	-2.48454	0.38258	-6.49417	8.34951e-11	6.13548e-10
AC138474.1	ENSG00000267417	lncRNA	1.25911	-2.48561	0.277892	-8.94452	3.73565e-19	9.93611e-18
RPL26P15	ENSG00000233829	processed_pseudogene	0.881486	-2.48563	0.535999	-4.63737	3.52869e-06	1.24408e-05
AC022493.2	ENSG00000248967	processed_pseudogene	2.15553	-2.48577	0.347025	-7.16308	7.8885e-13	7.84651e-12
AP002075.1	ENSG00000251309	lncRNA	1.76884	-2.48594	0.338818	-7.33711	2.1825e-13	2.3663e-12
MTATP6P15	ENSG00000254931	processed_pseudogene	0.758974	-2.48671	0.594737	-4.18118	2.89997e-05	8.78764e-05
NDUFB4P1	ENSG00000242510	processed_pseudogene	2.26615	-2.48728	0.442827	-5.61682	1.94498e-08	9.89898e-08
AC079594.1	ENSG00000243687	processed_pseudogene	2.03559	-2.48767	0.356555	-6.97698	3.01603e-12	2.74348e-11
RN7SL792P	ENSG00000239888	misc_RNA	0.953446	-2.48781	0.390144	-6.37665	1.81001e-10	1.26505e-09
AL807757.1	ENSG00000230815	lncRNA	3.54134	-2.48784	0.307772	-8.08338	6.29937e-16	1.00808e-14
RASA2-IT1	ENSG00000250170	lncRNA	2.44417	-2.48867	0.35708	-6.96949	3.18093e-12	2.88287e-11
AC022022.2	ENSG00000270421	processed_pseudogene	2.33107	-2.48979	0.490177	-5.07936	3.78704e-07	1.5658e-06
RNU6-83P	ENSG00000207298	snRNA	0.735896	-2.49026	0.773262	-3.22046	0.00127985	0.00288176
AC022469.2	ENSG00000258662	lncRNA	0.671357	-2.49067	0.802836	-3.10234	0.00191997	0.00418452
TCF4-AS1	ENSG00000267028	lncRNA	1.69317	-2.49102	0.49719	-5.0102	5.43729e-07	2.19207e-06
MTCO2P11	ENSG00000235917	unprocessed_pseudogene	2.39571	-2.49111	0.308168	-8.08363	6.28656e-16	1.00639e-14
AC108935.1	ENSG00000250357	lncRNA	0.865647	-2.49243	0.654985	-3.80533	0.000141618	0.000380031
BCAS2P3	ENSG00000226670	processed_pseudogene	0.625627	-2.49507	0.928226	-2.688	0.00718808	0.0139666
RPS26P42	ENSG00000232437	processed_pseudogene	1.20036	-2.49698	0.552362	-4.52055	6.16796e-06	2.08992e-05
PLCL2-AS1	ENSG00000226441	lncRNA	0.975175	-2.49764	0.557299	-4.4817	7.40522e-06	2.47892e-05
AC114763.2	ENSG00000230569	lncRNA	2.21123	-2.49849	0.391727	-6.37814	1.79246e-10	1.25357e-09
NSA2P6	ENSG00000250980	processed_pseudogene	3.61595	-2.49855	0.275122	-9.08162	1.06968e-19	3.09706e-18
AC073520.1	ENSG00000222432	misc_RNA	0.809297	-2.49858	0.615286	-4.06084	4.88975e-05	0.00014225
PLS1-AS1	ENSG00000239641	lncRNA	1.19829	-2.49893	0.464899	-5.37521	7.64938e-08	3.55394e-07
AC092868.2	ENSG00000259735	lncRNA	3.32524	-2.49898	0.272912	-9.15671	5.35015e-20	1.61968e-18
LINC00678	ENSG00000254934	lncRNA	0.997538	-2.49902	0.475895	-5.25121	1.51106e-07	6.70056e-07
AP001011.1	ENSG00000266049	lncRNA	4.50965	-2.4992	0.314293	-7.95182	1.83798e-15	2.72553e-14
AC022022.1	ENSG00000224412	processed_pseudogene	1.27247	-2.49931	0.449716	-5.55754	2.73601e-08	1.36133e-07
SMYD3-IT1	ENSG00000230184	lncRNA	3.00975	-2.49959	0.301094	-8.30169	1.0264e-16	1.84577e-15
RNU2-36P	ENSG00000222293	snRNA	0.907791	-2.50013	1.15028	-2.17349	0.0297431	0.0504515
FCF1P5	ENSG00000220392	processed_pseudogene	3.3902	-2.50074	0.282223	-8.86087	7.93939e-19	2.0176e-17
RN7SL464P	ENSG00000243872	misc_RNA	0.804754	-2.50121	0.646181	-3.87076	0.000108495	0.000297104
AC008915.1	ENSG00000212593	snoRNA	0.851308	-2.50184	0.526187	-4.75466	1.98779e-06	7.2776e-06
AC103876.1	ENSG00000259986	lncRNA	2.55398	-2.5029	0.278584	-8.98436	2.60233e-19	7.07834e-18
AP000763.1	ENSG00000255786	processed_pseudogene	0.70088	-2.5046	0.638629	-3.92185	8.78734e-05	0.000244473
RNU6-795P	ENSG00000252132	snRNA	1.89383	-2.50476	0.3233	-7.74748	9.37354e-15	1.25033e-13
AL133481.1	ENSG00000235426	lncRNA	1.70699	-2.50493	0.278383	-8.99813	2.29585e-19	6.32989e-18
AL133492.1	ENSG00000275139	lncRNA	2.80857	-2.50629	0.292585	-8.56601	1.07129e-17	2.26438e-16
DDX3P2	ENSG00000230986	processed_pseudogene	1.03881	-2.50634	0.426729	-5.87338	4.27006e-09	2.40865e-08
SNRPEP9	ENSG00000214124	processed_pseudogene	0.929974	-2.50656	0.469273	-5.34138	9.2244e-08	4.23264e-07
AC009480.1	ENSG00000223911	lncRNA	1.23512	-2.5068	0.481629	-5.20485	1.94152e-07	8.45176e-07
RNU6-645P	ENSG00000201519	snRNA	0.827888	-2.50709	0.558772	-4.48679	7.23033e-06	2.42494e-05
RNVU1-7	ENSG00000206585	snRNA	7.45027	-2.50721	0.285617	-8.77824	1.66052e-18	4.00906e-17
AC007448.3	ENSG00000264421	lncRNA	2.61742	-2.50736	0.370195	-6.77308	1.26068e-11	1.04873e-10
AC092652.1	ENSG00000257277	lncRNA	2.96684	-2.50762	0.255803	-9.80291	1.09387e-22	5.02549e-21
AC096775.1	ENSG00000237551	processed_pseudogene	1.04968	-2.50773	0.398278	-6.29644	3.04567e-10	2.05566e-09
SYF2P2	ENSG00000233148	processed_pseudogene	1.49134	-2.50794	0.328435	-7.63602	2.24033e-14	2.82563e-13
TBC1D22A-AS1	ENSG00000280080	lncRNA	3.83855	-2.50829	0.254603	-9.85175	6.7361e-23	3.20736e-21
RN7SL177P	ENSG00000242976	misc_RNA	0.699585	-2.50841	0.780533	-3.21372	0.00131029	0.00294581
AC079866.2	ENSG00000256571	lncRNA	2.27752	-2.50883	0.364658	-6.87995	5.98756e-12	5.19974e-11
AC110994.2	ENSG00000232830	processed_pseudogene	1.74945	-2.50995	0.41898	-5.99062	2.09041e-09	1.23443e-08
AL033519.1	ENSG00000212579	snoRNA	1.9347	-2.51	0.288261	-8.70739	3.10959e-18	7.1951e-17
AC046158.1	ENSG00000260733	lncRNA	3.46671	-2.5104	0.293518	-8.55279	1.20153e-17	2.51575e-16
ATP11A-AS1	ENSG00000232684	lncRNA	10.8216	-2.51228	0.240593	-10.442	1.59339e-25	1.10204e-23
CDC42EP3P1	ENSG00000268992	processed_pseudogene	2.53797	-2.51265	0.342783	-7.33014	2.29911e-13	2.48714e-12
AC018878.1	ENSG00000233339	lncRNA	1.30116	-2.51279	0.402616	-6.24115	4.3437e-10	2.85337e-09
AL109767.1	ENSG00000235785	lncRNA	1.34401	-2.51283	0.362001	-6.94149	3.87998e-12	3.46975e-11
AL590103.1	ENSG00000231978	processed_pseudogene	1.40549	-2.51284	0.387798	-6.47975	9.18736e-11	6.70903e-10
MTND5P33	ENSG00000261904	unprocessed_pseudogene	0.668886	-2.51304	0.626711	-4.00988	6.075e-05	0.000173844
RNU6-768P	ENSG00000207414	snRNA	0.8933	-2.51326	0.519792	-4.83513	1.33059e-06	5.01434e-06
RN7SL577P	ENSG00000265942	misc_RNA	1.62105	-2.51334	0.380887	-6.59865	4.14919e-11	3.18912e-10
RPL7P25	ENSG00000216636	processed_pseudogene	3.39327	-2.5145	0.269373	-9.33463	1.01342e-20	3.44299e-19
RNA5-8SP5	ENSG00000202174	rRNA_pseudogene	0.561435	-2.5146	1.53375	-1.63951	0.101107	0.148986
AC078860.1	ENSG00000212461	snoRNA	1.61724	-2.51598	0.561853	-4.47802	7.53403e-06	2.51939e-05
Y_RNA	ENSG00000202417	misc_RNA	1.7559	-2.51599	0.34407	-7.31243	2.62364e-13	2.80882e-12
AL353692.1	ENSG00000199630	misc_RNA	1.64356	-2.51693	0.31809	-7.91262	2.52022e-15	3.66992e-14
AC104365.2	ENSG00000267476	lncRNA	3.55106	-2.51751	0.256706	-9.80698	1.05065e-22	4.84695e-21
SAMM50P1	ENSG00000224488	processed_pseudogene	0.996918	-2.51781	0.51086	-4.92858	8.2831e-07	3.23781e-06
UBE2V2P4	ENSG00000231849	processed_pseudogene	2.22615	-2.51817	0.3336	-7.54848	4.40355e-14	5.30286e-13
AP000676.4	ENSG00000280307	TEC	0.582189	-2.52	1.02682	-2.45417	0.014121	0.0257795
MIR620	ENSG00000207967	miRNA	0.759946	-2.52017	0.862015	-2.92358	0.00346036	0.00717532
RN7SKP36	ENSG00000200867	misc_RNA	0.664131	-2.52133	1.11602	-2.25922	0.0238697	0.0414087
AC016559.1	ENSG00000206592	snoRNA	1.2358	-2.52171	0.441144	-5.71629	1.08874e-08	5.76891e-08
AL136146.2	ENSG00000255256	lncRNA	0.656619	-2.52173	0.739286	-3.41103	0.000647168	0.0015404
RNVU1-29	ENSG00000273768	snRNA	2.32747	-2.52192	0.365152	-6.90651	4.96716e-12	4.37871e-11
LIPT1P1	ENSG00000229975	processed_pseudogene	0.581252	-2.52211	0.867038	-2.90888	0.00362722	0.00749476
RN7SL398P	ENSG00000244356	misc_RNA	2.49349	-2.5222	0.503708	-5.00726	5.52114e-07	2.22185e-06
DDI1	ENSG00000170967	protein_coding	1.45333	-2.52222	0.507677	-4.96816	6.75923e-07	2.68007e-06
MTND2P11	ENSG00000237124	unprocessed_pseudogene	0.805019	-2.52238	0.544061	-4.63621	3.54852e-06	1.25043e-05
RNA5SP44	ENSG00000222378	rRNA_pseudogene	1.78797	-2.52311	0.329567	-7.65582	1.9208e-14	2.44552e-13
AP000751.1	ENSG00000206847	misc_RNA	1.70145	-2.52496	0.375576	-6.7229	1.78143e-11	1.44753e-10
AC010265.1	ENSG00000248350	processed_pseudogene	0.891286	-2.52559	0.497954	-5.07193	3.93808e-07	1.62327e-06
Y_RNA	ENSG00000238585	misc_RNA	0.769376	-2.52563	0.847502	-2.98009	0.00288167	0.0060696
AC087749.2	ENSG00000264829	lncRNA	3.02836	-2.52834	0.277811	-9.10091	8.9576e-20	2.62253e-18
AL731575.1	ENSG00000224500	lncRNA	0.780615	-2.52929	0.779141	-3.24626	0.00116932	0.00265208
EIF4BP5	ENSG00000261336	processed_pseudogene	4.08539	-2.5294	0.266837	-9.47921	2.56227e-21	9.57557e-20
AC107029.2	ENSG00000244464	lncRNA	1.14218	-2.5295	0.438859	-5.7638	8.22398e-09	4.43425e-08
MYOCD-AS1	ENSG00000227274	lncRNA	0.675233	-2.53078	0.691615	-3.65923	0.000252975	0.000648582
AC096713.1	ENSG00000249170	processed_pseudogene	0.94957	-2.5315	0.525823	-4.81436	1.47675e-06	5.51466e-06
TSPAN9-IT1	ENSG00000256197	lncRNA	0.975913	-2.53192	0.477121	-5.30666	1.11649e-07	5.04909e-07
SNORA70	ENSG00000252657	snoRNA	1.12399	-2.53287	0.398247	-6.36006	2.01669e-10	1.3996e-09
RNU6-1275P	ENSG00000212389	snRNA	0.788112	-2.53294	0.808344	-3.13349	0.00172739	0.00380016
AC108676.2	ENSG00000271483	processed_pseudogene	0.963469	-2.53431	0.563559	-4.49697	6.89271e-06	2.31888e-05
AC068473.2	ENSG00000266901	lncRNA	1.11999	-2.53436	0.38977	-6.5022	7.91548e-11	5.83873e-10
RN7SL629P	ENSG00000241243	misc_RNA	1.38139	-2.53502	0.453764	-5.58666	2.31483e-08	1.16441e-07
AL606748.2	ENSG00000252050	snoRNA	1.32138	-2.53608	0.427541	-5.9318	2.99632e-09	1.7309e-08
Z99289.3	ENSG00000271208	lncRNA	1.50591	-2.53655	0.435956	-5.81837	5.94233e-09	3.27591e-08
AC079835.1	ENSG00000201297	misc_RNA	0.605446	-2.53816	1.00741	-2.5195	0.011752	0.0218428
AC018946.1	ENSG00000259177	lncRNA	2.91218	-2.53833	0.278741	-9.10639	8.51675e-20	2.50998e-18
RPL7L1P2	ENSG00000231490	processed_pseudogene	1.04469	-2.53836	0.394158	-6.43995	1.19516e-10	8.5769e-10
OR1L4	ENSG00000136939	protein_coding	0.719305	-2.53844	0.647472	-3.92053	8.83534e-05	0.000245763
RNU6-606P	ENSG00000207452	snRNA	1.6315	-2.53911	0.449521	-5.64847	1.61884e-08	8.33927e-08
AP001136.1	ENSG00000226771	lncRNA	0.71968	-2.53941	0.826203	-3.0736	0.00211495	0.00457227
RN7SKP193	ENSG00000201358	misc_RNA	0.840437	-2.54083	0.718317	-3.5372	0.000404397	0.00099852
SNORD38C	ENSG00000207109	snoRNA	1.0234	-2.54214	0.427343	-5.94872	2.70255e-09	1.56924e-08
RN7SKP94	ENSG00000222976	misc_RNA	0.79653	-2.54263	0.830776	-3.06055	0.00220929	0.00476049
RN7SL330P	ENSG00000244391	misc_RNA	1.14118	-2.54299	0.54494	-4.66655	3.06295e-06	1.08964e-05
Y_RNA	ENSG00000222506	misc_RNA	1.02421	-2.54325	0.706552	-3.59952	0.000318802	0.000802318
AC012301.1	ENSG00000267146	lncRNA	0.685981	-2.54425	0.954154	-2.6665	0.00766461	0.0148129
AL121933.1	ENSG00000201807	snoRNA	0.6245	-2.54434	0.641021	-3.9692	7.21137e-05	0.000203389
MIR4714	ENSG00000264480	miRNA	0.778543	-2.54443	0.576089	-4.41673	1.00204e-05	3.28536e-05
AC015804.1	ENSG00000279600	TEC	1.64811	-2.54526	0.318061	-8.00242	1.21996e-15	1.8612e-14
RN7SL329P	ENSG00000242170	misc_RNA	3.91095	-2.54557	0.294632	-8.63985	5.62876e-18	1.24787e-16
RN7SL126P	ENSG00000276281	misc_RNA	1.10956	-2.54585	0.431674	-5.89762	3.68787e-09	2.10293e-08
AC068389.3	ENSG00000255321	lncRNA	2.9457	-2.54599	0.34177	-7.44943	9.37431e-14	1.07558e-12
RN7SKP163	ENSG00000200091	misc_RNA	2.6672	-2.54707	0.298263	-8.53967	1.34601e-17	2.7998e-16
TAF13P2	ENSG00000225658	processed_pseudogene	1.00755	-2.54717	0.42417	-6.00506	1.91262e-09	1.13714e-08
BRWD1P3	ENSG00000232841	processed_pseudogene	2.03246	-2.54727	0.326265	-7.80738	5.83871e-15	8.0261e-14
MIR1294	ENSG00000221430	miRNA	0.733419	-2.54776	0.770763	-3.30551	0.000948035	0.00218281
MIR548V	ENSG00000265520	miRNA	3.15759	-2.54835	0.274993	-9.26698	1.91492e-20	6.24343e-19
AC025300.1	ENSG00000254983	lncRNA	0.846712	-2.55007	0.711729	-3.58293	0.000339764	0.000851506
AC026474.1	ENSG00000265113	lncRNA	1.56049	-2.55165	0.348318	-7.32563	2.37776e-13	2.56411e-12
MIR548C	ENSG00000207546	miRNA	1.08562	-2.55175	0.410862	-6.21073	5.27374e-10	3.41587e-09
AC019130.1	ENSG00000227033	lncRNA	0.922796	-2.55176	0.548507	-4.65218	3.28441e-06	1.16367e-05
AC069272.1	ENSG00000250354	lncRNA	1.24135	-2.55228	0.370345	-6.89163	5.51564e-12	4.82003e-11
RNU6-1025P	ENSG00000222561	snRNA	1.40926	-2.55283	0.383884	-6.65002	2.93062e-11	2.30796e-10
AC079336.3	ENSG00000265337	lncRNA	2.37422	-2.55313	0.297989	-8.56787	1.05416e-17	2.23135e-16
AC069366.2	ENSG00000265801	lncRNA	2.04484	-2.55318	0.331215	-7.70853	1.27272e-14	1.66423e-13
HMGB1P7	ENSG00000231148	processed_pseudogene	1.96072	-2.55361	0.412125	-6.1962	5.78424e-10	3.72214e-09
SNORA1B	ENSG00000199405	snoRNA	1.51427	-2.55427	0.420197	-6.07876	1.21117e-09	7.44586e-09
Y_RNA	ENSG00000207370	misc_RNA	3.80407	-2.55467	0.283933	-8.99747	2.3098e-19	6.36441e-18
AC090960.1	ENSG00000231780	processed_pseudogene	0.651122	-2.55563	0.816394	-3.13039	0.00174575	0.00383582
Y_RNA	ENSG00000206738	misc_RNA	0.884453	-2.55599	0.55881	-4.57399	4.78521e-06	1.64904e-05
AC118465.1	ENSG00000248885	processed_pseudogene	3.3236	-2.55637	0.258265	-9.89821	4.23779e-23	2.08246e-21
AC078962.3	ENSG00000256314	lncRNA	2.54039	-2.55657	0.412709	-6.19461	5.84308e-10	3.75837e-09
FABP7P1	ENSG00000226766	processed_pseudogene	1.01059	-2.55695	0.422088	-6.05785	1.37949e-09	8.38901e-09
SSXP10	ENSG00000217330	processed_pseudogene	4.19333	-2.55796	0.323727	-7.90161	2.75325e-15	3.97282e-14
AL627308.2	ENSG00000236636	processed_pseudogene	1.74371	-2.55894	0.417099	-6.1351	8.51043e-10	5.35099e-09
AL139193.1	ENSG00000258437	lncRNA	1.01386	-2.55919	0.457439	-5.5946	2.21125e-08	1.11584e-07
Metazoa_SRP	ENSG00000276359	misc_RNA	0.901173	-2.55988	0.705931	-3.62625	0.000287568	0.000729944
AC091805.1	ENSG00000240328	processed_pseudogene	2.08427	-2.56008	0.32646	-7.84196	4.43569e-15	6.19742e-14
AP000857.2	ENSG00000255555	lncRNA	1.10533	-2.56033	0.660884	-3.87409	0.000107022	0.000293362
AC092127.2	ENSG00000270124	lncRNA	4.74852	-2.56061	0.228352	-11.2134	3.50305e-29	3.98434e-27
HIGD1AP17	ENSG00000258886	processed_pseudogene	1.96164	-2.56376	0.386081	-6.64048	3.12656e-11	2.45056e-10
ELOCP33	ENSG00000271278	processed_pseudogene	3.12244	-2.5643	0.313906	-8.169	3.10947e-16	5.21631e-15
AP001102.1	ENSG00000213287	processed_pseudogene	1.15069	-2.56458	0.479775	-5.34538	9.02272e-08	4.14738e-07
AL512504.1	ENSG00000225715	processed_pseudogene	3.47391	-2.56466	0.27284	-9.39989	5.46227e-21	1.91878e-19
AL590422.1	ENSG00000227554	lncRNA	0.653944	-2.56534	0.81302	-3.15533	0.00160319	0.00354729
LSM3P4	ENSG00000250835	processed_pseudogene	0.934829	-2.566	0.73104	-3.51006	0.000448001	0.00109638
AC093225.1	ENSG00000250860	processed_pseudogene	1.07272	-2.5662	0.430472	-5.96135	2.50158e-09	1.46113e-08
Y_RNA	ENSG00000201012	misc_RNA	0.817896	-2.56835	0.796779	-3.22341	0.00126673	0.00285481
AC100850.1	ENSG00000248423	processed_pseudogene	1.02427	-2.56837	0.46208	-5.55828	2.7244e-08	1.35571e-07
AC009228.2	ENSG00000251805	scaRNA	1.12409	-2.56858	0.585023	-4.39056	1.13057e-05	3.67507e-05
AL360091.2	ENSG00000230063	lncRNA	2.6691	-2.56944	0.345714	-7.43226	1.06761e-13	1.21305e-12
BNIP3P8	ENSG00000269431	processed_pseudogene	1.76626	-2.57091	0.37828	-6.79632	1.07324e-11	9.00548e-11
RN7SL65P	ENSG00000243770	misc_RNA	1.02402	-2.57141	0.710831	-3.61747	0.000297497	0.00075339
Y_RNA	ENSG00000206734	misc_RNA	0.971626	-2.57161	0.492102	-5.22576	1.73438e-07	7.61414e-07
AC093720.1	ENSG00000250376	unprocessed_pseudogene	2.52541	-2.57286	0.405633	-6.34282	2.25592e-10	1.55254e-09
RNU1-27P	ENSG00000206596	snRNA	1.12655	-2.57314	0.495585	-5.19214	2.0789e-07	9.00396e-07
AC004217.1	ENSG00000257494	lncRNA	1.18933	-2.57316	0.507835	-5.06692	4.04303e-07	1.66283e-06
E2F3-IT1	ENSG00000224707	lncRNA	2.10127	-2.57445	0.366649	-7.02156	2.194e-12	2.04125e-11
Y_RNA	ENSG00000201114	misc_RNA	0.963127	-2.57458	0.756598	-3.40285	0.000666879	0.00158285
RNU6-504P	ENSG00000252377	snRNA	0.958905	-2.57475	0.46667	-5.51729	3.44272e-08	1.68729e-07
MIR604	ENSG00000207612	miRNA	1.41087	-2.5748	0.371465	-6.93149	4.16435e-12	3.71061e-11
AP000462.2	ENSG00000256315	lncRNA	3.59235	-2.57498	0.706036	-3.6471	0.000265222	0.000677403
RNU6-672P	ENSG00000206638	snRNA	0.826755	-2.57542	0.556104	-4.63118	3.63587e-06	1.27872e-05
ADAD1P2	ENSG00000267511	processed_pseudogene	0.672214	-2.57613	0.818525	-3.14728	0.00164795	0.0036389
AL139294.1	ENSG00000229294	lncRNA	0.974279	-2.57616	0.53638	-4.80287	1.56407e-06	5.81681e-06
AC006435.5	ENSG00000280280	TEC	1.007	-2.57665	0.479692	-5.37147	7.80968e-08	3.62123e-07
AC118555.1	ENSG00000235096	lncRNA	3.33539	-2.57709	0.286338	-9.00018	2.25342e-19	6.22062e-18
FANK1-AS1	ENSG00000233409	lncRNA	0.784708	-2.58072	0.608813	-4.23894	2.24582e-05	6.93681e-05
LPP-AS1	ENSG00000224563	lncRNA	2.05796	-2.58082	0.473852	-5.44648	5.13769e-08	2.45233e-07
SNORA14A	ENSG00000201643	snoRNA	5.67358	-2.58116	0.278292	-9.27503	1.77565e-20	5.81922e-19
AC106873.2	ENSG00000273571	misc_RNA	0.967196	-2.58137	0.575217	-4.48764	7.20157e-06	2.41602e-05
MIR4480	ENSG00000263584	miRNA	1.16765	-2.5817	0.439522	-5.87389	4.25699e-09	2.40219e-08
RPS20P20	ENSG00000241942	processed_pseudogene	0.890586	-2.58173	0.858893	-3.00588	0.00264815	0.00561819
AC026124.1	ENSG00000250280	lncRNA	3.27953	-2.58234	0.306703	-8.41967	3.77541e-17	7.26212e-16
Y_RNA	ENSG00000206699	misc_RNA	0.80065	-2.58295	0.869136	-2.97186	0.00296004	0.00621965
NUP35P1	ENSG00000223928	processed_pseudogene	0.880065	-2.58387	0.491878	-5.25307	1.49586e-07	6.63713e-07
RNU4-24P	ENSG00000201435	snRNA	2.04253	-2.58424	0.394037	-6.55838	5.43959e-11	4.10922e-10
AGBL4-IT1	ENSG00000225623	lncRNA	0.955961	-2.58427	0.43891	-5.88793	3.91069e-09	2.2203e-08
AC091059.2	ENSG00000278863	TEC	3.39192	-2.58441	0.306187	-8.44064	3.15594e-17	6.16385e-16
LARGE-AS1	ENSG00000224973	lncRNA	3.6124	-2.58448	0.263804	-9.797	1.15983e-22	5.31203e-21
MTND4P34	ENSG00000262322	unprocessed_pseudogene	0.779911	-2.58562	0.563502	-4.58849	4.46466e-06	1.54565e-05
AC018889.1	ENSG00000271146	processed_pseudogene	2.8345	-2.58612	0.307728	-8.40392	4.31822e-17	8.20333e-16
MIR2355	ENSG00000253008	miRNA	1.69669	-2.5864	0.386954	-6.684	2.32503e-11	1.85635e-10
AC096741.1	ENSG00000251171	lncRNA	2.25432	-2.58716	0.419792	-6.16296	7.13964e-10	4.54045e-09
UHRF2P1	ENSG00000223650	processed_pseudogene	3.92265	-2.58787	0.263968	-9.80374	1.08493e-22	4.99472e-21
AC104164.2	ENSG00000240097	processed_pseudogene	1.42803	-2.59003	0.416092	-6.22464	4.8266e-10	3.14596e-09
AC016734.1	ENSG00000279485	TEC	1.09577	-2.59018	0.436763	-5.9304	3.022e-09	1.7447e-08
AC016735.1	ENSG00000224739	lncRNA	3.30846	-2.59065	0.270335	-9.58311	9.41615e-22	3.71896e-20
AC008395.1	ENSG00000268051	lncRNA	2.56365	-2.59088	0.294776	-8.78931	1.50475e-18	3.65479e-17
AF107885.1	ENSG00000242488	transcribed_processed_pseudogene	1.88848	-2.59139	0.307626	-8.42382	3.64403e-17	7.02155e-16
ITPK1-AS1	ENSG00000258730	lncRNA	4.92134	-2.59143	0.250226	-10.3564	3.91532e-25	2.58725e-23
COL18A1-AS2	ENSG00000224574	lncRNA	1.933	-2.59196	0.356099	-7.27876	3.36909e-13	3.5488e-12
SNORA63C	ENSG00000201448	snoRNA	4.62287	-2.59203	0.23767	-10.906	1.07884e-27	1.00583e-25
RPL36AP33	ENSG00000235619	processed_pseudogene	2.16098	-2.59299	0.345514	-7.50474	6.15497e-14	7.23372e-13
MIR569	ENSG00000207963	miRNA	1.0679	-2.59342	0.465212	-5.5747	2.47954e-08	1.24164e-07
AC021822.1	ENSG00000207091	misc_RNA	0.835048	-2.59476	0.637577	-4.06973	4.70684e-05	0.000137378
AC024475.1	ENSG00000254653	lncRNA	2.77011	-2.59547	0.322473	-8.04864	8.37164e-16	1.31231e-14
MTATP6P11	ENSG00000228097	unprocessed_pseudogene	1.72364	-2.59585	0.352149	-7.37146	1.68772e-13	1.86059e-12
RPL22P23	ENSG00000232379	processed_pseudogene	1.25663	-2.59742	0.465555	-5.57919	2.41648e-08	1.21225e-07
MIR548T	ENSG00000221296	miRNA	0.879533	-2.59808	0.595313	-4.36423	1.27569e-05	4.10838e-05
MIR3978	ENSG00000265584	miRNA	0.620928	-2.5981	0.942131	-2.75769	0.0058212	0.0115402
AC110491.2	ENSG00000279658	lncRNA	1.26111	-2.59822	0.375113	-6.92649	4.31408e-12	3.83635e-11
AC100800.1	ENSG00000187229	lncRNA	4.16251	-2.59852	0.34524	-7.52671	5.20362e-14	6.18097e-13
AL391863.1	ENSG00000229502	lncRNA	3.77488	-2.59855	0.35901	-7.23812	4.54961e-13	4.70542e-12
SNRPCP4	ENSG00000264186	processed_pseudogene	2.79185	-2.59856	0.307476	-8.45127	2.88154e-17	5.65276e-16
RNU6-260P	ENSG00000206819	snRNA	1.17305	-2.59912	0.61108	-4.25332	2.10623e-05	6.53379e-05
AC087441.1	ENSG00000206976	snoRNA	1.28601	-2.59932	0.393832	-6.60007	4.10962e-11	3.16035e-10
MIR3139	ENSG00000265623	miRNA	1.04837	-2.60006	0.547235	-4.75127	2.02141e-06	7.39158e-06
TAS2R63P	ENSG00000256019	unprocessed_pseudogene	3.17688	-2.60023	0.347714	-7.47807	7.54203e-14	8.75741e-13
AC007431.1	ENSG00000263499	lncRNA	4.60942	-2.6011	0.266185	-9.77175	1.48859e-22	6.70727e-21
SNORA50A	ENSG00000281910	snoRNA	1.29706	-2.60176	0.402183	-6.4691	9.85888e-11	7.1571e-10
AP000893.2	ENSG00000254698	lncRNA	0.719383	-2.60248	0.639742	-4.06801	4.74158e-05	0.000138274
PRKCE-AS1	ENSG00000228481	lncRNA	3.96468	-2.60252	0.302066	-8.61573	6.94949e-18	1.51499e-16
MIR5009	ENSG00000264796	miRNA	1.03079	-2.60378	0.391681	-6.64771	2.97696e-11	2.34073e-10
AC104350.1	ENSG00000253523	lncRNA	0.874427	-2.60431	0.599452	-4.34448	1.39608e-05	4.46569e-05
RN7SL786P	ENSG00000263993	misc_RNA	0.885617	-2.60441	0.728384	-3.5756	0.00034943	0.000872966
AL513475.2	ENSG00000220739	processed_pseudogene	2.30905	-2.60563	0.442379	-5.89004	3.86092e-09	2.19456e-08
AL355994.4	ENSG00000234607	processed_pseudogene	1.75492	-2.60578	0.31844	-8.18296	2.76959e-16	4.69395e-15
RN7SL418P	ENSG00000241665	misc_RNA	0.899559	-2.60584	0.890521	-2.9262	0.00343131	0.00712107
AL023581.1	ENSG00000225752	lncRNA	1.0124	-2.60757	0.410493	-6.35229	2.12134e-10	1.46696e-09
AC087632.1	ENSG00000252774	snoRNA	0.864804	-2.60867	0.438785	-5.94521	2.76109e-09	1.60148e-08
AC016813.1	ENSG00000207258	misc_RNA	2.79061	-2.60881	0.295508	-8.82822	1.06357e-18	2.65577e-17
RNU7-181P	ENSG00000253043	snRNA	2.1992	-2.60888	0.340248	-7.66759	1.75257e-14	2.24483e-13
NIP7P3	ENSG00000218428	processed_pseudogene	2.70523	-2.60979	0.346889	-7.5234	5.33689e-14	6.32575e-13
AL359693.1	ENSG00000277797	lncRNA	1.87913	-2.6107	0.375918	-6.94487	3.78801e-12	3.39295e-11
AL356266.1	ENSG00000279702	TEC	0.602131	-2.61125	1.41513	-1.84524	0.0650023	0.101136
AC105760.1	ENSG00000124835	lncRNA	2.58795	-2.61133	0.313729	-8.32352	8.5388e-17	1.5563e-15
AL590084.3	ENSG00000262400	processed_pseudogene	1.06495	-2.61147	0.610891	-4.27485	1.91265e-05	5.97452e-05
AL356575.1	ENSG00000270632	processed_pseudogene	0.779126	-2.61152	0.621518	-4.20184	2.64752e-05	8.07436e-05
RNU4-1	ENSG00000200795	snRNA	39.0945	-2.61236	0.322804	-8.09272	5.8346e-16	9.37076e-15
AC104058.1	ENSG00000226410	processed_pseudogene	2.03454	-2.61313	0.313565	-8.33361	7.84151e-17	1.43746e-15
RN7SL480P	ENSG00000266187	misc_RNA	1.23046	-2.61448	0.493937	-5.29315	1.20229e-07	5.41123e-07
AP001970.1	ENSG00000254710	lncRNA	1.55557	-2.6154	0.58557	-4.46641	7.95441e-06	2.6502e-05
RNY3P12	ENSG00000202297	misc_RNA	1.02694	-2.61567	0.499545	-5.23609	1.6401e-07	7.23167e-07
RN7SL503P	ENSG00000240374	misc_RNA	1.11849	-2.61593	0.443836	-5.89389	3.77198e-09	2.1473e-08
OR7E2P	ENSG00000255203	unprocessed_pseudogene	1.26953	-2.61734	0.362968	-7.21093	5.55703e-13	5.66427e-12
ATP6V0E1P1	ENSG00000225364	processed_pseudogene	3.06269	-2.61948	0.368887	-7.10104	1.23818e-12	1.19436e-11
AL158207.2	ENSG00000230684	lncRNA	2.58811	-2.61962	0.330034	-7.93744	2.06395e-15	3.04235e-14
AP001329.1	ENSG00000238372	snoRNA	0.885723	-2.62102	0.704502	-3.72039	0.000198917	0.000520062
AL445123.1	ENSG00000234675	lncRNA	0.773038	-2.62147	0.71869	-3.64757	0.000264733	0.000676311
AC092349.1	ENSG00000248803	processed_pseudogene	0.813422	-2.62215	0.541989	-4.83801	1.31147e-06	4.94896e-06
AC107896.1	ENSG00000267743	lncRNA	2.22131	-2.62231	0.438423	-5.98122	2.21474e-09	1.30283e-08
MIR1537	ENSG00000222831	miRNA	0.773197	-2.62381	0.763678	-3.43575	0.000590919	0.00141538
RNU6-444P	ENSG00000206715	snRNA	1.10856	-2.62409	0.34866	-7.52622	5.22314e-14	6.20249e-13
AC010970.1	ENSG00000225840	processed_pseudogene	53.0108	-2.62543	0.272692	-9.62783	6.10055e-22	2.48902e-20
AL138880.2	ENSG00000276156	unprocessed_pseudogene	0.732471	-2.62582	0.871229	-3.01392	0.00257895	0.0054821
AL391097.1	ENSG00000223492	lncRNA	2.15838	-2.62697	0.460317	-5.70688	1.15067e-08	6.06812e-08
NUTF2P3	ENSG00000228248	processed_pseudogene	1.06185	-2.62707	0.550105	-4.77558	1.79189e-06	6.60333e-06
MTOR-AS1	ENSG00000225602	lncRNA	2.78317	-2.62713	0.343206	-7.65467	1.93804e-14	2.46676e-13
NRON	ENSG00000253079	misc_RNA	1.14967	-2.62741	0.414186	-6.34354	2.2454e-10	1.54626e-09
RN7SL655P	ENSG00000241963	misc_RNA	1.01429	-2.62887	0.688238	-3.81971	0.000133608	0.00036
SNORA73	ENSG00000222145	snoRNA	0.804993	-2.63098	0.565149	-4.65537	3.23393e-06	1.14707e-05
AL365258.1	ENSG00000224901	lncRNA	1.89378	-2.63192	0.563551	-4.67025	3.00834e-06	1.07175e-05
AC125793.1	ENSG00000260832	lncRNA	0.618348	-2.63229	1.05641	-2.49173	0.0127121	0.02345
RNU6-979P	ENSG00000206623	snRNA	1.05394	-2.63394	0.440219	-5.98325	2.18726e-09	1.28786e-08
MIR2278	ENSG00000252153	miRNA	0.881513	-2.63613	0.524198	-5.02888	4.93361e-07	2.00189e-06
YBX1P7	ENSG00000232349	processed_pseudogene	2.14041	-2.63741	0.5622	-4.69124	2.7156e-06	9.74882e-06
AP000756.1	ENSG00000279341	TEC	1.70526	-2.63791	0.414283	-6.36742	1.92236e-10	1.3381e-09
AC108861.1	ENSG00000278408	lncRNA	0.970073	-2.63847	0.44282	-5.95833	2.54829e-09	1.48587e-08
RN7SL493P	ENSG00000266439	misc_RNA	1.15925	-2.63851	0.435533	-6.05812	1.37718e-09	8.37607e-09
MIR4451	ENSG00000266421	miRNA	0.970258	-2.63861	0.502341	-5.25263	1.49941e-07	6.65087e-07
AC112196.1	ENSG00000249112	lncRNA	2.42132	-2.63873	0.309988	-8.51236	1.70423e-17	3.49105e-16
RPL23AP36	ENSG00000225124	processed_pseudogene	1.52389	-2.63883	0.347905	-7.58491	3.32712e-14	4.08362e-13
RNF14P1	ENSG00000232915	processed_pseudogene	1.94767	-2.64021	0.359772	-7.33855	2.15912e-13	2.34311e-12
HECW1-IT1	ENSG00000181211	lncRNA	1.33556	-2.64113	0.615656	-4.28995	1.78716e-05	5.6113e-05
REG1A	ENSG00000115386	protein_coding	49.3073	-2.64306	0.372713	-7.09141	1.32753e-12	1.2732e-11
RN7SL7P	ENSG00000266794	misc_RNA	0.922339	-2.64386	0.595422	-4.44031	8.98292e-06	2.96819e-05
AC011939.2	ENSG00000261544	lncRNA	3.25363	-2.64386	0.338706	-7.80577	5.91378e-15	8.1147e-14
RNU6-151P	ENSG00000201028	snRNA	1.3478	-2.64462	0.388441	-6.80828	9.87743e-12	8.32738e-11
AP003467.2	ENSG00000254112	processed_pseudogene	3.2302	-2.6449	0.36405	-7.26523	3.72406e-13	3.89778e-12
RNY3P2	ENSG00000199788	misc_RNA	0.781311	-2.64672	0.967635	-2.73525	0.00623331	0.0122631
UBQLN3	ENSG00000175520	protein_coding	0.910782	-2.64678	0.555587	-4.76393	1.89859e-06	6.97053e-06
LINC01375	ENSG00000226159	lncRNA	0.847585	-2.647	0.740872	-3.57281	0.000353168	0.000881572
AC106827.1	ENSG00000203647	processed_pseudogene	2.08638	-2.64731	0.480006	-5.51515	3.4848e-08	1.70673e-07
SRGAP3-AS3	ENSG00000227929	lncRNA	1.20652	-2.64924	0.678693	-3.90345	9.48312e-05	0.000262321
LINC02316	ENSG00000258912	lncRNA	1.30423	-2.64939	0.388858	-6.81326	9.54137e-12	8.05321e-11
RNU6-920P	ENSG00000222858	snRNA	1.89687	-2.65077	0.319782	-8.28932	1.13894e-16	2.03255e-15
AC016027.3	ENSG00000235445	lncRNA	0.886375	-2.65111	0.478087	-5.54523	2.93564e-08	1.45399e-07
AC007919.2	ENSG00000231384	processed_pseudogene	1.97492	-2.65114	0.377638	-7.02031	2.21377e-12	2.05792e-11
AP006248.4	ENSG00000279932	lncRNA	2.31694	-2.65285	0.386028	-6.87218	6.32268e-12	5.47154e-11
Y_RNA	ENSG00000199762	misc_RNA	1.31524	-2.6538	0.464594	-5.71207	1.1161e-08	5.8998e-08
KF455155.1	ENSG00000270708	processed_pseudogene	0.860658	-2.65513	0.546215	-4.86095	1.16821e-06	4.4461e-06
AC044781.1	ENSG00000229751	lncRNA	2.7762	-2.65523	0.287436	-9.23764	2.52005e-20	8.0338e-19
RNU4ATAC12P	ENSG00000252269	snRNA	3.6263	-2.65653	0.271758	-9.77536	1.43642e-22	6.49854e-21
RN7SL615P	ENSG00000263989	misc_RNA	1.14901	-2.65732	0.565985	-4.69505	2.66546e-06	9.58504e-06
MIR626	ENSG00000207766	miRNA	0.698386	-2.65804	0.819843	-3.24213	0.00118639	0.00268613
MIR511	ENSG00000207938	miRNA	0.793051	-2.65909	0.639416	-4.15862	3.20173e-05	9.62856e-05
AL449983.1	ENSG00000231756	lncRNA	1.67203	-2.6593	0.376076	-7.07117	1.53632e-12	1.46271e-11
AIG1P1	ENSG00000249089	unprocessed_pseudogene	1.47385	-2.65971	0.470086	-5.65791	1.53227e-08	7.91532e-08
AC008649.2	ENSG00000267375	lncRNA	3.27551	-2.66017	0.264505	-10.0572	8.53955e-24	4.60328e-22
AC006529.1	ENSG00000240579	processed_pseudogene	2.13187	-2.66063	0.286985	-9.27097	1.84454e-20	6.02722e-19
RN7SL769P	ENSG00000276956	misc_RNA	1.0523	-2.66067	0.516441	-5.15193	2.57815e-07	1.09813e-06
SCARNA18	ENSG00000238835	snoRNA	2.86285	-2.66233	0.320753	-8.30025	1.03896e-16	1.86761e-15
RNU7-96P	ENSG00000238719	snRNA	0.97961	-2.66235	0.593062	-4.48916	7.1505e-06	2.39943e-05
AC092332.1	ENSG00000260064	lncRNA	1.5642	-2.66237	0.398427	-6.68221	2.35361e-11	1.87816e-10
AL831737.1	ENSG00000236327	processed_pseudogene	2.50274	-2.6626	0.331501	-8.03197	9.59219e-16	1.4848e-14
FABP5P5	ENSG00000213716	processed_pseudogene	0.660368	-2.66349	0.970957	-2.74316	0.00608514	0.012012
Y_RNA	ENSG00000199938	misc_RNA	2.01006	-2.66446	0.604517	-4.40758	1.04533e-05	3.41809e-05
RN7SL47P	ENSG00000244710	misc_RNA	1.48387	-2.66455	0.416726	-6.39402	1.61585e-10	1.13739e-09
AC092135.1	ENSG00000279294	TEC	3.04982	-2.66466	0.263462	-10.114	4.78813e-24	2.68184e-22
WASF1P1	ENSG00000227597	processed_pseudogene	1.00258	-2.66693	0.438918	-6.07614	1.23107e-09	7.55772e-09
Z98749.1	ENSG00000229955	lncRNA	3.52124	-2.66749	0.290088	-9.19544	3.73455e-20	1.16061e-18
YY1P1	ENSG00000230661	processed_pseudogene	2.41698	-2.66752	0.345911	-7.71156	1.24285e-14	1.6266e-13
TUSC7	ENSG00000243197	lncRNA	1.01844	-2.66932	0.717473	-3.72044	0.000198874	0.00052004
RN7SKP283	ENSG00000253006	misc_RNA	0.802884	-2.66934	0.79085	-3.37529	0.000737391	0.00173417
RAI1-AS1	ENSG00000237328	lncRNA	2.83842	-2.66941	0.287463	-9.2861	1.60047e-20	5.27621e-19
MTND5P5	ENSG00000251149	processed_pseudogene	0.827793	-2.66946	0.82583	-3.23246	0.0012273	0.00277156
LARGE-IT1	ENSG00000232081	lncRNA	0.773513	-2.66966	0.547296	-4.87791	1.07217e-06	4.10872e-06
CYCSP4	ENSG00000229120	processed_pseudogene	1.47497	-2.67101	0.408033	-6.54607	5.90712e-11	4.44202e-10
CCNB2P1	ENSG00000214998	processed_pseudogene	2.42795	-2.67153	0.31652	-8.44032	3.16477e-17	6.17839e-16
AC020893.1	ENSG00000248930	processed_pseudogene	3.29346	-2.67153	0.325683	-8.20288	2.34702e-16	4.01148e-15
ARHGAP15-AS1	ENSG00000231758	lncRNA	3.90186	-2.67305	0.293059	-9.12121	7.42879e-20	2.20986e-18
AL450003.1	ENSG00000230694	lncRNA	0.887535	-2.67345	0.95874	-2.7885	0.00529522	0.01059
MIR605	ENSG00000207813	miRNA	0.730676	-2.67503	1.02241	-2.61638	0.00888666	0.0169348
AL157392.1	ENSG00000225112	lncRNA	0.854662	-2.67509	0.502455	-5.32403	1.0149e-07	4.62068e-07
AC022001.2	ENSG00000271716	lncRNA	2.55196	-2.67548	0.278519	-9.60609	7.53545e-22	3.02179e-20
SNORD63	ENSG00000251987	snoRNA	0.772517	-2.67576	1.0773	-2.48377	0.0129999	0.0239234
AP000857.1	ENSG00000255396	processed_pseudogene	0.848355	-2.67634	1.11232	-2.40609	0.0161244	0.0290894
AL358178.1	ENSG00000216813	processed_pseudogene	2.78881	-2.67692	0.333022	-8.03825	9.11269e-16	1.41699e-14
AC007608.2	ENSG00000260029	lncRNA	1.40734	-2.67696	0.510729	-5.24145	1.59317e-07	7.0373e-07
AC004945.1	ENSG00000222024	processed_pseudogene	1.04011	-2.67761	0.731181	-3.66203	0.000250221	0.00064215
AP006442.1	ENSG00000252778	scaRNA	0.833585	-2.67768	0.622058	-4.30455	1.67324e-05	5.27823e-05
RPL23AP50	ENSG00000232778	processed_pseudogene	2.83938	-2.67954	0.279349	-9.59208	8.63298e-22	3.42485e-20
AC009269.2	ENSG00000259532	lncRNA	2.24475	-2.67987	0.321024	-8.34788	6.94984e-17	1.28406e-15
SNORD116	ENSG00000252985	snoRNA	1.62615	-2.68106	0.366679	-7.31173	2.63719e-13	2.82197e-12
AC008269.2	ENSG00000260171	lncRNA	1.10644	-2.68114	0.403425	-6.64594	3.01289e-11	2.36688e-10
RN7SKP92	ENSG00000253075	misc_RNA	0.693334	-2.68231	0.913722	-2.93559	0.00332917	0.00692621
AL157832.2	ENSG00000237224	lncRNA	1.84276	-2.68337	0.316737	-8.47193	2.41368e-17	4.79843e-16
LINC02250	ENSG00000235731	lncRNA	1.9788	-2.68468	0.356343	-7.53399	4.92115e-14	5.87683e-13
AC100840.1	ENSG00000201071	misc_RNA	1.38552	-2.68471	0.355833	-7.54485	4.52804e-14	5.43658e-13
RNF113B	ENSG00000139797	protein_coding	4.07024	-2.68479	0.272415	-9.85551	6.48842e-23	3.09606e-21
UBE2CP3	ENSG00000250384	processed_pseudogene	2.00551	-2.68538	0.473303	-5.67371	1.3974e-08	7.27611e-08
AMELX	ENSG00000125363	protein_coding	1.81142	-2.68548	0.53945	-4.97817	6.41872e-07	2.55462e-06
AC004986.1	ENSG00000227573	processed_pseudogene	1.52709	-2.68552	0.42218	-6.36109	2.00327e-10	1.39116e-09
AL356273.1	ENSG00000233583	processed_pseudogene	2.29228	-2.68582	0.312718	-8.58863	8.80147e-18	1.88636e-16
RNU6-177P	ENSG00000223189	snRNA	0.857688	-2.68643	0.721529	-3.72324	0.000196681	0.000514822
RNU6-212P	ENSG00000199512	snRNA	0.909668	-2.68806	0.639801	-4.20139	2.65278e-05	8.08875e-05
AL050343.1	ENSG00000212624	snoRNA	0.872439	-2.68839	0.519373	-5.17622	2.26425e-07	9.73469e-07
RNU6-1111P	ENSG00000212420	snRNA	1.1547	-2.68858	0.466582	-5.76228	8.29842e-09	4.47222e-08
AC011242.1	ENSG00000229695	processed_pseudogene	2.2035	-2.68964	0.339999	-7.91072	2.55904e-15	3.72035e-14
RNU6-1208P	ENSG00000238482	snRNA	1.07523	-2.68991	0.65069	-4.13393	3.56614e-05	0.000106353
ZNF859P	ENSG00000215887	unprocessed_pseudogene	0.895559	-2.69011	0.532893	-5.04812	4.46181e-07	1.82176e-06
AC046158.4	ENSG00000279887	TEC	2.90006	-2.69027	0.325003	-8.2777	1.25579e-16	2.22411e-15
AC084290.1	ENSG00000229899	processed_pseudogene	2.26848	-2.69103	0.475772	-5.65613	1.54822e-08	7.99494e-08
U4	ENSG00000273744	snRNA	0.786805	-2.6913	0.711828	-3.78083	0.000156304	0.000416063
MIR5687	ENSG00000265135	miRNA	1.25421	-2.69138	0.643809	-4.18041	2.90989e-05	8.81649e-05
AL590128.1	ENSG00000227950	processed_pseudogene	2.14318	-2.6921	0.314728	-8.55373	1.19173e-17	2.49758e-16
MIR4265	ENSG00000264934	miRNA	0.836236	-2.69463	0.736103	-3.66067	0.000251555	0.000645313
AL162385.1	ENSG00000228174	lncRNA	0.982607	-2.69585	0.526353	-5.12174	3.02727e-07	1.27188e-06
AC009656.1	ENSG00000255060	lncRNA	1.41484	-2.69661	0.46778	-5.76469	8.18077e-09	4.4147e-08
AC013640.1	ENSG00000261191	lncRNA	1.05432	-2.6973	0.55636	-4.84812	1.24639e-06	4.72304e-06
AL139120.1	ENSG00000233340	lncRNA	2.28084	-2.69734	0.476673	-5.65868	1.52544e-08	7.88281e-08
RNU6-1327P	ENSG00000202172	snRNA	1.4516	-2.69745	0.415387	-6.49384	8.36781e-11	6.14589e-10
HMGB3P9	ENSG00000229992	processed_pseudogene	3.4716	-2.69782	0.290291	-9.29352	1.49271e-20	4.94295e-19
AC002558.3	ENSG00000262265	lncRNA	3.23362	-2.69869	0.277869	-9.71211	2.67746e-22	1.15604e-20
Y_RNA	ENSG00000202273	misc_RNA	1.01125	-2.69966	0.737827	-3.65893	0.000253266	0.000649291
PDSS1P1	ENSG00000182347	processed_pseudogene	4.20124	-2.70102	0.311929	-8.65908	4.75569e-18	1.06978e-16
AL121952.1	ENSG00000218757	processed_pseudogene	2.91176	-2.70132	0.423269	-6.38205	1.74732e-10	1.2245e-09
AC097504.1	ENSG00000250189	processed_pseudogene	0.885785	-2.70202	0.679377	-3.9772	6.97301e-05	0.000197242
CTD-2350J17.1	ENSG00000250250	lncRNA	1.00392	-2.70313	0.68986	-3.91838	8.91452e-05	0.000247795
AC010609.1	ENSG00000253980	lncRNA	2.40066	-2.70361	0.360188	-7.5061	6.0914e-14	7.16279e-13
DAB1-AS1	ENSG00000226759	lncRNA	0.830789	-2.70422	0.628997	-4.29926	1.71368e-05	5.39642e-05
RNVU1-18	ENSG00000206737	snRNA	0.907963	-2.70447	0.959633	-2.81824	0.00482884	0.00973209
RN7SL630P	ENSG00000264978	misc_RNA	1.12117	-2.70634	0.54989	-4.92161	8.58366e-07	3.34736e-06
AP001172.2	ENSG00000270139	lncRNA	0.944304	-2.70755	1.15643	-2.34129	0.0192173	0.0340748
CBX5P1	ENSG00000241535	processed_pseudogene	3.39138	-2.70789	0.314764	-8.60294	7.77001e-18	1.6815e-16
AC130650.1	ENSG00000262529	lncRNA	3.54214	-2.70816	0.275348	-9.83539	7.92577e-23	3.73781e-21
AC021766.1	ENSG00000280365	TEC	1.85521	-2.70943	0.479409	-5.6516	1.58965e-08	8.19461e-08
AC005183.1	ENSG00000271500	processed_pseudogene	4.21075	-2.71033	0.319317	-8.48789	2.10419e-17	4.2196e-16
AC016292.1	ENSG00000235361	lncRNA	1.7826	-2.71113	0.340004	-7.97383	1.53831e-15	2.31199e-14
MACROD2-AS1	ENSG00000235914	lncRNA	1.53449	-2.71169	0.379005	-7.15477	8.38137e-13	8.2904e-12
RNU11	ENSG00000274978	snRNA	2.97345	-2.71262	0.282778	-9.59277	8.57545e-22	3.40811e-20
RN7SKP130	ENSG00000201794	misc_RNA	1.26966	-2.71361	0.41543	-6.53205	6.48754e-11	4.84409e-10
AL353691.1	ENSG00000229822	processed_pseudogene	1.8174	-2.71403	0.320302	-8.47336	2.38419e-17	4.74618e-16
AC026427.2	ENSG00000251001	processed_pseudogene	1.09066	-2.71478	0.57727	-4.70279	2.56633e-06	9.2517e-06
CACYBPP1	ENSG00000225928	processed_pseudogene	3.61694	-2.71567	0.277856	-9.77366	1.46077e-22	6.59528e-21
RNU4ATAC16P	ENSG00000221439	snRNA	2.55959	-2.71625	0.347485	-7.8169	5.41391e-15	7.47725e-14
RPL31P20	ENSG00000229756	processed_pseudogene	0.829934	-2.71625	0.848603	-3.20085	0.00137022	0.0030686
RN7SL430P	ENSG00000243911	misc_RNA	1.75241	-2.71674	0.500021	-5.43325	5.53358e-08	2.62888e-07
AL138713.1	ENSG00000280348	TEC	2.97352	-2.71675	0.443223	-6.12952	8.8145e-10	5.52733e-09
RN7SKP291	ENSG00000199831	misc_RNA	0.661324	-2.719	1.14651	-2.37155	0.0177137	0.031674
AL118558.2	ENSG00000259013	processed_pseudogene	1.39349	-2.71939	0.376104	-7.23041	4.81522e-13	4.95815e-12
AC013549.2	ENSG00000252329	scaRNA	0.777264	-2.71945	0.790419	-3.44051	0.000580617	0.00139288
ENSAP1	ENSG00000224274	processed_pseudogene	0.898039	-2.71957	0.483405	-5.62586	1.84588e-08	9.43348e-08
AL356121.2	ENSG00000279498	TEC	0.79589	-2.72032	0.57967	-4.69288	2.69381e-06	9.67449e-06
COX6CP14	ENSG00000239576	processed_pseudogene	1.85727	-2.72117	0.371434	-7.32613	2.36889e-13	2.55578e-12
RNU6-998P	ENSG00000251703	snRNA	2.18243	-2.72124	0.390145	-6.97496	3.0595e-12	2.78075e-11
Z82205.1	ENSG00000227064	processed_pseudogene	1.82555	-2.72231	0.417244	-6.52451	6.8226e-11	5.07382e-10
MTND1P11	ENSG00000228166	unprocessed_pseudogene	2.37709	-2.72262	0.364854	-7.46221	8.50856e-14	9.81309e-13
AC090617.7	ENSG00000279340	TEC	2.10469	-2.72278	0.2883	-9.44425	3.57969e-21	1.29639e-19
Y_RNA	ENSG00000201800	misc_RNA	1.16862	-2.72354	0.537104	-5.07079	3.96172e-07	1.63241e-06
KLF4P1	ENSG00000233186	processed_pseudogene	1.36109	-2.72361	0.530255	-5.13642	2.80015e-07	1.18328e-06
C12orf40	ENSG00000180116	protein_coding	2.77454	-2.72436	0.300117	-9.07766	1.10937e-19	3.20363e-18
AL365273.1	ENSG00000240527	lncRNA	0.899693	-2.72438	0.660253	-4.12626	3.68708e-05	0.000109644
AC013467.1	ENSG00000270799	processed_pseudogene	2.13063	-2.72557	0.36407	-7.48638	7.07996e-14	8.24889e-13
DPRXP5	ENSG00000270652	processed_pseudogene	1.02	-2.72572	0.47204	-5.77435	7.72518e-09	4.18204e-08
SNORD71	ENSG00000223224	snoRNA	2.03274	-2.72666	0.3296	-8.27264	1.31027e-16	2.31783e-15
AC016542.3	ENSG00000280166	TEC	3.04479	-2.72718	0.423564	-6.43864	1.20551e-10	8.64146e-10
AC124916.2	ENSG00000270285	processed_pseudogene	1.86873	-2.72732	0.38648	-7.05682	1.70352e-12	1.61086e-11
RN7SKP71	ENSG00000201428	misc_RNA	3.70452	-2.7278	0.563934	-4.83709	1.31754e-06	4.9702e-06
RN7SL144P	ENSG00000242559	misc_RNA	2.12367	-2.72819	0.391928	-6.96094	3.38005e-12	3.04904e-11
RN7SL711P	ENSG00000276047	misc_RNA	1.69505	-2.72839	0.320679	-8.50816	1.76723e-17	3.60183e-16
WASF3-AS1	ENSG00000237001	lncRNA	1.08158	-2.73068	0.405579	-6.73279	1.66442e-11	1.35841e-10
AC011406.1	ENSG00000248696	processed_pseudogene	1.88201	-2.73215	0.36542	-7.47675	7.61807e-14	8.8411e-13
RAD51AP1P1	ENSG00000214283	processed_pseudogene	2.10901	-2.73374	0.588863	-4.6424	3.44386e-06	1.2159e-05
MIR938	ENSG00000216035	miRNA	1.25586	-2.73474	0.413856	-6.60795	3.89673e-11	3.00808e-10
AL512326.2	ENSG00000212338	snoRNA	1.10032	-2.73688	0.56122	-4.87666	1.07895e-06	4.13183e-06
ANXA10	ENSG00000109511	protein_coding	221.089	-2.73718	0.259392	-10.5523	4.95571e-26	3.71653e-24
RBBP8P1	ENSG00000230399	processed_pseudogene	3.74415	-2.73721	0.298543	-9.16856	4.79358e-20	1.46214e-18
RN7SKP95	ENSG00000199730	misc_RNA	1.40124	-2.73751	0.501527	-5.45835	4.80581e-08	2.30256e-07
AC090971.6	ENSG00000274954	lncRNA	1.22289	-2.73768	0.499312	-5.4829	4.184e-08	2.0204e-07
RPS26P18	ENSG00000229087	processed_pseudogene	0.891334	-2.73776	0.540128	-5.06873	4.00473e-07	1.64829e-06
AP003086.2	ENSG00000254649	lncRNA	2.28384	-2.73809	0.408523	-6.70243	2.04985e-11	1.65087e-10
MTFR2P1	ENSG00000233716	processed_pseudogene	3.50357	-2.73861	0.260448	-10.515	7.37083e-26	5.3737e-24
AL137818.1	ENSG00000253059	snoRNA	1.41706	-2.73925	0.547908	-4.99947	5.74881e-07	2.30845e-06
AL451047.1	ENSG00000228625	lncRNA	2.98895	-2.73965	0.291187	-9.40853	5.03113e-21	1.77857e-19
RNU6-1112P	ENSG00000200455	snRNA	0.848098	-2.74074	0.753937	-3.63523	0.000277729	0.000706709
AC109583.2	ENSG00000238013	processed_pseudogene	1.06429	-2.74087	0.640533	-4.27904	1.87698e-05	5.8755e-05
AF181450.1	ENSG00000253576	lncRNA	1.65911	-2.74126	0.327491	-8.37046	5.73927e-17	1.06973e-15
AC055733.4	ENSG00000252894	misc_RNA	1.01667	-2.74158	0.744644	-3.68174	0.000231651	0.000598466
SULT1C3	ENSG00000196228	protein_coding	1.72308	-2.74222	0.419218	-6.54127	6.09978e-11	4.57607e-10
AC084824.2	ENSG00000257643	processed_pseudogene	1.76603	-2.74308	0.350922	-7.81679	5.41891e-15	7.48183e-14
Metazoa_SRP	ENSG00000278701	misc_RNA	1.27708	-2.74526	0.650598	-4.2196	2.44733e-05	7.51226e-05
AC016251.1	ENSG00000280291	TEC	2.0718	-2.74538	0.388272	-7.07077	1.54075e-12	1.46661e-11
AL133480.1	ENSG00000233367	lncRNA	2.06059	-2.74611	0.352984	-7.77969	7.27014e-15	9.86626e-14
RN7SKP219	ENSG00000252634	misc_RNA	1.19635	-2.7466	0.491139	-5.59232	2.24057e-08	1.12948e-07
SNORA74D	ENSG00000252213	snoRNA	4.64431	-2.74673	0.406958	-6.74941	1.48445e-11	1.22185e-10
EIF2S2P5	ENSG00000225650	processed_pseudogene	2.07192	-2.74682	0.381587	-7.1984	6.0923e-13	6.17308e-12
RNU6-202P	ENSG00000251807	snRNA	1.10594	-2.74692	0.680967	-4.03385	5.48709e-05	0.000158343
RN7SL791P	ENSG00000241291	misc_RNA	0.888028	-2.74711	0.766952	-3.58186	0.000341159	0.000854444
AL513185.1	ENSG00000226163	lncRNA	1.19034	-2.74791	0.525736	-5.22679	1.72479e-07	7.57579e-07
SNORA46	ENSG00000207493	snoRNA	3.10157	-2.74941	0.303522	-9.05837	1.32416e-19	3.77004e-18
AC139792.3	ENSG00000279995	TEC	1.35172	-2.75128	0.493333	-5.57692	2.44812e-08	1.22687e-07
H3P42	ENSG00000271626	processed_pseudogene	1.25726	-2.75224	0.409893	-6.71454	1.88657e-11	1.52739e-10
AC006028.1	ENSG00000231357	processed_pseudogene	2.17941	-2.75297	0.312411	-8.81203	1.22895e-18	3.03632e-17
AC026888.1	ENSG00000258829	lncRNA	0.855448	-2.75341	0.865018	-3.18307	0.00145721	0.00324871
RNU6-1237P	ENSG00000207508	snRNA	1.39891	-2.7539	0.447555	-6.1532	7.59367e-10	4.8072e-09
MRPS10P2	ENSG00000234325	processed_pseudogene	1.05949	-2.75568	0.587345	-4.69176	2.70871e-06	9.72563e-06
AL031668.1	ENSG00000228386	lncRNA	4.0102	-2.7563	0.291327	-9.46118	3.04476e-21	1.1189e-19
MIR548K	ENSG00000221333	miRNA	1.50567	-2.75898	0.550397	-5.01271	5.36683e-07	2.16661e-06
Y_RNA	ENSG00000201501	misc_RNA	1.73733	-2.7591	0.368356	-7.49031	6.871e-14	8.01383e-13
RPL12P24	ENSG00000243601	processed_pseudogene	1.39207	-2.76149	0.540164	-5.11232	3.18228e-07	1.3326e-06
AL442071.1	ENSG00000226438	lncRNA	2.13902	-2.76419	0.353333	-7.8232	5.14962e-15	7.14551e-14
AL353149.1	ENSG00000275015	unprocessed_pseudogene	0.900972	-2.76554	0.449325	-6.15488	7.51322e-10	4.7583e-09
AC090971.5	ENSG00000259632	processed_pseudogene	3.9887	-2.7692	0.280009	-9.88968	4.61508e-23	2.26287e-21
AC099313.1	ENSG00000260594	lncRNA	1.2666	-2.76929	0.619308	-4.47159	7.76402e-06	2.58948e-05
AC013549.3	ENSG00000254688	lncRNA	2.37651	-2.76965	0.406116	-6.81984	9.11396e-12	7.71296e-11
RNU6-750P	ENSG00000212248	snRNA	1.04562	-2.77113	0.619065	-4.47632	7.59415e-06	2.53797e-05
RNU1-19P	ENSG00000200176	snRNA	1.28443	-2.77246	0.509887	-5.4374	5.40624e-08	2.57195e-07
AC037441.2	ENSG00000253142	lncRNA	1.52416	-2.77281	0.375334	-7.38757	1.49533e-13	1.66292e-12
AC010468.1	ENSG00000249318	lncRNA	1.43781	-2.77306	0.448131	-6.18806	6.09094e-10	3.90706e-09
AC008534.2	ENSG00000276514	misc_RNA	0.823484	-2.77381	1.08044	-2.56729	0.0102497	0.0192802
PTPRJ-AS1	ENSG00000254879	lncRNA	4.43388	-2.77393	0.273506	-10.1421	3.59254e-24	2.05621e-22
RNU6-1214P	ENSG00000200520	snRNA	0.911151	-2.77503	0.645502	-4.29903	1.71545e-05	5.40123e-05
RNU6-608P	ENSG00000206654	snRNA	2.07346	-2.77633	0.501646	-5.53445	3.12201e-08	1.54064e-07
AC092608.1	ENSG00000248629	lncRNA	1.78884	-2.77698	0.599276	-4.63389	3.58863e-06	1.26351e-05
Y_RNA	ENSG00000201343	misc_RNA	1.9896	-2.77704	0.622623	-4.46022	8.18752e-06	2.72175e-05
AC009884.2	ENSG00000270255	processed_pseudogene	1.39006	-2.77852	0.393719	-7.05712	1.69984e-12	1.60772e-11
RN7SL174P	ENSG00000243333	misc_RNA	0.958778	-2.77905	0.624554	-4.44965	8.60087e-06	2.84978e-05
AC025038.1	ENSG00000236556	lncRNA	0.903541	-2.7799	0.697261	-3.98689	6.69446e-05	0.000190039
CDY4P	ENSG00000228411	processed_pseudogene	0.974659	-2.78124	0.634115	-4.38602	1.15446e-05	3.74725e-05
AL391839.1	ENSG00000229327	lncRNA	2.3316	-2.78366	0.370671	-7.50979	5.92226e-14	6.97312e-13
LDLRAD4-AS1	ENSG00000267690	lncRNA	4.27529	-2.78437	0.234485	-11.8744	1.6077e-32	2.93023e-30
AC064852.1	ENSG00000241409	lncRNA	1.83579	-2.7848	0.409505	-6.80041	1.04324e-11	8.77201e-11
Y_RNA	ENSG00000199881	misc_RNA	0.773882	-2.78535	0.65469	-4.25447	2.09548e-05	6.50225e-05
AC002429.1	ENSG00000231153	processed_pseudogene	0.726361	-2.78537	0.915433	-3.04268	0.00234479	0.00502422
AC244131.2	ENSG00000275119	lncRNA	1.18395	-2.78678	0.487314	-5.71865	1.07373e-08	5.69411e-08
AC020728.1	ENSG00000271410	processed_pseudogene	2.57151	-2.78686	0.344472	-8.09024	5.95462e-16	9.55661e-15
HS6ST2-AS1	ENSG00000235849	lncRNA	0.983444	-2.78768	0.445876	-6.25215	4.0485e-10	2.67248e-09
AL645730.1	ENSG00000279324	TEC	0.823052	-2.78983	0.668759	-4.17165	3.02403e-05	9.13744e-05
AC092608.3	ENSG00000280284	TEC	1.74661	-2.79167	0.751058	-3.71698	0.000201619	0.000526538
AC090241.1	ENSG00000267587	processed_pseudogene	1.99848	-2.79201	0.319478	-8.7393	2.34556e-18	5.53084e-17
SEMA5A-AS1	ENSG00000251370	lncRNA	2.20726	-2.79262	0.364999	-7.65105	1.99352e-14	2.53303e-13
TAF9BP1	ENSG00000213871	processed_pseudogene	3.85687	-2.79333	0.268996	-10.3843	2.92419e-25	1.9585e-23
RNU6-128P	ENSG00000206703	snRNA	0.941001	-2.79469	0.713786	-3.91531	9.02883e-05	0.00025069
AC131182.1	ENSG00000250698	lncRNA	4.68858	-2.7949	0.300305	-9.30686	1.31661e-20	4.39583e-19
RNU6-171P	ENSG00000207082	snRNA	0.924222	-2.79773	0.520874	-5.37122	7.82074e-08	3.62598e-07
AC008700.1	ENSG00000248125	lncRNA	1.74538	-2.79816	0.37595	-7.44289	9.85058e-14	1.12471e-12
MFFP1	ENSG00000215720	processed_pseudogene	3.65524	-2.79837	0.262621	-10.6555	1.64282e-26	1.29538e-24
RN7SL8P	ENSG00000243352	misc_RNA	20.0817	-2.79839	0.21503	-13.014	1.01912e-38	4.578e-36
NAV2-AS5	ENSG00000255043	lncRNA	2.49015	-2.7985	0.387684	-7.2185	5.25638e-13	5.37524e-12
MIR5190	ENSG00000266146	miRNA	1.17599	-2.7985	0.502267	-5.57174	2.52202e-08	1.26078e-07
RN7SL342P	ENSG00000239398	misc_RNA	1.10483	-2.79867	0.709858	-3.94257	8.06122e-05	0.000225669
AC105429.2	ENSG00000276393	unprocessed_pseudogene	2.21469	-2.7994	0.311298	-8.99268	2.41273e-19	6.61931e-18
AC134050.1	ENSG00000241537	processed_pseudogene	2.1068	-2.80084	0.312876	-8.95191	3.49384e-19	9.32083e-18
MTCYBP43	ENSG00000250624	unprocessed_pseudogene	1.17618	-2.80123	0.5382	-5.20481	1.94198e-07	8.45241e-07
AL136313.1	ENSG00000280443	TEC	1.29266	-2.8049	0.80939	-3.46546	0.000529335	0.00127875
AC078843.1	ENSG00000200113	snoRNA	0.860844	-2.80652	0.739281	-3.79629	0.00014688	0.000393165
FOXN3-AS2	ENSG00000259073	lncRNA	2.14366	-2.80657	0.491048	-5.71548	1.09393e-08	5.79294e-08
RNU6-310P	ENSG00000207385	snRNA	0.806028	-2.80866	0.764741	-3.6727	0.00024	0.000618096
AC006484.1	ENSG00000223841	processed_pseudogene	0.852731	-2.80909	0.774953	-3.62485	0.00028913	0.000733538
AC105224.1	ENSG00000267591	processed_pseudogene	0.920891	-2.81063	1.00114	-2.80744	0.00499365	0.0100379
AC112673.1	ENSG00000249848	processed_pseudogene	1.5321	-2.81065	0.356865	-7.87595	3.38169e-15	4.81558e-14
RN7SL760P	ENSG00000272469	misc_RNA	2.70477	-2.81158	0.344697	-8.15667	3.44386e-16	5.71688e-15
GTF3AP2	ENSG00000258966	transcribed_processed_pseudogene	1.09072	-2.81163	0.655481	-4.28941	1.79149e-05	5.62449e-05
RC3H1-IT1	ENSG00000236535	lncRNA	3.88086	-2.81234	0.320454	-8.77609	1.69257e-18	4.08198e-17
RN7SKP56	ENSG00000222445	misc_RNA	1.51502	-2.81267	0.636179	-4.42119	9.81582e-06	3.22138e-05
RPL22P21	ENSG00000233979	processed_pseudogene	1.20525	-2.8134	0.496648	-5.66478	1.47211e-08	7.63026e-08
RPL23AP23	ENSG00000236863	processed_pseudogene	4.09261	-2.81405	0.309134	-9.10301	8.78663e-20	2.57757e-18
RN7SL296P	ENSG00000275090	misc_RNA	4.13999	-2.81529	0.390623	-7.20719	5.71198e-13	5.81023e-12
AL078599.2	ENSG00000232031	lncRNA	2.49918	-2.8155	0.363467	-7.74623	9.46626e-15	1.26232e-13
COX5BP3	ENSG00000235967	processed_pseudogene	2.42558	-2.81617	0.410105	-6.86695	6.55909e-12	5.664e-11
FER1L6-AS1	ENSG00000181171	lncRNA	1.01795	-2.81811	0.489941	-5.75195	8.82213e-09	4.73609e-08
RN7SL297P	ENSG00000240183	misc_RNA	2.04947	-2.81899	0.50174	-5.61843	1.92699e-08	9.81527e-08
AF178030.1	ENSG00000227170	lncRNA	2.55926	-2.82064	0.41203	-6.84573	7.60851e-12	6.51455e-11
LTV1P1	ENSG00000250219	processed_pseudogene	0.967392	-2.8207	0.761481	-3.70423	0.000212031	0.000551623
MIR603	ENSG00000207930	miRNA	0.873039	-2.82465	0.638685	-4.4226	9.75206e-06	3.20211e-05
PHACTR2-AS1	ENSG00000235740	lncRNA	4.74232	-2.82519	0.286893	-9.84753	7.02468e-23	3.33763e-21
MTND4LP9	ENSG00000227795	processed_pseudogene	1.12108	-2.82633	0.588443	-4.80306	1.56257e-06	5.81269e-06
AL163192.1	ENSG00000237734	lncRNA	2.8395	-2.82963	0.346041	-8.17715	2.90624e-16	4.90313e-15
AC131210.1	ENSG00000240888	lncRNA	1.03954	-2.82984	0.595076	-4.75542	1.98034e-06	7.25151e-06
AC019070.1	ENSG00000212181	snoRNA	0.86442	-2.83095	0.686933	-4.12115	3.76991e-05	0.00011192
ONECUT3	ENSG00000205922	protein_coding	31.4836	-2.83159	0.281209	-10.0693	7.54966e-24	4.09949e-22
AC076966.1	ENSG00000201957	snoRNA	1.22567	-2.83199	0.544889	-5.19736	2.02133e-07	8.77516e-07
AC007151.1	ENSG00000262516	processed_pseudogene	2.86593	-2.83293	0.276634	-10.2407	1.30247e-24	7.91306e-23
RERG-AS1	ENSG00000255660	lncRNA	1.08208	-2.83352	0.511376	-5.54097	3.00794e-08	1.48731e-07
AC018511.2	ENSG00000234149	lncRNA	1.0017	-2.83922	0.453604	-6.25925	3.86826e-10	2.56225e-09
OR52T1P	ENSG00000233646	unprocessed_pseudogene	1.204	-2.83981	0.516858	-5.49437	3.921e-08	1.90122e-07
MIR3619	ENSG00000266533	miRNA	1.16087	-2.84026	0.415762	-6.83145	8.40596e-12	7.14234e-11
RNY4P34	ENSG00000201649	misc_RNA	1.58004	-2.84317	0.479855	-5.92506	3.12181e-09	1.7965e-08
NDUFS5P1	ENSG00000218424	processed_pseudogene	0.879062	-2.84415	0.812094	-3.50224	0.000461369	0.0011265
HINT1P2	ENSG00000271159	processed_pseudogene	1.01944	-2.84424	0.640508	-4.44061	8.9706e-06	2.96456e-05
HSPE1P13	ENSG00000225900	processed_pseudogene	2.52383	-2.84434	0.357042	-7.9664	1.63368e-15	2.44211e-14
AC009884.1	ENSG00000253335	lncRNA	2.4371	-2.84443	0.387326	-7.34377	2.07666e-13	2.25858e-12
AC040978.1	ENSG00000274064	processed_pseudogene	1.69741	-2.84474	0.361052	-7.87902	3.29964e-15	4.70627e-14
MIR1256	ENSG00000221808	miRNA	0.962559	-2.84634	0.593548	-4.79547	1.62291e-06	6.01802e-06
RNU7-84P	ENSG00000251892	snRNA	2.10173	-2.8465	0.385842	-7.37737	1.61451e-13	1.78684e-12
AL513412.1	ENSG00000224972	lncRNA	3.01734	-2.848	0.404623	-7.03864	1.94127e-12	1.82097e-11
AC016866.2	ENSG00000265128	lncRNA	2.23426	-2.84946	0.435486	-6.54317	6.02276e-11	4.52363e-10
AC211469.1	ENSG00000270555	processed_pseudogene	1.10496	-2.85008	0.505049	-5.64319	1.6693e-08	8.57936e-08
AL355497.3	ENSG00000238594	snoRNA	0.880988	-2.85258	0.840656	-3.39327	0.000690624	0.00163422
MIR562	ENSG00000207626	miRNA	0.755438	-2.85259	0.821389	-3.47288	0.000514906	0.00124647
ATP5PBP1	ENSG00000224451	processed_pseudogene	1.98323	-2.85262	0.360129	-7.9211	2.35424e-15	3.43835e-14
AL136298.2	ENSG00000258619	processed_pseudogene	1.02971	-2.85286	0.639707	-4.45964	8.20956e-06	2.72867e-05
AC005230.1	ENSG00000258930	transcribed_processed_pseudogene	2.09866	-2.85364	0.450088	-6.34019	2.29487e-10	1.5774e-09
RN7SL173P	ENSG00000243373	misc_RNA	1.25274	-2.85449	0.459917	-6.20653	5.41675e-10	3.50187e-09
RNU6-674P	ENSG00000200701	snRNA	1.22869	-2.85449	0.465906	-6.12675	8.96936e-10	5.61829e-09
MUC5AC	ENSG00000215182	protein_coding	9281.21	-2.85449	0.281853	-10.1276	4.1678e-24	2.36115e-22
ITPKB-AS1	ENSG00000228548	lncRNA	2.13276	-2.85612	0.332374	-8.59312	8.46426e-18	1.81759e-16
AC090802.1	ENSG00000253526	lncRNA	1.6046	-2.85652	0.617339	-4.62715	3.70725e-06	1.30177e-05
RNY1P15	ENSG00000222351	misc_RNA	1.26555	-2.85704	0.482714	-5.91872	3.24466e-09	1.86285e-08
FAM204CP	ENSG00000230902	processed_pseudogene	1.36862	-2.85725	0.513312	-5.56629	2.60213e-08	1.29879e-07
RNU4-51P	ENSG00000201076	snRNA	2.33315	-2.85738	0.339921	-8.40601	4.24209e-17	8.07249e-16
AC004865.1	ENSG00000236274	processed_pseudogene	3.61217	-2.85789	0.369041	-7.74408	9.62736e-15	1.28226e-13
AC104462.2	ENSG00000238224	lncRNA	1.50401	-2.85926	0.35517	-8.05041	8.25144e-16	1.2953e-14
OR52H2P	ENSG00000248553	unitary_pseudogene	1.21447	-2.85981	0.59053	-4.84278	1.28034e-06	4.84262e-06
AC090571.1	ENSG00000238966	snoRNA	2.4609	-2.86004	0.418874	-6.82791	8.61578e-12	7.31083e-11
NUDT19P4	ENSG00000270900	processed_pseudogene	1.159	-2.8603	0.654721	-4.36874	1.24965e-05	4.03181e-05
AL512604.1	ENSG00000228292	processed_pseudogene	2.28336	-2.86082	0.352831	-8.10818	5.13842e-16	8.33088e-15
MTND1P36	ENSG00000253245	processed_pseudogene	1.08268	-2.86168	0.51244	-5.58442	2.34487e-08	1.17872e-07
RNU4-54P	ENSG00000252237	snRNA	1.06292	-2.8617	1.13561	-2.51997	0.0117366	0.0218198
PTP4A1P3	ENSG00000226254	processed_pseudogene	1.09648	-2.86211	0.713579	-4.01093	6.0481e-05	0.000173195
DUXAP7	ENSG00000232136	processed_pseudogene	2.02809	-2.86579	0.337692	-8.4864	2.13129e-17	4.27142e-16
Y_RNA	ENSG00000252250	misc_RNA	1.69849	-2.86678	0.398424	-7.1953	6.2323e-13	6.30776e-12
AC016065.2	ENSG00000253550	processed_pseudogene	2.59858	-2.867	0.304738	-9.40809	5.0521e-21	1.7826e-19
AL358075.3	ENSG00000233114	processed_pseudogene	1.28911	-2.86966	0.401398	-7.14917	8.73031e-13	8.61065e-12
RNU6-60P	ENSG00000201662	snRNA	1.4412	-2.87014	0.598177	-4.79814	1.60148e-06	5.944e-06
MCTP1-AS1	ENSG00000249545	lncRNA	0.930685	-2.87052	0.95929	-2.99234	0.00276848	0.00585004
RN7SL683P	ENSG00000242330	misc_RNA	2.52636	-2.87074	0.63748	-4.50327	6.69157e-06	2.25719e-05
AL590704.1	ENSG00000219409	processed_pseudogene	1.8816	-2.87168	0.474388	-6.05344	1.41786e-09	8.60818e-09
Y_RNA	ENSG00000207092	misc_RNA	1.40879	-2.87209	0.483345	-5.94211	2.81378e-09	1.63063e-08
AC115621.1	ENSG00000270387	processed_pseudogene	2.33042	-2.87214	0.386864	-7.42416	1.13502e-13	1.28309e-12
Y_RNA	ENSG00000200397	misc_RNA	2.47408	-2.87219	0.277707	-10.3425	4.52525e-25	2.94651e-23
AC055733.1	ENSG00000249098	processed_pseudogene	1.80904	-2.8734	0.482131	-5.95979	2.52561e-09	1.474e-08
MIR3679	ENSG00000263813	miRNA	1.00438	-2.8742	0.526554	-5.45852	4.80132e-08	2.30115e-07
NDUFA3P2	ENSG00000254856	processed_pseudogene	2.29971	-2.87449	0.339298	-8.47187	2.41483e-17	4.79858e-16
AC004009.1	ENSG00000224322	lncRNA	0.779381	-2.87575	0.770114	-3.73419	0.000188321	0.000494713
DKFZP434H168	ENSG00000261439	lncRNA	0.912352	-2.87595	0.623681	-4.61125	4.00262e-06	1.39688e-05
RNU6-198P	ENSG00000206985	snRNA	1.08023	-2.87639	0.554685	-5.18563	2.15283e-07	9.2952e-07
AC090373.1	ENSG00000279354	TEC	0.920988	-2.87738	0.635982	-4.52431	6.05942e-06	2.05611e-05
RNU6-272P	ENSG00000222960	snRNA	0.973195	-2.87778	0.658701	-4.36887	1.2489e-05	4.03023e-05
Y_RNA	ENSG00000238713	misc_RNA	2.91467	-2.878	0.283993	-10.1341	3.90089e-24	2.22286e-22
RN7SL362P	ENSG00000242707	misc_RNA	1.03577	-2.87816	0.851841	-3.37875	0.000728151	0.00171489
AC007954.1	ENSG00000258510	processed_pseudogene	1.81914	-2.8794	0.34789	-8.27674	1.26594e-16	2.24119e-15
AC012443.1	ENSG00000270776	processed_pseudogene	1.03293	-2.88312	0.635222	-4.53877	5.65844e-06	1.92948e-05
AP002439.1	ENSG00000267393	lncRNA	1.15298	-2.88471	0.66647	-4.32835	1.50232e-05	4.77801e-05
CR545473.1	ENSG00000248155	unprocessed_pseudogene	1.59896	-2.88571	0.387098	-7.45471	9.00645e-14	1.03524e-12
U7	ENSG00000272215	snRNA	1.38929	-2.8863	0.681482	-4.23534	2.2821e-05	7.04348e-05
Y_RNA	ENSG00000207086	misc_RNA	1.42767	-2.88896	0.454409	-6.35762	2.04909e-10	1.42098e-09
RBM22P4	ENSG00000277769	processed_pseudogene	1.59147	-2.88904	0.621864	-4.64579	3.38785e-06	1.19775e-05
AC096861.1	ENSG00000275348	processed_pseudogene	1.13116	-2.88957	0.475646	-6.07504	1.23957e-09	7.60779e-09
RNU6-1284P	ENSG00000200571	snRNA	0.9848	-2.89002	0.702869	-4.11175	3.92673e-05	0.000116195
AC004491.1	ENSG00000279996	TEC	4.29901	-2.89064	0.291354	-9.92141	3.35981e-23	1.68074e-21
SNORA84	ENSG00000239183	snoRNA	5.73948	-2.89083	0.449008	-6.43825	1.20857e-10	8.66195e-10
NAALADL2-AS1	ENSG00000225552	lncRNA	1.14332	-2.89153	0.770225	-3.75413	0.000173943	0.000459713
RN7SKP184	ENSG00000199218	misc_RNA	1.23366	-2.89209	0.671835	-4.30476	1.67168e-05	5.27403e-05
MIR4762	ENSG00000264160	miRNA	1.28001	-2.8924	0.516221	-5.60303	2.10636e-08	1.0663e-07
MIR576	ENSG00000207988	miRNA	1.36845	-2.89608	0.449728	-6.43963	1.19766e-10	8.59206e-10
AL136320.1	ENSG00000230322	lncRNA	3.19155	-2.89767	0.323044	-8.96989	2.96819e-19	7.9904e-18
RN7SKP50	ENSG00000201564	misc_RNA	1.83197	-2.89767	0.42136	-6.87694	6.11531e-12	5.30654e-11
AC097639.2	ENSG00000270377	processed_pseudogene	1.87617	-2.8977	0.572754	-5.05923	4.20947e-07	1.72665e-06
CHN2-AS1	ENSG00000235669	lncRNA	2.42565	-2.89888	0.3912	-7.41021	1.26101e-13	1.41687e-12
AP002490.2	ENSG00000255296	processed_pseudogene	1.95038	-2.89993	0.354703	-8.17567	2.94237e-16	4.96032e-15
AL356057.1	ENSG00000217488	transcribed_processed_pseudogene	3.47299	-2.90087	0.502685	-5.77074	7.89231e-09	4.26939e-08
GC	ENSG00000145321	protein_coding	11.968	-2.9015	0.453912	-6.3922	1.63515e-10	1.15042e-09
AC109597.1	ENSG00000260378	lncRNA	1.89214	-2.90173	0.4383	-6.62042	3.58178e-11	2.77894e-10
CHCHD4P5	ENSG00000225222	processed_pseudogene	2.90157	-2.9022	0.544734	-5.32774	9.944e-08	4.53615e-07
AC013564.1	ENSG00000274995	lncRNA	1.25629	-2.90678	0.407199	-7.13846	9.43814e-13	9.27177e-12
AC144521.1	ENSG00000272477	lncRNA	2.00495	-2.91094	0.666922	-4.36474	1.27272e-05	4.10087e-05
AL138880.1	ENSG00000219384	processed_pseudogene	1.58731	-2.9116	0.448552	-6.49112	8.52029e-11	6.25271e-10
RNU6-396P	ENSG00000202239	snRNA	0.853684	-2.91175	0.696839	-4.17851	2.93428e-05	8.88434e-05
AC114401.1	ENSG00000241884	lncRNA	1.595	-2.91209	0.379655	-7.67034	1.7154e-14	2.20083e-13
HNRNPMP1	ENSG00000259335	processed_pseudogene	3.83267	-2.91313	0.285109	-10.2176	1.65378e-24	9.91196e-23
BX284613.1	ENSG00000226552	processed_pseudogene	1.21807	-2.91554	0.400347	-7.28255	3.27568e-13	3.45531e-12
RNU6-268P	ENSG00000201044	snRNA	1.27925	-2.91723	0.463153	-6.29863	3.00296e-10	2.02836e-09
SNORA79	ENSG00000221303	snoRNA	1.25186	-2.91753	0.498744	-5.84976	4.9227e-09	2.75374e-08
RNU7-70P	ENSG00000252750	snRNA	1.20625	-2.91767	0.621478	-4.69472	2.66967e-06	9.59862e-06
RPL17P17	ENSG00000223409	processed_pseudogene	1.80543	-2.91832	0.50089	-5.82626	5.66817e-09	3.13955e-08
AL606534.2	ENSG00000232085	lncRNA	1.59368	-2.9187	0.628287	-4.64549	3.39273e-06	1.19918e-05
AC010480.1	ENSG00000279883	TEC	2.82351	-2.919	0.383815	-7.60521	2.84435e-14	3.53138e-13
AC108102.1	ENSG00000272406	lncRNA	3.43089	-2.91991	0.326414	-8.94542	3.70539e-19	9.86742e-18
AC011092.2	ENSG00000255476	lncRNA	1.50833	-2.92019	0.416553	-7.01036	2.37704e-12	2.20004e-11
AL360182.1	ENSG00000214067	processed_pseudogene	1.92466	-2.92069	0.417948	-6.98816	2.78521e-12	2.54727e-11
RNU6-859P	ENSG00000199598	snRNA	0.939808	-2.92367	0.548926	-5.32617	1.00305e-07	4.57329e-07
MIR548U	ENSG00000212017	miRNA	0.731873	-2.92431	1.1503	-2.54221	0.0110155	0.0205919
AC022960.3	ENSG00000276486	processed_pseudogene	1.57806	-2.92493	0.516349	-5.66463	1.47339e-08	7.63511e-08
CNOT10-AS1	ENSG00000251224	lncRNA	2.36541	-2.92621	0.324318	-9.02267	1.83567e-19	5.11502e-18
RPL6P12	ENSG00000214671	processed_pseudogene	1.9852	-2.92663	0.34921	-8.38072	5.26032e-17	9.86243e-16
AL513188.1	ENSG00000233848	lncRNA	2.1289	-2.92698	0.415864	-7.03832	1.94573e-12	1.82362e-11
AL356776.1	ENSG00000217512	processed_pseudogene	2.51257	-2.92835	0.397141	-7.37358	1.661e-13	1.83295e-12
SLIT2-IT1	ENSG00000248228	lncRNA	2.57509	-2.92903	0.410922	-7.12795	1.01877e-12	9.95533e-12
SNORA74A	ENSG00000200959	snoRNA	7.65616	-2.92981	0.439004	-6.67376	2.49333e-11	1.98254e-10
NDUFAF4P4	ENSG00000231378	processed_pseudogene	2.12564	-2.93158	0.397164	-7.38128	1.56779e-13	1.74002e-12
AC058823.1	ENSG00000242318	processed_pseudogene	1.34957	-2.93219	0.484532	-6.05158	1.43429e-09	8.70321e-09
AP000753.3	ENSG00000271100	processed_pseudogene	1.38201	-2.93622	0.432516	-6.78869	1.13154e-11	9.47145e-11
AC090018.1	ENSG00000227433	processed_pseudogene	1.59783	-2.93686	0.48835	-6.01385	1.81168e-09	1.08248e-08
AL022329.2	ENSG00000237387	lncRNA	2.50665	-2.93714	0.371463	-7.90695	2.63765e-15	3.82351e-14
RPS13P4	ENSG00000238111	processed_pseudogene	1.61925	-2.93724	0.417595	-7.03369	2.01136e-12	1.88076e-11
RNU6-957P	ENSG00000200522	snRNA	0.945546	-2.93895	0.704852	-4.1696	3.05131e-05	9.21611e-05
AC090213.1	ENSG00000267061	lncRNA	1.11402	-2.93902	0.836558	-3.51323	0.000442699	0.00108436
HMGB1P51	ENSG00000270986	processed_pseudogene	3.04054	-2.93906	0.345047	-8.51784	1.62556e-17	3.3453e-16
SCARNA13	ENSG00000252481	scaRNA	59.4673	-2.93922	0.17324	-16.9661	1.46241e-64	5.41968e-61
AL121978.1	ENSG00000220446	processed_pseudogene	1.07463	-2.94009	0.657502	-4.4716	7.76365e-06	2.58948e-05
PRICKLE2-AS2	ENSG00000241101	lncRNA	2.46274	-2.94273	0.305976	-9.61754	6.7426e-22	2.73094e-20
MIR1262	ENSG00000221203	miRNA	1.21076	-2.94327	0.494314	-5.95425	2.61273e-09	1.52046e-08
AC090220.1	ENSG00000266965	lncRNA	2.95952	-2.9445	0.410999	-7.16424	7.82204e-13	7.78562e-12
RN7SL141P	ENSG00000243398	misc_RNA	2.968	-2.94706	0.427897	-6.88729	5.68638e-12	4.96379e-11
AL357793.2	ENSG00000237011	lncRNA	1.3858	-2.94904	0.727437	-4.05401	5.03463e-05	0.000146168
OR7A19P	ENSG00000272963	unprocessed_pseudogene	2.57349	-2.94956	0.557794	-5.28789	1.23735e-07	5.55777e-07
AP000897.2	ENSG00000266767	lncRNA	2.86054	-2.95074	0.396697	-7.43828	1.02004e-13	1.16196e-12
AL136146.1	ENSG00000254672	processed_pseudogene	1.31704	-2.95168	0.527035	-5.60054	2.13689e-08	1.07929e-07
AC067817.1	ENSG00000253586	lncRNA	1.72754	-2.9548	0.421408	-7.01173	2.35387e-12	2.18131e-11
AL662889.1	ENSG00000232184	lncRNA	1.35841	-2.95714	0.58507	-5.05433	4.31899e-07	1.76782e-06
AC018442.2	ENSG00000253539	lncRNA	2.42809	-2.95847	0.434329	-6.8116	9.65197e-12	8.14347e-11
MTCO3P19	ENSG00000224471	processed_pseudogene	0.966487	-2.9585	0.894981	-3.30565	0.000947549	0.00218192
MTCO3P15	ENSG00000254895	processed_pseudogene	0.98122	-2.96317	0.72039	-4.11329	3.90057e-05	0.000115482
AL139193.2	ENSG00000258716	lncRNA	1.02551	-2.96341	0.799732	-3.7055	0.000210974	0.00054897
MTATP6P19	ENSG00000228316	processed_pseudogene	1.52731	-2.96418	0.422989	-7.0077	2.42262e-12	2.23803e-11
AC016542.2	ENSG00000279502	TEC	4.46773	-2.96444	0.3166	-9.36336	7.72397e-21	2.65456e-19
GSTM3P2	ENSG00000226878	processed_pseudogene	1.97561	-2.96467	0.339022	-8.74476	2.23492e-18	5.28677e-17
OLFM4	ENSG00000102837	protein_coding	158.937	-2.96475	0.268364	-11.0475	2.25468e-28	2.29451e-26
GKN1	ENSG00000169605	protein_coding	2.60394	-2.96585	0.456761	-6.49322	8.40185e-11	6.16884e-10
RN7SKP151	ENSG00000222162	misc_RNA	1.2986	-2.96672	0.426871	-6.94994	3.65451e-12	3.28397e-11
AC093423.1	ENSG00000226394	processed_pseudogene	2.02285	-2.9678	0.472295	-6.28379	3.30413e-10	2.21397e-09
AC010886.1	ENSG00000224414	processed_pseudogene	2.61975	-2.97197	0.361284	-8.22612	1.93378e-16	3.35279e-15
RNU1-109P	ENSG00000206687	snRNA	1.10044	-2.97229	0.678202	-4.3826	1.17269e-05	3.80227e-05
PLCB1-IT1	ENSG00000225479	lncRNA	1.22123	-2.97327	0.875421	-3.39639	0.000682806	0.00161701
SOX5-AS1	ENSG00000256120	lncRNA	1.36085	-2.97553	0.654953	-4.54312	5.54286e-06	1.89151e-05
TMEM108-AS1	ENSG00000251011	lncRNA	4.01691	-2.97624	0.316752	-9.39614	5.66029e-21	1.98208e-19
AC079416.4	ENSG00000280227	TEC	2.40787	-2.97628	0.418763	-7.10732	1.18319e-12	1.14513e-11
AL353706.1	ENSG00000227072	processed_pseudogene	1.17789	-2.97881	0.471179	-6.32203	2.58149e-10	1.75972e-09
RNU6-987P	ENSG00000207490	snRNA	0.974624	-2.98043	0.585291	-5.09222	3.53888e-07	1.47044e-06
AC060773.1	ENSG00000230459	processed_pseudogene	1.59463	-2.98064	0.383688	-7.7684	7.9486e-15	1.07346e-13
ASTN2-AS1	ENSG00000229105	lncRNA	2.17243	-2.98174	0.367596	-8.11147	5.00104e-16	8.11999e-15
RPL23AP17	ENSG00000215893	processed_pseudogene	2.01979	-2.98209	0.366795	-8.13013	4.28829e-16	7.01652e-15
RNU6-1062P	ENSG00000206635	snRNA	1.53436	-2.98263	0.485157	-6.14776	7.85866e-10	4.96365e-09
AL160281.1	ENSG00000270575	processed_pseudogene	2.47055	-2.98516	0.401359	-7.43763	1.0251e-13	1.16714e-12
KARS1P1	ENSG00000229696	processed_pseudogene	1.84448	-2.98663	0.443981	-6.72693	1.73279e-11	1.40985e-10
AC021237.1	ENSG00000250267	lncRNA	2.84927	-2.98889	0.430426	-6.94402	3.81104e-12	3.41221e-11
RPS15AP13	ENSG00000228568	processed_pseudogene	1.46667	-2.98906	0.487591	-6.13025	8.77386e-10	5.50651e-09
AL162584.1	ENSG00000227068	lncRNA	3.69931	-2.99046	0.35001	-8.54393	1.29729e-17	2.70479e-16
RNA5SP141	ENSG00000201413	rRNA_pseudogene	0.782867	-2.99099	1.12692	-2.65413	0.00795136	0.0153192
AC008534.1	ENSG00000249175	lncRNA	3.14724	-2.99227	0.363108	-8.24073	1.71164e-16	2.98979e-15
AC011389.3	ENSG00000279752	TEC	0.973277	-2.993	0.639231	-4.68219	2.83832e-06	1.01541e-05
RPL35AP23	ENSG00000264217	processed_pseudogene	1.64138	-2.99331	0.408458	-7.32833	2.33045e-13	2.5192e-12
AL512593.1	ENSG00000231562	processed_pseudogene	1.65864	-2.99358	0.451918	-6.62416	3.49232e-11	2.71379e-10
MIR548E	ENSG00000221214	miRNA	1.28532	-2.99536	0.675239	-4.43601	9.16428e-06	3.0225e-05
AP003168.2	ENSG00000255081	lncRNA	1.89621	-2.99555	0.408838	-7.32699	2.35381e-13	2.5426e-12
PRKCA-AS1	ENSG00000264630	lncRNA	5.43107	-2.99953	0.286511	-10.4692	1.19711e-25	8.37074e-24
ENO1P3	ENSG00000243986	processed_pseudogene	2.03151	-2.99961	0.484245	-6.19441	5.85028e-10	3.76136e-09
AC018607.1	ENSG00000254325	lncRNA	4.34861	-3.00054	0.316427	-9.48255	2.48142e-21	9.29685e-20
ALG9-IT1	ENSG00000254450	lncRNA	1.58379	-3.0022	0.430873	-6.96772	3.22124e-12	2.91583e-11
AC007533.1	ENSG00000261369	lncRNA	4.68051	-3.00669	0.316909	-9.48754	2.36561e-21	8.89293e-20
MTND1P21	ENSG00000235940	processed_pseudogene	1.278	-3.00722	0.62017	-4.84903	1.24064e-06	4.70243e-06
Y_RNA	ENSG00000207368	misc_RNA	1.34329	-3.00777	0.617615	-4.86997	1.11614e-06	4.26287e-06
AC007014.1	ENSG00000262020	lncRNA	2.9486	-3.00854	0.278398	-10.8066	3.20186e-27	2.81409e-25
AC122714.1	ENSG00000250749	processed_pseudogene	1.29707	-3.00864	0.436902	-6.8863	5.72623e-12	4.99523e-11
AC091286.1	ENSG00000237606	processed_pseudogene	3.12521	-3.00864	0.290868	-10.3437	4.47143e-25	2.92002e-23
RNVU1-33	ENSG00000200597	snRNA	1.54866	-3.00877	0.626126	-4.80538	1.54454e-06	5.74946e-06
RNU4-40P	ENSG00000201221	snRNA	1.81557	-3.00877	0.398009	-7.55956	4.04437e-14	4.89685e-13
SNORD115	ENSG00000212411	snoRNA	1.55303	-3.00887	0.546849	-5.50219	3.75102e-08	1.82591e-07
AC078955.1	ENSG00000258026	lncRNA	1.1052	-3.00889	0.573679	-5.2449	1.56369e-07	6.9174e-07
AC110994.1	ENSG00000201554	misc_RNA	1.00921	-3.0091	0.945573	-3.18231	0.00146107	0.00325649
UST-AS1	ENSG00000227660	lncRNA	1.51986	-3.00924	0.423341	-7.10832	1.17467e-12	1.13788e-11
RPL27P8	ENSG00000237041	processed_pseudogene	1.43429	-3.01075	0.431289	-6.98082	2.93469e-12	2.67332e-11
Y_RNA	ENSG00000201178	misc_RNA	1.25114	-3.01138	0.45087	-6.67906	2.40486e-11	1.91631e-10
AL450344.1	ENSG00000224029	lncRNA	1.96552	-3.01141	0.43681	-6.89409	5.42089e-12	4.74376e-11
FGF14-AS1	ENSG00000234445	lncRNA	1.06704	-3.01375	0.546314	-5.51652	3.45782e-08	1.69432e-07
U3	ENSG00000238297	snoRNA	1.72036	-3.01451	0.491924	-6.12799	8.89962e-10	5.57835e-09
RN7SKP189	ENSG00000201912	misc_RNA	1.52508	-3.01539	1.31984	-2.28467	0.0223323	0.0389979
AC004467.1	ENSG00000275194	unprocessed_pseudogene	1.0057	-3.0155	0.808531	-3.7296	0.000191783	0.000503006
IFNK	ENSG00000147896	protein_coding	3.06965	-3.01552	0.42466	-7.10103	1.23835e-12	1.19436e-11
AP000915.2	ENSG00000265477	lncRNA	1.25629	-3.01666	0.663425	-4.5471	5.439e-06	1.85878e-05
AL355297.1	ENSG00000270487	lncRNA	1.35653	-3.02045	0.465253	-6.49207	8.46669e-11	6.2144e-10
RPAP2P1	ENSG00000270874	processed_pseudogene	3.24953	-3.02124	0.372414	-8.11259	4.95501e-16	8.04819e-15
RNA5-8SN1	ENSG00000278189	rRNA	0.783431	-3.02381	1.26054	-2.39883	0.0164476	0.0296196
AL034349.1	ENSG00000224733	lncRNA	2.94198	-3.02613	0.445214	-6.79703	1.06797e-11	8.96299e-11
AP003035.1	ENSG00000254897	processed_pseudogene	1.20396	-3.02628	0.521347	-5.80474	6.44641e-09	3.53495e-08
MIR5739	ENSG00000276162	miRNA	1.23304	-3.02763	0.680768	-4.44737	8.6926e-06	2.87803e-05
AL137779.3	ENSG00000259161	processed_pseudogene	2.68709	-3.02774	0.429705	-7.04609	1.84011e-12	1.73119e-11
AC012291.2	ENSG00000259415	lncRNA	1.26959	-3.02783	0.460949	-6.56869	5.07589e-11	3.8501e-10
H3P33	ENSG00000255492	processed_pseudogene	2.16405	-3.02898	0.432774	-6.99899	2.57812e-12	2.37183e-11
NANOGP2	ENSG00000228670	processed_pseudogene	2.8795	-3.03083	0.363356	-8.3412	7.35403e-17	1.35088e-15
AP000844.1	ENSG00000224700	lncRNA	1.23226	-3.03125	0.62662	-4.83746	1.3151e-06	4.96182e-06
PALLD-AS1	ENSG00000249623	lncRNA	1.83133	-3.03207	0.511523	-5.92753	3.07531e-09	1.77295e-08
NAALADL2-AS3	ENSG00000230292	lncRNA	2.71401	-3.03252	0.463564	-6.54175	6.08032e-11	4.56301e-10
AC130454.1	ENSG00000279276	TEC	0.971004	-3.03266	0.909312	-3.33511	0.000852651	0.00198249
RN7SL308P	ENSG00000243951	misc_RNA	1.2719	-3.03397	0.624316	-4.85967	1.17583e-06	4.47396e-06
MIR591	ENSG00000208025	miRNA	1.01665	-3.03488	0.749854	-4.0473	5.18124e-05	0.000150209
AP001642.1	ENSG00000279733	TEC	1.42075	-3.03632	0.696196	-4.3613	1.29289e-05	4.16015e-05
LZTS1-AS1	ENSG00000253733	lncRNA	1.16235	-3.03672	0.65541	-4.63331	3.59861e-06	1.26662e-05
RN7SL801P	ENSG00000241230	misc_RNA	2.42145	-3.03729	0.560912	-5.41492	6.13175e-08	2.89635e-07
RNU7-119P	ENSG00000239119	snRNA	0.992688	-3.03732	1.32979	-2.28406	0.0223679	0.0390495
MTND2P26	ENSG00000254565	processed_pseudogene	1.21831	-3.03934	0.497487	-6.10939	1.00012e-09	6.2119e-09
RNU6-711P	ENSG00000253064	snRNA	1.4999	-3.03986	0.445318	-6.82626	8.71586e-12	7.39294e-11
AC002366.1	ENSG00000232392	processed_pseudogene	1.20126	-3.04003	0.535697	-5.67491	1.38759e-08	7.22927e-08
MIR4296	ENSG00000264572	miRNA	1.26889	-3.04057	0.406653	-7.47707	7.59996e-14	8.82238e-13
Y_RNA	ENSG00000200685	misc_RNA	0.96439	-3.04077	0.735626	-4.13358	3.57154e-05	0.000106506
RNU5D-1	ENSG00000200169	snRNA	2.83724	-3.04166	0.436776	-6.96389	3.31014e-12	2.99083e-11
Y_RNA	ENSG00000200855	misc_RNA	1.28118	-3.04332	0.461679	-6.59184	4.34396e-11	3.32847e-10
VTRNA1-1	ENSG00000199990	misc_RNA	2.13488	-3.04774	0.429726	-7.09229	1.3191e-12	1.2662e-11
AC096921.1	ENSG00000224618	processed_pseudogene	2.86807	-3.04893	0.347831	-8.76554	1.85887e-18	4.45407e-17
AC007599.1	ENSG00000259866	processed_pseudogene	2.22427	-3.04894	0.575312	-5.29964	1.16034e-07	5.23193e-07
RNU6-1176P	ENSG00000212257	snRNA	2.16892	-3.04971	0.458039	-6.65819	2.77225e-11	2.19178e-10
RNU4-9P	ENSG00000201821	snRNA	1.17922	-3.05104	0.589888	-5.17223	2.31318e-07	9.92961e-07
MTND5P2	ENSG00000229622	processed_pseudogene	2.67983	-3.05388	0.316604	-9.64576	5.12301e-22	2.12926e-20
AC135626.1	ENSG00000258632	processed_pseudogene	2.01857	-3.05439	0.50397	-6.06066	1.35568e-09	8.25777e-09
RN7SKP25	ENSG00000199319	misc_RNA	1.36935	-3.05465	0.45452	-6.72062	1.80949e-11	1.46846e-10
AC007431.2	ENSG00000266100	lncRNA	2.08033	-3.05482	0.412577	-7.40423	1.31918e-13	1.47961e-12
Y_RNA	ENSG00000252975	misc_RNA	2.76816	-3.05492	0.429984	-7.10474	1.20553e-12	1.16524e-11
RNU6ATAC23P	ENSG00000221375	snRNA	0.963815	-3.05602	1.1189	-2.73127	0.00630909	0.0124056
AL390774.2	ENSG00000230826	lncRNA	2.85244	-3.05937	0.392672	-7.79115	6.64029e-15	9.05294e-14
MIR4796	ENSG00000264623	miRNA	1.0027	-3.06186	0.848336	-3.60925	0.000307085	0.000775475
EGLN3P1	ENSG00000256134	processed_pseudogene	3.47922	-3.06358	0.291548	-10.508	7.93807e-26	5.73088e-24
AL049820.1	ENSG00000233044	lncRNA	2.18249	-3.0645	0.406079	-7.54657	4.46876e-14	5.37556e-13
AC091925.2	ENSG00000279679	TEC	3.07679	-3.06471	0.348452	-8.7952	1.42798e-18	3.47783e-17
AC105114.1	ENSG00000279439	TEC	1.36505	-3.07221	0.527184	-5.82759	5.62325e-09	3.11778e-08
DOCK9-AS1	ENSG00000229918	lncRNA	2.32463	-3.07449	0.468936	-6.5563	5.51583e-11	4.16327e-10
AP000962.2	ENSG00000280432	TEC	2.3982	-3.07513	0.360083	-8.54005	1.34161e-17	2.79195e-16
STX18-IT1	ENSG00000248221	lncRNA	2.43062	-3.0759	0.381983	-8.05247	8.11382e-16	1.27595e-14
RN7SKP299	ENSG00000271765	misc_RNA	1.59456	-3.07763	0.43668	-7.04779	1.81777e-12	1.71198e-11
EEF1B2P8	ENSG00000230497	processed_pseudogene	1.83831	-3.0784	0.48298	-6.37376	1.84449e-10	1.28793e-09
AC116096.1	ENSG00000261734	lncRNA	2.52008	-3.07947	0.359795	-8.55896	1.13891e-17	2.39932e-16
RBMS3-AS1	ENSG00000235593	lncRNA	1.56897	-3.0806	0.443828	-6.94099	3.89371e-12	3.48132e-11
TPMTP2	ENSG00000234562	processed_pseudogene	2.93832	-3.08277	0.383268	-8.04338	8.73962e-16	1.36519e-14
RPS27AP8	ENSG00000237483	processed_pseudogene	3.40366	-3.08433	0.358866	-8.59466	8.35127e-18	1.79593e-16
AL391863.2	ENSG00000234361	lncRNA	2.81695	-3.08445	0.505426	-6.10268	1.04308e-09	6.45798e-09
PDHA1P1	ENSG00000270772	processed_pseudogene	3.81558	-3.08536	0.429541	-7.18291	6.8242e-13	6.87397e-12
AP005059.2	ENSG00000265316	lncRNA	1.25568	-3.08645	0.597457	-5.16597	2.39192e-07	1.0242e-06
MRPS6P2	ENSG00000237130	processed_pseudogene	1.41634	-3.09185	0.54447	-5.67865	1.35759e-08	7.08586e-08
AC138832.1	ENSG00000253536	processed_pseudogene	2.47339	-3.0926	0.379197	-8.15567	3.47247e-16	5.76007e-15
AC092608.2	ENSG00000278880	TEC	1.65849	-3.09372	0.829232	-3.73082	0.000190858	0.000500845
AC007496.1	ENSG00000260194	lncRNA	6.20305	-3.0972	0.283438	-10.9273	8.53848e-28	8.1661e-26
CCNJP2	ENSG00000223896	processed_pseudogene	2.47117	-3.09747	0.48022	-6.45009	1.11782e-10	8.05051e-10
AC108729.1	ENSG00000242152	processed_pseudogene	1.42361	-3.09751	0.589063	-5.25836	1.45345e-07	6.46248e-07
AC098869.1	ENSG00000242197	processed_pseudogene	2.46387	-3.09813	0.406648	-7.6187	2.56249e-14	3.2038e-13
AL365338.1	ENSG00000225078	processed_pseudogene	2.8983	-3.09845	0.372212	-8.32443	8.47355e-17	1.54568e-15
AL450226.1	ENSG00000225084	lncRNA	2.70758	-3.1042	0.388231	-7.99575	1.28785e-15	1.95874e-14
TIMM9P1	ENSG00000236900	processed_pseudogene	2.69462	-3.10607	0.463024	-6.70822	1.97009e-11	1.59211e-10
YBX1P3	ENSG00000240002	processed_pseudogene	1.92139	-3.10654	0.515416	-6.02725	1.66771e-09	1.00211e-08
RNU6-1188P	ENSG00000200665	snRNA	1.30869	-3.10777	0.698592	-4.44862	8.64251e-06	2.86273e-05
AC017099.1	ENSG00000235833	processed_pseudogene	1.463	-3.11045	0.618578	-5.02839	4.94617e-07	2.00662e-06
PDE4B-AS1	ENSG00000227466	lncRNA	1.13279	-3.11254	0.699739	-4.44814	8.66153e-06	2.86817e-05
Y_RNA	ENSG00000206756	misc_RNA	1.72925	-3.11284	0.435136	-7.15372	8.446e-13	8.34875e-12
AL356785.1	ENSG00000252719	snoRNA	1.14612	-3.11743	0.696503	-4.47583	7.61138e-06	2.54334e-05
RNU7-124P	ENSG00000251745	snRNA	1.50758	-3.11894	0.571462	-5.45783	4.81986e-08	2.30905e-07
MIR644A	ENSG00000207997	miRNA	2.47447	-3.12287	0.393713	-7.93185	2.159e-15	3.17128e-14
CASR	ENSG00000036828	protein_coding	56.7459	-3.12532	0.248168	-12.5935	2.29162e-36	7.43892e-34
RPL26P9	ENSG00000226128	processed_pseudogene	1.81141	-3.12577	0.458584	-6.81613	9.35279e-12	7.90454e-11
MTND6P32	ENSG00000227649	processed_pseudogene	0.990085	-3.12599	1.21449	-2.57391	0.0100555	0.0189463
AC069079.1	ENSG00000235279	lncRNA	1.80993	-3.12809	0.786185	-3.97882	6.92591e-05	0.000196009
AL357054.1	ENSG00000219712	processed_pseudogene	2.41009	-3.12945	0.424177	-7.3777	1.61049e-13	1.78341e-12
AC008498.2	ENSG00000279985	TEC	2.23836	-3.13246	0.394178	-7.94682	1.91355e-15	2.83099e-14
Y_RNA	ENSG00000206784	misc_RNA	1.14688	-3.13411	0.569079	-5.50734	3.64287e-08	1.77696e-07
AC027279.4	ENSG00000280190	TEC	2.78391	-3.13491	0.378625	-8.27972	1.23466e-16	2.19018e-15
AL024474.2	ENSG00000225311	lncRNA	3.24095	-3.13525	0.31737	-9.87885	5.14193e-23	2.49915e-21
AC008277.2	ENSG00000270893	processed_pseudogene	3.33525	-3.13554	0.423091	-7.41102	1.25327e-13	1.40924e-12
AC027335.1	ENSG00000250001	lncRNA	1.30989	-3.13723	0.667262	-4.70165	2.58073e-06	9.29915e-06
NDUFB4P2	ENSG00000251306	processed_pseudogene	1.89755	-3.13851	0.452229	-6.94009	3.91856e-12	3.50283e-11
AL355852.1	ENSG00000226010	processed_pseudogene	1.47974	-3.13962	0.49201	-6.38122	1.75686e-10	1.23022e-09
AC026725.1	ENSG00000249713	lncRNA	2.1554	-3.14399	0.42282	-7.43577	1.03961e-13	1.18335e-12
CACNA1C-AS4	ENSG00000256025	lncRNA	1.95649	-3.14543	0.529127	-5.94456	2.77202e-09	1.60705e-08
AP006259.1	ENSG00000255097	lncRNA	3.41535	-3.14593	0.350779	-8.96842	3.008e-19	8.08777e-18
MTCO1P19	ENSG00000237300	processed_pseudogene	2.07297	-3.14657	0.416512	-7.55456	4.20294e-14	5.08192e-13
SNORA63	ENSG00000201791	snoRNA	1.27429	-3.1484	0.650724	-4.83829	1.30958e-06	4.9431e-06
LINC01878	ENSG00000234308	lncRNA	1.57718	-3.14867	0.531355	-5.92573	3.10917e-09	1.79015e-08
AL133384.1	ENSG00000229668	processed_pseudogene	1.33714	-3.15484	0.646163	-4.88242	1.04792e-06	4.02099e-06
RNU6-251P	ENSG00000200105	snRNA	1.53277	-3.15557	0.650081	-4.85412	1.20925e-06	4.59246e-06
RNA5SP104	ENSG00000222921	rRNA_pseudogene	0.917078	-3.15594	1.0586	-2.98125	0.00287073	0.0060477
RNU6-1283P	ENSG00000202184	snRNA	2.41242	-3.15728	0.439851	-7.17806	7.07077e-13	7.10143e-12
RN7SKP79	ENSG00000200243	misc_RNA	1.79801	-3.16667	0.686721	-4.61129	4.0017e-06	1.39667e-05
MUC6	ENSG00000184956	protein_coding	1271.33	-3.1678	0.264166	-11.9917	3.92669e-33	7.664e-31
AC020661.4	ENSG00000280036	lncRNA	3.23403	-3.16875	0.32591	-9.72277	2.41127e-22	1.05338e-20
SMAD1-AS2	ENSG00000250582	lncRNA	3.78548	-3.17052	0.368771	-8.59753	8.14472e-18	1.7549e-16
RNU2-61P	ENSG00000223001	snRNA	1.45853	-3.17115	1.2652	-2.50644	0.0121952	0.022593
ELMO1-AS1	ENSG00000224101	lncRNA	1.3458	-3.17185	0.612947	-5.17476	2.28207e-07	9.80372e-07
STARD13-IT1	ENSG00000230300	lncRNA	2.57208	-3.17408	0.393171	-8.07303	6.85769e-16	1.09232e-14
RNU6-122P	ENSG00000252627	snRNA	2.97596	-3.17485	0.346744	-9.15618	5.37651e-20	1.62656e-18
AC087286.1	ENSG00000259276	lncRNA	2.7383	-3.17582	0.376806	-8.42827	3.50824e-17	6.79926e-16
AL512326.1	ENSG00000201619	snoRNA	1.49352	-3.17639	0.650944	-4.87966	1.06267e-06	4.07475e-06
Y_RNA	ENSG00000202222	misc_RNA	1.76827	-3.17867	0.455647	-6.97618	3.03318e-12	2.75852e-11
Y_RNA	ENSG00000200883	misc_RNA	1.60602	-3.17918	0.546177	-5.82078	5.8574e-09	3.23269e-08
AC005160.1	ENSG00000227658	lncRNA	1.27368	-3.18005	0.794722	-4.00146	6.29519e-05	0.000179692
MTCO2P15	ENSG00000255417	processed_pseudogene	1.0415	-3.18187	0.649547	-4.8986	9.65199e-07	3.72607e-06
AC022973.1	ENSG00000200075	snoRNA	2.1663	-3.18195	0.559107	-5.69113	1.26198e-08	6.61746e-08
AC004054.1	ENSG00000248984	lncRNA	1.42795	-3.18243	0.667014	-4.77115	1.83176e-06	6.74022e-06
HNRNPA1P29	ENSG00000235784	processed_pseudogene	1.4708	-3.18297	0.585442	-5.43687	5.42232e-08	2.57933e-07
AIRN	ENSG00000268257	lncRNA	3.19097	-3.18877	0.349378	-9.12699	7.04316e-20	2.10217e-18
SUMO2P8	ENSG00000228976	processed_pseudogene	3.27106	-3.19188	0.386545	-8.25746	1.48809e-16	2.61471e-15
SUMO2P14	ENSG00000271096	processed_pseudogene	1.05955	-3.19313	0.985483	-3.24017	0.00119458	0.00270303
AP000659.1	ENSG00000274303	misc_RNA	2.80485	-3.19367	0.520616	-6.1344	8.54788e-10	5.37226e-09
RN7SKP103	ENSG00000200718	misc_RNA	1.30047	-3.19616	0.886	-3.6074	0.000309281	0.000780566
AC005972.2	ENSG00000272164	processed_pseudogene	2.06123	-3.19762	0.581477	-5.49913	3.81662e-08	1.8548e-07
MAGI1-AS1	ENSG00000240175	lncRNA	3.32254	-3.19918	0.38631	-8.28137	1.21764e-16	2.16171e-15
SNORA62	ENSG00000201157	snoRNA	1.05561	-3.19992	0.74097	-4.31856	1.57049e-05	4.97209e-05
MIR4802	ENSG00000263642	miRNA	1.9104	-3.20044	0.464763	-6.88619	5.73057e-12	4.99804e-11
RPL23AP40	ENSG00000242321	processed_pseudogene	1.59258	-3.20133	0.486755	-6.57688	4.80421e-11	3.65406e-10
AC007598.1	ENSG00000260723	lncRNA	2.12478	-3.20347	0.384884	-8.3232	8.56206e-17	1.55926e-15
RNVU1-31	ENSG00000270722	snRNA	6.88684	-3.20557	0.331255	-9.67706	3.77398e-22	1.59844e-20
RNA5SP168	ENSG00000252451	rRNA_pseudogene	1.41089	-3.20574	0.545931	-5.87205	4.30427e-09	2.42672e-08
Y_RNA	ENSG00000199366	misc_RNA	2.3221	-3.20584	0.352147	-9.10368	8.73221e-20	2.56329e-18
AC106707.2	ENSG00000243314	processed_pseudogene	1.82455	-3.20632	0.472727	-6.78261	1.18024e-11	9.85124e-11
COX6CP17	ENSG00000235141	processed_pseudogene	1.24785	-3.20883	0.738564	-4.34468	1.39476e-05	4.46212e-05
AC002542.1	ENSG00000227532	processed_pseudogene	1.50863	-3.21024	0.402962	-7.96661	1.6309e-15	2.43879e-14
AL353771.1	ENSG00000228988	lncRNA	2.94803	-3.21118	0.340457	-9.43195	4.02541e-21	1.44369e-19
RNA5SP202	ENSG00000201185	rRNA_pseudogene	1.40058	-3.21212	0.550054	-5.83964	5.23139e-09	2.91505e-08
Z99496.1	ENSG00000169075	processed_pseudogene	4.38089	-3.21339	0.33821	-9.50117	2.0755e-21	7.83544e-20
AP005131.4	ENSG00000267529	lncRNA	5.56758	-3.21366	0.283584	-11.3323	9.08057e-30	1.16378e-27
NDUFB5P2	ENSG00000214628	processed_pseudogene	1.33903	-3.21401	0.590602	-5.44192	5.27092e-08	2.51107e-07
AC007599.2	ENSG00000262038	lncRNA	2.0519	-3.21447	0.464419	-6.92147	4.46965e-12	3.96914e-11
AC114982.2	ENSG00000241991	processed_pseudogene	1.85876	-3.21689	0.404262	-7.95745	1.75624e-15	2.61477e-14
HSPA8P19	ENSG00000251614	processed_pseudogene	2.8503	-3.21849	0.368369	-8.73715	2.39062e-18	5.63412e-17
AF131215.2	ENSG00000254556	lncRNA	4.66351	-3.22092	0.296769	-10.8533	1.92356e-27	1.73168e-25
AC241520.1	ENSG00000236576	processed_pseudogene	2.42158	-3.22237	0.435277	-7.40303	1.33114e-13	1.49265e-12
LINC00710	ENSG00000229240	lncRNA	2.94705	-3.22341	0.297867	-10.8217	2.71819e-27	2.40325e-25
VPS26BP1	ENSG00000224895	processed_pseudogene	3.00923	-3.22409	0.4376	-7.36766	1.73646e-13	1.91053e-12
AC136603.1	ENSG00000280115	TEC	1.38082	-3.22462	0.729611	-4.41964	9.88657e-06	3.24316e-05
AC005695.2	ENSG00000263708	lncRNA	1.65395	-3.22801	0.447494	-7.21353	5.45201e-13	5.56999e-12
AC008592.2	ENSG00000250955	lncRNA	1.21063	-3.22814	0.65628	-4.91884	8.70603e-07	3.38795e-06
AC009509.4	ENSG00000256557	processed_pseudogene	1.26123	-3.22988	0.549924	-5.87333	4.27132e-09	2.40906e-08
MYG1P1	ENSG00000270846	processed_pseudogene	2.42068	-3.23372	0.383571	-8.43056	3.44e-17	6.67178e-16
HMGB1P23	ENSG00000253770	processed_pseudogene	1.58685	-3.23456	0.441887	-7.31988	2.4819e-13	2.66864e-12
SCARNA3	ENSG00000252906	scaRNA	3.32775	-3.23485	0.507201	-6.37785	1.79587e-10	1.25556e-09
AC006270.2	ENSG00000272383	processed_pseudogene	1.86513	-3.23745	0.572178	-5.65813	1.53033e-08	7.90625e-08
LINC02344	ENSG00000227911	lncRNA	2.29822	-3.23807	0.460056	-7.03843	1.94414e-12	1.82251e-11
AC083875.1	ENSG00000235429	processed_pseudogene	1.31401	-3.24169	0.742313	-4.36701	1.25959e-05	4.06298e-05
AC023813.2	ENSG00000260033	processed_pseudogene	3.17828	-3.24177	0.471305	-6.87829	6.0575e-12	5.25945e-11
SNORA70	ENSG00000253042	snoRNA	1.76799	-3.2453	0.583652	-5.56034	2.69252e-08	1.34164e-07
BRWD1-IT1	ENSG00000237373	lncRNA	3.17195	-3.24656	0.32986	-9.84224	7.40471e-23	3.50511e-21
AC093019.2	ENSG00000241073	lncRNA	1.51958	-3.2469	0.47053	-6.90052	5.18129e-12	4.5547e-11
RNU6-613P	ENSG00000222344	snRNA	1.16161	-3.24755	0.750177	-4.32904	1.49759e-05	4.76503e-05
AL139184.1	ENSG00000225727	transcribed_processed_pseudogene	1.24848	-3.24966	0.756842	-4.29371	1.7571e-05	5.52435e-05
PBX1-AS1	ENSG00000233693	lncRNA	2.76451	-3.2531	0.351297	-9.26024	2.03967e-20	6.61137e-19
SNORA74B	ENSG00000212402	snoRNA	14.0745	-3.25322	0.274162	-11.866	1.77716e-32	3.19974e-30
ZBTB20-AS2	ENSG00000241295	lncRNA	1.09334	-3.25351	1.00773	-3.22854	0.00124425	0.00280756
AL158832.1	ENSG00000235880	lncRNA	1.98919	-3.25389	0.498504	-6.52731	6.69599e-11	4.98801e-10
AC007601.2	ENSG00000261293	lncRNA	1.8758	-3.25452	0.382946	-8.49863	1.91845e-17	3.87806e-16
RNU6-107P	ENSG00000252452	snRNA	2.68217	-3.2565	0.36052	-9.0328	1.6734e-19	4.70414e-18
SNORA20	ENSG00000207392	snoRNA	5.87893	-3.25661	0.297805	-10.9354	7.80811e-28	7.56519e-26
SMG6-IT1	ENSG00000278941	TEC	1.62678	-3.25997	0.444919	-7.3271	2.3518e-13	2.54104e-12
AC012568.1	ENSG00000259202	lncRNA	2.17809	-3.26039	0.411001	-7.93281	2.14248e-15	3.14977e-14
BIRC6-AS1	ENSG00000230046	lncRNA	2.71307	-3.26229	0.465236	-7.01213	2.34712e-12	2.17552e-11
FP236383.5	ENSG00000281181	lncRNA	1.78182	-3.26288	0.556974	-5.85823	4.67833e-09	2.6243e-08
ETS1-AS1	ENSG00000254588	lncRNA	1.66074	-3.26821	0.451511	-7.23837	4.54093e-13	4.69856e-12
AC100852.1	ENSG00000252283	misc_RNA	1.08908	-3.26884	0.78547	-4.16163	3.15981e-05	9.51473e-05
AC090953.1	ENSG00000270739	processed_pseudogene	3.4238	-3.26884	0.335439	-9.74496	1.93861e-22	8.63001e-21
AP004289.2	ENSG00000237704	processed_pseudogene	3.28628	-3.27005	0.462113	-7.07629	1.48064e-12	1.41242e-11
RNU6-681P	ENSG00000200882	snRNA	2.54052	-3.2702	0.707324	-4.62334	3.77612e-06	1.32417e-05
RPS20P31	ENSG00000240925	processed_pseudogene	2.80044	-3.27157	0.340087	-9.61979	6.59679e-22	2.6792e-20
RN7SKP237	ENSG00000201533	misc_RNA	3.00899	-3.28055	0.333897	-9.82503	8.78513e-23	4.10391e-21
PRR13P1	ENSG00000232824	processed_pseudogene	2.46683	-3.29404	0.367115	-8.97278	2.89134e-19	7.8024e-18
SNORA37	ENSG00000207233	snoRNA	4.92338	-3.29481	0.345699	-9.53088	1.5596e-21	5.95352e-20
RNU6-769P	ENSG00000207136	snRNA	1.16749	-3.29599	0.8317	-3.96296	7.40261e-05	0.000208286
TSPYL6	ENSG00000178021	protein_coding	5.51097	-3.29751	0.283189	-11.6442	2.45639e-31	3.84651e-29
MIR606	ENSG00000207583	miRNA	1.02903	-3.2988	0.736589	-4.47849	7.51739e-06	2.5142e-05
AC020661.2	ENSG00000259463	lncRNA	2.37727	-3.30009	0.446357	-7.39338	1.43138e-13	1.599e-12
MZT1P1	ENSG00000271264	processed_pseudogene	1.57855	-3.30163	0.498025	-6.62943	3.36978e-11	2.62591e-10
MUCL3	ENSG00000168631	protein_coding	774.856	-3.30214	0.194167	-17.0067	7.32851e-65	2.96285e-61
AC009365.3	ENSG00000227197	lncRNA	3.91302	-3.3023	0.38443	-8.59013	8.68746e-18	1.86282e-16
RNU4-87P	ENSG00000200974	snRNA	1.46645	-3.3041	0.734286	-4.49974	6.80372e-06	2.29154e-05
METTL21AP1	ENSG00000229623	processed_pseudogene	2.50209	-3.30844	0.472546	-7.0013	2.53593e-12	2.33543e-11
AL356805.1	ENSG00000258380	lncRNA	3.74688	-3.30918	0.36879	-8.97307	2.88351e-19	7.78599e-18
RNU7-80P	ENSG00000238778	snRNA	1.3738	-3.31106	0.904561	-3.6604	0.000251823	0.000645964
AL589655.1	ENSG00000218521	processed_pseudogene	1.75932	-3.31591	0.697259	-4.75563	1.97828e-06	7.24516e-06
RNVU1-2A	ENSG00000278099	snRNA	3.32862	-3.31591	0.775813	-4.27411	1.91899e-05	5.99181e-05
RN7SL57P	ENSG00000242256	misc_RNA	2.11269	-3.31673	0.507437	-6.53623	6.309e-11	4.72187e-10
AC055733.3	ENSG00000251579	processed_pseudogene	1.95508	-3.31726	0.485486	-6.83287	8.32323e-12	7.0761e-11
USP12P2	ENSG00000224007	processed_pseudogene	2.85345	-3.31738	0.421301	-7.87414	3.43091e-15	4.88098e-14
CBX3P3	ENSG00000250045	processed_pseudogene	2.24086	-3.3174	0.409154	-8.10794	5.14845e-16	8.33802e-15
AL354943.1	ENSG00000262803	processed_pseudogene	3.75122	-3.31916	0.327593	-10.1319	3.98655e-24	2.26713e-22
RN7SKP158	ENSG00000222385	misc_RNA	1.54868	-3.31971	0.535221	-6.20251	5.55713e-10	3.58533e-09
MIR4729	ENSG00000263857	miRNA	1.28253	-3.32146	0.552585	-6.01077	1.84643e-09	1.10176e-08
PRB1	ENSG00000251655	protein_coding	2.75013	-3.32195	0.554413	-5.99183	2.07488e-09	1.22623e-08
RNU5E-1	ENSG00000199347	snRNA	8.52764	-3.32358	0.346385	-9.59504	8.38831e-22	3.3397e-20
SCARNA23	ENSG00000251869	scaRNA	1.66889	-3.32411	0.631116	-5.26704	1.3864e-07	6.18601e-07
Y_RNA	ENSG00000207286	misc_RNA	1.72341	-3.32776	0.825863	-4.02944	5.59098e-05	0.0001611
RNY4P7	ENSG00000201470	misc_RNA	2.4447	-3.32972	0.444618	-7.48894	6.94319e-14	8.09589e-13
DPRXP1	ENSG00000224323	processed_pseudogene	1.94363	-3.33748	0.454352	-7.34558	2.04867e-13	2.22977e-12
DUTP7	ENSG00000250473	processed_pseudogene	2.5042	-3.33788	0.423479	-7.88204	3.22078e-15	4.59821e-14
AC125612.1	ENSG00000257169	processed_pseudogene	2.99746	-3.3437	0.46921	-7.12624	1.03146e-12	1.00661e-11
KCTD9P5	ENSG00000248216	processed_pseudogene	2.1831	-3.34476	0.468328	-7.14192	9.20362e-13	9.04938e-12
AL589863.1	ENSG00000268659	lncRNA	2.33983	-3.34564	0.633386	-5.28215	1.27678e-07	5.72156e-07
ARHGEF3-AS1	ENSG00000240198	lncRNA	1.95053	-3.3457	0.531557	-6.29415	3.09093e-10	2.08367e-09
AP000962.1	ENSG00000269950	lncRNA	1.84672	-3.35195	0.438523	-7.64372	2.11037e-14	2.67081e-13
RN7SKP133	ENSG00000201715	misc_RNA	1.58657	-3.35748	1.11967	-2.99863	0.00271192	0.00574143
AC005972.1	ENSG00000270324	processed_pseudogene	2.00835	-3.35781	0.880196	-3.81484	0.000136269	0.000366726
AC005631.1	ENSG00000253088	misc_RNA	2.39086	-3.36129	0.472604	-7.11229	1.14137e-12	1.10706e-11
AL358333.2	ENSG00000258928	lncRNA	1.78811	-3.36421	0.609835	-5.51658	3.45663e-08	1.69392e-07
MTCYBP3	ENSG00000232373	processed_pseudogene	2.55937	-3.36667	0.344247	-9.77981	1.37467e-22	6.23183e-21
HSPE1P28	ENSG00000230081	processed_pseudogene	1.29903	-3.37	0.701583	-4.80342	1.55979e-06	5.80281e-06
AP003168.1	ENSG00000254915	processed_pseudogene	1.66323	-3.37323	0.545423	-6.18461	6.22574e-10	3.98778e-09
AL118556.3	ENSG00000273675	processed_pseudogene	3.09892	-3.37686	0.51105	-6.60769	3.90369e-11	3.01293e-10
GJA6P	ENSG00000236187	processed_pseudogene	1.51164	-3.37789	0.491889	-6.86718	6.54818e-12	5.65567e-11
RNU6-946P	ENSG00000206605	snRNA	1.37073	-3.37922	0.63732	-5.30224	1.14392e-07	5.16053e-07
AC003989.2	ENSG00000243621	processed_pseudogene	2.27139	-3.38126	0.575612	-5.87419	4.24904e-09	2.39831e-08
Y_RNA	ENSG00000207139	misc_RNA	1.40146	-3.386	0.788872	-4.2922	1.76912e-05	5.55937e-05
SNORA80A	ENSG00000200792	snoRNA	4.37131	-3.38686	0.44334	-7.63942	2.18207e-14	2.75821e-13
AC013286.1	ENSG00000230575	lncRNA	1.7305	-3.39108	0.77899	-4.35318	1.3418e-05	4.30754e-05
AC019270.1	ENSG00000253932	lncRNA	1.7709	-3.39411	0.478903	-7.08726	1.36793e-12	1.30996e-11
SNORA7B	ENSG00000207088	snoRNA	8.89861	-3.39471	0.239309	-14.1854	1.12777e-45	1.11454e-42
ZNF75BP	ENSG00000258212	processed_pseudogene	1.91148	-3.39746	0.946122	-3.59093	0.000329501	0.000827193
SNORA63D	ENSG00000201229	snoRNA	3.15597	-3.3982	0.484557	-7.01299	2.33275e-12	2.16264e-11
AC008873.1	ENSG00000279638	TEC	1.20781	-3.3984	0.817723	-4.15592	3.23976e-05	9.7324e-05
RNU4-6P	ENSG00000222736	snRNA	1.00735	-3.4007	1.32392	-2.56866	0.0102092	0.0192139
AC133106.1	ENSG00000228073	lncRNA	2.18256	-3.40378	0.417566	-8.15149	3.59471e-16	5.95617e-15
AL357568.1	ENSG00000271917	lncRNA	1.88984	-3.40654	0.435532	-7.82157	5.21702e-15	7.22418e-14
RN7SKP69	ENSG00000202260	misc_RNA	2.921	-3.40944	0.433954	-7.85669	3.94408e-15	5.56829e-14
AC008833.1	ENSG00000276214	processed_pseudogene	1.65887	-3.41022	0.684403	-4.98277	6.26806e-07	2.5007e-06
SLC9A9-AS1	ENSG00000240012	lncRNA	1.88892	-3.41099	0.608266	-5.60773	2.05e-08	1.04025e-07
AC055733.2	ENSG00000250592	lncRNA	1.50984	-3.41543	0.795729	-4.2922	1.76908e-05	5.55937e-05
Y_RNA	ENSG00000207326	misc_RNA	1.83209	-3.4184	0.435601	-7.84756	4.24209e-15	5.94937e-14
MTND2P2	ENSG00000229954	processed_pseudogene	1.92151	-3.41977	0.574187	-5.95584	2.58739e-09	1.5067e-08
AL159159.1	ENSG00000278413	misc_RNA	1.87226	-3.42157	0.484733	-7.05867	1.68109e-12	1.5927e-11
BACH1-IT3	ENSG00000234293	lncRNA	1.89041	-3.42232	0.502222	-6.81435	9.46882e-12	7.99653e-11
AP002967.1	ENSG00000279836	TEC	1.52428	-3.42416	0.555592	-6.16308	7.1345e-10	4.53849e-09
RPL39P26	ENSG00000240454	processed_pseudogene	1.56598	-3.42644	0.484626	-7.07027	1.54627e-12	1.47124e-11
Y_RNA	ENSG00000222430	misc_RNA	1.07649	-3.427	0.908559	-3.77191	0.000162003	0.000430304
ZBTB20-AS3	ENSG00000239946	lncRNA	2.19102	-3.42726	0.708957	-4.83423	1.33662e-06	5.03619e-06
AC110603.1	ENSG00000264434	lncRNA	1.19429	-3.42805	1.05473	-3.25016	0.00115341	0.00261883
AL357153.4	ENSG00000274397	unprocessed_pseudogene	2.7023	-3.432	0.402191	-8.53328	1.4226e-17	2.95221e-16
EIF1AXP2	ENSG00000258980	processed_pseudogene	1.9067	-3.43653	0.573143	-5.99593	2.02318e-09	1.19791e-08
SLC30A6P1	ENSG00000232277	processed_pseudogene	2.27219	-3.43701	0.59169	-5.80879	6.2925e-09	3.45695e-08
SNORD56B	ENSG00000207444	snoRNA	1.71608	-3.43847	0.731132	-4.70293	2.56449e-06	9.24589e-06
MTCO2P19	ENSG00000237628	processed_pseudogene	2.03713	-3.43966	0.431485	-7.97169	1.56514e-15	2.34914e-14
MTND1P32	ENSG00000232282	processed_pseudogene	1.98707	-3.44957	0.455353	-7.57561	3.57443e-14	4.35871e-13
SCARNA6	ENSG00000251791	scaRNA	38.0696	-3.4514	0.190132	-18.1526	1.22372e-73	6.0468e-70
RNU6-402P	ENSG00000222610	snRNA	1.34852	-3.4575	0.749557	-4.61273	3.97417e-06	1.38782e-05
USP12-AS1	ENSG00000232162	lncRNA	2.65839	-3.45765	0.4738	-7.2977	2.92733e-13	3.10628e-12
AC013437.1	ENSG00000257284	lncRNA	2.18818	-3.46297	0.698078	-4.96073	7.02305e-07	2.77626e-06
ZBTB8OSP1	ENSG00000183432	processed_pseudogene	2.72924	-3.46298	0.442701	-7.82239	5.18285e-15	7.18267e-14
RNU2-6P	ENSG00000223336	snRNA	2.10772	-3.46921	0.363051	-9.55572	1.22722e-21	4.76656e-20
SNORA22C	ENSG00000207344	snoRNA	4.57898	-3.46987	0.287267	-12.0789	1.36542e-33	2.7983e-31
AP005131.5	ENSG00000267694	lncRNA	3.85344	-3.47485	0.324864	-10.6963	1.05885e-26	8.68802e-25
AC100763.1	ENSG00000254865	lncRNA	2.736	-3.47505	0.610609	-5.69111	1.26213e-08	6.61746e-08
SNORA38	ENSG00000200816	snoRNA	5.31125	-3.48368	0.325154	-10.7139	8.75612e-27	7.26496e-25
SNORA12	ENSG00000212464	snoRNA	17.6676	-3.48594	0.221932	-15.7073	1.34815e-55	2.49813e-52
AL591719.1	ENSG00000228076	processed_pseudogene	2.77207	-3.49541	0.506996	-6.89436	5.41083e-12	4.73962e-11
SCARNA21	ENSG00000252835	scaRNA	30.8597	-3.49629	0.214029	-16.3356	5.50857e-60	1.28935e-56
AL035634.1	ENSG00000236324	lncRNA	2.73194	-3.49686	0.435105	-8.03683	9.21959e-16	1.43261e-14
Y_RNA	ENSG00000202071	misc_RNA	2.03566	-3.50228	0.59743	-5.86223	4.56683e-09	2.56491e-08
AL606517.1	ENSG00000233877	processed_pseudogene	3.89947	-3.50513	0.48426	-7.23811	4.54967e-13	4.70542e-12
RN7SKP90	ENSG00000199883	misc_RNA	2.0091	-3.50972	0.510482	-6.87531	6.18563e-12	5.36442e-11
RNA5SP33	ENSG00000252496	rRNA_pseudogene	1.81765	-3.50975	0.556211	-6.3101	2.78846e-10	1.89268e-09
AC079209.2	ENSG00000254177	lncRNA	3.42875	-3.51075	0.369044	-9.5131	1.85065e-21	7.02235e-20
AC009248.2	ENSG00000278351	lncRNA	1.9717	-3.51516	0.465323	-7.55425	4.21289e-14	5.09257e-13
[truncated: 109 more rows]
