# Supplementary material for: Multi-omics analysis of MRPL-13 as a tumor-promoting marker from pan-cancer to lung adenocarcinoma
Source: Aging (Albany NY). 2023 Oct 12;15(19):10640–80. doi: 10.18632/aging.205104 (PMC10599762; doi:10.18632/aging.205104)
Supplement: Supplementary Material 2 [file aging-15-205104-s004.xlsx]

## Sheet: Sheet 1
Supplementary Material 2. The results of GSEA enrichment analysis of differential genes in patients with high and low expression of MRPL13.
ID	Description	setSize	enrichmentScore	NES	pvalue	p.adjust	qvalues	rank	leading_edge	core_enrichment
KEGG_PROGESTERONE_MEDIATED_OOCYTE_MATURATION	KEGG_PROGESTERONE_MEDIATED_OOCYTE_MATURATION	10	0.727406	2.7805	0.004	0.0218777	0.0100657	703	tags=90%, list=18%, signal=74%	MAD2L1/CCNB1/CCNA2/CCNB2/SPDYC/CDC25C/BUB1/CDK1/PLK1
REACTOME_DNA_REPLICATION	REACTOME_DNA_REPLICATION	10	0.82152	3.14025	0.004	0.0218777	0.0100657	705	tags=100%, list=18%, signal=82%	MCM10/UBE2C/CCNA2/CDC6/GINS2/GINS1/GINS4/CDC45/ORC6/MCM4
WP_GENES_INVOLVED_IN_MALE_INFERTILITY	WP_GENES_INVOLVED_IN_MALE_INFERTILITY	10	0.566769	2.16647	0.004	0.0218777	0.0100657	1697	tags=100%, list=43%, signal=57%	CTCFL/PRDM9/TEX15/PSAT1/TRIP13/SEMG1/EPPIN/PACRG/LTF/MAS1L
WP_RETINOBLASTOMA_GENE_IN_CANCER	WP_RETINOBLASTOMA_GENE_IN_CANCER	10	0.82152	3.14025	0.004	0.0218777	0.0100657	705	tags=100%, list=18%, signal=82%	CCNB1/CCNA2/CCNB2/TTK/RRM2/CDC45/CDK1/KIF4A/TOP2A/MCM4
PID_AURORA_B_PATHWAY	PID_AURORA_B_PATHWAY	11	0.822502	3.30518	0.00425532	0.0218777	0.0100657	702	tags=100%, list=18%, signal=82%	BIRC5/NCAPG/CENPA/AURKA/NCAPH/BUB1/AURKB/NDC80/SGO1/KIF2C/KIF23
PID_FOXM1_PATHWAY	PID_FOXM1_PATHWAY	11	0.822245	3.30415	0.00425532	0.0218777	0.0100657	703	tags=100%, list=18%, signal=82%	BIRC5/CCNB1/CCNA2/CCNB2/CENPA/FOXM1/NEK2/AURKB/CDK1/CKS1B/PLK1
PID_PLK1_PATHWAY	PID_PLK1_PATHWAY	11	0.822245	3.30415	0.00425532	0.0218777	0.0100657	703	tags=100%, list=18%, signal=82%	CCNB1/AURKA/CDC25C/TPX2/BUB1/CDC20/CDK1/NDC80/SGO1/BUB1B/PLK1
REACTOME_ADORA2B_MEDIATED_ANTI_INFLAMMATORY_CYTOKINES_PRODUCTION	REACTOME_ADORA2B_MEDIATED_ANTI_INFLAMMATORY_CYTOKINES_PRODUCTION	11	0.528433	2.12348	0.00425532	0.0218777	0.0100657	127	tags=45%, list=3%, signal=44%	CGA/GNG4/CALCA/CALCB/GIP
REACTOME_APC_C_MEDIATED_DEGRADATION_OF_CELL_CYCLE_PROTEINS	REACTOME_APC_C_MEDIATED_DEGRADATION_OF_CELL_CYCLE_PROTEINS	11	0.822245	3.30415	0.00425532	0.0218777	0.0100657	703	tags=100%, list=18%, signal=82%	MAD2L1/CCNB1/UBE2C/CCNA2/AURKA/NEK2/CDC20/AURKB/CDK1/BUB1B/PLK1
REACTOME_CLASS_B_2_SECRETIN_FAMILY_RECEPTORS_	REACTOME_CLASS_B_2_SECRETIN_FAMILY_RECEPTORS_	11	0.551501	2.21618	0.00425532	0.0218777	0.0100657	518	tags=64%, list=13%, signal=55%	GNG4/CALCA/CALCB/GIP/FZD10/WNT16/PTH2R
REACTOME_MITOTIC_G1_PHASE_AND_G1_S_TRANSITION	REACTOME_MITOTIC_G1_PHASE_AND_G1_S_TRANSITION	11	0.821731	3.30209	0.00425532	0.0218777	0.0100657	705	tags=100%, list=18%, signal=82%	MCM10/CCNB1/CCNA2/CDC6/RRM2/CDC45/CDK1/CKS1B/TOP2A/ORC6/MCM4
REACTOME_PEPTIDE_HORMONE_METABOLISM	REACTOME_PEPTIDE_HORMONE_METABOLISM	11	0.612869	2.46278	0.00425532	0.0218777	0.0100657	550	tags=73%, list=14%, signal=63%	CGA/GPR119/GIP/PCSK1/KIF5C/CDX2/INHBE/AGT
REACTOME_PLATELET_ACTIVATION_SIGNALING_AND_AGGREGATION	REACTOME_PLATELET_ACTIVATION_SIGNALING_AND_AGGREGATION	11	0.597421	2.40071	0.00425532	0.0218777	0.0100657	655	tags=73%, list=17%, signal=61%	F2/SCG3/FGA/GNG4/FGB/TF/DGKK/KNG1
REACTOME_S_PHASE	REACTOME_S_PHASE	11	0.821731	3.30209	0.00425532	0.0218777	0.0100657	705	tags=100%, list=18%, signal=82%	UBE2C/CCNA2/CDC6/GINS2/GINS1/CDCA5/GINS4/CDC45/CKS1B/ORC6/MCM4
REACTOME_TRANSCRIPTIONAL_REGULATION_BY_TP53	REACTOME_TRANSCRIPTIONAL_REGULATION_BY_TP53	11	0.847162	3.40428	0.00425532	0.0218777	0.0100657	606	tags=100%, list=16%, signal=85%	BIRC5/TXNRD1/CCNB1/CCNA2/AURKA/CDC25C/TPX2/PMAIP1/AURKB/CDK1/EXO1
REACTOME_ANTI_INFLAMMATORY_RESPONSE_FAVOURING_LEISHMANIA_PARASITE_INFECTION	REACTOME_ANTI_INFLAMMATORY_RESPONSE_FAVOURING_LEISHMANIA_PARASITE_INFECTION	12	0.497167	2.07	0.00465116	0.0218777	0.0100657	127	tags=42%, list=3%, signal=40%	CGA/GNG4/CALCA/CALCB/GIP
WP_HAIR_FOLLICLE_DEVELOPMENT_CYTODIFFERENTIATION_PART_3_OF_3	WP_HAIR_FOLLICLE_DEVELOPMENT_CYTODIFFERENTIATION_PART_3_OF_3	12	0.651523	2.71268	0.00465116	0.0218777	0.0100657	777	tags=83%, list=20%, signal=67%	CASP14/KLK5/KLK6/KLK14/KLK13/HOXC12/DSG4/LHX2/FST/HR
WP_NEURAL_CREST_DIFFERENTIATION	WP_NEURAL_CREST_DIFFERENTIATION	12	0.758428	3.15779	0.00465116	0.0218777	0.0100657	411	tags=83%, list=11%, signal=75%	COL2A1/ASCL1/DLL3/GBX2/LHX1/CDH7/ZIC5/FOXD3/OLIG3/LHX2
KEGG_OOCYTE_MEIOSIS	KEGG_OOCYTE_MEIOSIS	14	0.762538	3.475	0.00520833	0.0218777	0.0100657	703	tags=93%, list=18%, signal=76%	CALML3/CALML5/MAD2L1/CCNB1/CCNB2/AURKA/SPDYC/CDC25C/BUB1/CDC20/CDK1/SGO1/PLK1
KEGG_PATHWAYS_IN_CANCER	KEGG_PATHWAYS_IN_CANCER	14	0.517711	2.35929	0.00520833	0.0218777	0.0100657	732	tags=71%, list=19%, signal=58%	FZD10/FGF21/FGF5/FGF12/BIRC5/WNT16/CKS1B/RAD51/DCC/ZBTB16
REACTOME_CARDIAC_CONDUCTION	REACTOME_CARDIAC_CONDUCTION	13	0.662812	2.86777	0.00520833	0.0218777	0.0100657	1325	tags=100%, list=34%, signal=66%	NKX2-5/KCNK9/CACNG2/FGF12/KCNJ4/TRDN/CACNG7/RYR2/KCNE1/SCN4B/SCN10A/ATP1A2/SCN7A
REACTOME_FLT3_SIGNALING	REACTOME_FLT3_SIGNALING	13	0.441532	1.91036	0.00520833	0.0218777	0.0100657	2186	tags=100%, list=56%, signal=44%	FGA/FGF5/NEFL/FGB/EREG/DUSP9/USP17L2/IL5/RASGRF1/IL5RA/GFRA1/ERBB4/NRG3
REACTOME_LEISHMANIA_INFECTION	REACTOME_LEISHMANIA_INFECTION	13	0.488049	2.11163	0.00520833	0.0218777	0.0100657	2005	tags=100%, list=51%, signal=49%	CGA/GNG4/CALCA/CALCB/GIP/PTH2R/IGHV3-13/CTSG/GLP1R/RXFP2/MC2R/HTR4/MC5R
REACTOME_MEMBRANE_TRAFFICKING	REACTOME_MEMBRANE_TRAFFICKING	14	0.503819	2.29598	0.00520833	0.0218777	0.0100657	1300	tags=86%, list=33%, signal=57%	GJA3/CLVS2/EREG/TF/TUBB2B/KIF1A/KIF4A/KIF2C/KIF23/SYT8/CHRM2/CFTR
REACTOME_MITOTIC_G2_G2_M_PHASES	REACTOME_MITOTIC_G2_G2_M_PHASES	13	0.737042	3.18894	0.00520833	0.0218777	0.0100657	703	tags=92%, list=18%, signal=76%	CCNB1/CCNA2/CCNB2/HMMR/AURKA/TUBB2B/CDC25C/FOXM1/NEK2/TPX2/CDK1/PLK1
WP_CELL_CYCLE	WP_CELL_CYCLE	13	0.822154	3.55719	0.00520833	0.0218777	0.0100657	705	tags=100%, list=18%, signal=82%	CCNB1/CCNA2/CCNB2/TTK/CDC6/CDC25C/CDC45/BUB1/CDC20/CDK1/ORC6/PLK1/MCM4
WP_FOCAL_ADHESIONPI3KAKTMTORSIGNALING_PATHWAY	WP_FOCAL_ADHESIONPI3KAKTMTORSIGNALING_PATHWAY	13	0.471331	2.0393	0.00520833	0.0218777	0.0100657	668	tags=62%, list=17%, signal=51%	COL2A1/GNG4/FGF21/EIF4E1B/FGF12/PPP2R2C/IRS4/EIF4EBP1
WP_VITAMIN_D_RECEPTOR_PATHWAY	WP_VITAMIN_D_RECEPTOR_PATHWAY	13	0.530471	2.29517	0.00520833	0.0218777	0.0100657	919	tags=77%, list=24%, signal=59%	CASP14/IGFBP1/KLK6/S100A2/CDX2/CYP24A1/KNG1/CYP2B6/IGSF9B/HSD17B2
KEGG_CELL_CYCLE	KEGG_CELL_CYCLE	15	0.822576	3.86752	0.00526316	0.0218777	0.0100657	705	tags=100%, list=18%, signal=82%	MAD2L1/CCNB1/CCNA2/CCNB2/TTK/CDC6/CDC25C/CDC45/BUB1/CDC20/CDK1/BUB1B/ORC6/PLK1/MCM4
REACTOME_MITOTIC_SPINDLE_CHECKPOINT	REACTOME_MITOTIC_SPINDLE_CHECKPOINT	15	0.823091	3.86994	0.00526316	0.0218777	0.0100657	703	tags=100%, list=18%, signal=82%	MAD2L1/BIRC5/UBE2C/NUF2/CENPA/SPC25/SKA1/BUB1/CDC20/AURKB/NDC80/SGO1/BUB1B/KIF2C/PLK1
REACTOME_REGULATION_OF_INSULIN_LIKE_GROWTH_FACTOR_IGF_TRANSPORT_AND_UPTAKE_BY_INSULIN_LIKE_GROWTH_FACTOR_BINDING_PROTEINS_IGFBPS_	REACTOME_REGULATION_OF_INSULIN_LIKE_GROWTH_FACTOR_IGF_TRANSPORT_AND_UPTAKE_BY_INSULIN_LIKE_GROWTH_FACTOR_BINDING_PROTEINS_IGFBPS_	15	0.629031	2.95752	0.00526316	0.0218777	0.0100657	655	tags=80%, list=17%, signal=67%	F2/IGFBP1/SCG3/AFP/FGA/VGF/SCG2/KLK13/NOTUM/TF/CHGB/KNG1
REACTOME_RHO_GTPASES_ACTIVATE_FORMINS	REACTOME_RHO_GTPASES_ACTIVATE_FORMINS	17	0.758082	3.73402	0.00568182	0.0218777	0.0100657	703	tags=94%, list=18%, signal=78%	MAD2L1/BIRC5/PFN2/NUF2/CENPA/SPC25/SKA1/TUBB2B/BUB1/CDC20/AURKB/NDC80/SGO1/BUB1B/KIF2C/PLK1
WP_PI3KAKT_SIGNALING_PATHWAY	WP_PI3KAKT_SIGNALING_PATHWAY	17	0.52351	2.57861	0.00568182	0.0218777	0.0100657	668	tags=65%, list=17%, signal=54%	COL2A1/G6PC/PCK1/GNG4/FGF21/EIF4E1B/FGF5/FGF12/PPP2R2C/CSH2/EIF4EBP1
REACTOME_SEPARATION_OF_SISTER_CHROMATIDS	REACTOME_SEPARATION_OF_SISTER_CHROMATIDS	18	0.761705	3.85031	0.00578035	0.0218777	0.0100657	703	tags=94%, list=18%, signal=78%	MAD2L1/BIRC5/UBE2C/NUF2/CENPA/SPC25/SKA1/TUBB2B/CDCA5/BUB1/CDC20/AURKB/NDC80/SGO1/BUB1B/KIF2C/PLK1
REACTOME_VESICLE_MEDIATED_TRANSPORT	REACTOME_VESICLE_MEDIATED_TRANSPORT	18	0.523848	2.64798	0.00578035	0.0218777	0.0100657	1354	tags=89%, list=35%, signal=58%	GJA3/CLVS2/EREG/TF/TUBB2B/KIF1A/AMBP/KIF4A/KIF2C/KIF23/IGHV3-13/SYT8/HP/CHRM2/CFTR/SCGB3A2
REACTOME_FORMATION_OF_THE_CORNIFIED_ENVELOPE	REACTOME_FORMATION_OF_THE_CORNIFIED_ENVELOPE	19	0.73699	3.80614	0.00606061	0.0218777	0.0100657	706	tags=89%, list=18%, signal=74%	CASP14/KLK12/KLK5/KRT6A/LCE3E/KLK14/KRT37/KLK13/KRT33A/DSG4/SPRR2E/PI3/KRT75/KRT6C/SPRR2A/KRT14/KRT81
REACTOME_METABOLISM_OF_AMINO_ACIDS_AND_DERIVATIVES	REACTOME_METABOLISM_OF_AMINO_ACIDS_AND_DERIVATIVES	19	0.532165	2.74834	0.00606061	0.0218777	0.0100657	1553	tags=95%, list=40%, signal=57%	PAH/CGA/CPS1/GLDC/PRODH2/TXNRD1/SLC25A21/RPL39L/PSAT1/CBSL/NAT8L/DDC/PRODH/ASPA/OTC/INMT/DUOX1/TYR
REACTOME_SIGNALING_BY_RECEPTOR_TYROSINE_KINASES	REACTOME_SIGNALING_BY_RECEPTOR_TYROSINE_KINASES	19	0.43964	2.27049	0.00606061	0.0218777	0.0100657	2196	tags=100%, list=56%, signal=44%	COL2A1/ASCL1/VGF/FGF5/GABRQ/EREG/FOSL1/CDK5R2/GABRA1/IRS4/FOSB/PGR/CMA1/COL6A6/NTRK3/VEGFD/ERBB4/NRG3/PLG
WP_SUDDEN_INFANT_DEATH_SYNDROME_SIDS_SUSCEPTIBILITY_PATHWAYS	WP_SUDDEN_INFANT_DEATH_SYNDROME_SIDS_SUSCEPTIBILITY_PATHWAYS	19	0.616283	3.18276	0.00606061	0.0218777	0.0100657	690	tags=74%, list=18%, signal=61%	TAC1/TLX3/G6PC/DLX2/PAH/NEUROD1/ASCL1/PHOX2A/FEV/TF/FOXM1/NKX2-2/GABRA1/DDC
REACTOME_G_ALPHA_Q_SIGNALLING_EVENTS	REACTOME_G_ALPHA_Q_SIGNALLING_EVENTS	20	0.442346	2.31688	0.00653595	0.0218777	0.0100657	655	tags=60%, list=17%, signal=50%	NTS/TAC1/F2/GNG4/NTSR1/TACR3/GAST/HTR2C/NMU/AGT/DGKK/KNG1
REACTOME_MUSCLE_CONTRACTION	REACTOME_MUSCLE_CONTRACTION	20	0.468767	2.45526	0.00653595	0.0218777	0.0100657	1325	tags=85%, list=34%, signal=56%	NKX2-5/KCNK9/CACNG2/TRIM72/FGF12/KCNJ4/TRDN/TNNT1/CACNG7/RYR2/KCNE1/SCN4B/SCN10A/MYH11/TTN/ATP1A2/SCN7A
REACTOME_PEPTIDE_LIGAND_BINDING_RECEPTORS	REACTOME_PEPTIDE_LIGAND_BINDING_RECEPTORS	20	0.523076	2.73972	0.00653595	0.0218777	0.0100657	744	tags=65%, list=19%, signal=53%	NTS/TAC1/F2/NTSR1/TACR3/PRLHR/GAL/GALR1/NPY/NMU/AGT/KNG1/ACKR1
REACTOME_RESOLUTION_OF_SISTER_CHROMATID_COHESION	REACTOME_RESOLUTION_OF_SISTER_CHROMATID_COHESION	20	0.768274	4.02399	0.00653595	0.0218777	0.0100657	703	tags=95%, list=18%, signal=78%	MAD2L1/BIRC5/CCNB1/NUF2/CCNB2/CENPA/SPC25/SKA1/TUBB2B/CDCA5/BUB1/CDC20/AURKB/CDK1/NDC80/SGO1/BUB1B/KIF2C/PLK1
REACTOME_ADAPTIVE_IMMUNE_SYSTEM	REACTOME_ADAPTIVE_IMMUNE_SYSTEM	21	0.407445	2.20927	0.00684932	0.0218777	0.0100657	1609	tags=86%, list=41%, signal=51%	COL2A1/CTSV/UBE2C/TUBB2B/CDC20/KIF4A/KIF2C/KIF23/IGHV3-13/ZBTB16/CD22/TRIM71/ASB11/UBE2U/BLK/CD207/FBXO40/TUBA4B
REACTOME_MITOTIC_METAPHASE_AND_ANAPHASE	REACTOME_MITOTIC_METAPHASE_AND_ANAPHASE	21	0.771327	4.18233	0.00684932	0.0218777	0.0100657	703	tags=95%, list=18%, signal=79%	MAD2L1/BIRC5/CCNB1/UBE2C/NUF2/CCNB2/CENPA/SPC25/SKA1/TUBB2B/CDCA5/BUB1/CDC20/AURKB/CDK1/NDC80/SGO1/BUB1B/KIF2C/PLK1
REACTOME_NEUROTRANSMITTER_RECEPTORS_AND_POSTSYNAPTIC_SIGNAL_TRANSMISSION	REACTOME_NEUROTRANSMITTER_RECEPTORS_AND_POSTSYNAPTIC_SIGNAL_TRANSMISSION	21	0.397788	2.1569	0.00684932	0.0218777	0.0100657	646	tags=57%, list=17%, signal=48%	GNG4/CACNG2/CHRNA9/NEFL/KCNJ4/GABRQ/GABRA3/GABRR3/TUBB2B/GABRR1/PPM1E/GABRA1
REACTOME_CYTOKINE_SIGNALING_IN_IMMUNE_SYSTEM	REACTOME_CYTOKINE_SIGNALING_IN_IMMUNE_SYSTEM	24	0.390994	2.32457	0.00729927	0.0218777	0.0100657	2186	tags=96%, list=56%, signal=42%	FGA/FGF5/NEFL/FGB/BIRC5/EREG/USP41/DUSP9/IL20RB/CA1/USP17L2/CTSG/PTPN13/TNFRSF13B/IL5/RASGRF1/IL5RA/AGER/GFRA1/IL37/FCER2/ERBB4/NRG3
REACTOME_TRANSMISSION_ACROSS_CHEMICAL_SYNAPSES	REACTOME_TRANSMISSION_ACROSS_CHEMICAL_SYNAPSES	24	0.383986	2.2829	0.00729927	0.0218777	0.0100657	2214	tags=96%, list=57%, signal=42%	GNG4/CACNG2/CHRNA9/NEFL/KCNJ4/GABRQ/GABRA3/SLC1A6/GABRR3/TUBB2B/GABRR1/PPM1E/GABRA1/HTR3E/SLC5A7/TUBA4B/CHRNB3/RASGRF1/CHRNA2/GABRA4/ERBB4/SLC6A4/GRIA1
REACTOME_EXTRACELLULAR_MATRIX_ORGANIZATION	REACTOME_EXTRACELLULAR_MATRIX_ORGANIZATION	25	0.334797	2.01473	0.00757576	0.0218777	0.0100657	2196	tags=92%, list=56%, signal=41%	COL2A1/FGA/FGB/CTSV/COL26A1/CAPN6/CTSG/MFAP4/PRSS2/CAPN9/CAPN8/CMA1/COL6A6/CAPNS2/CAPN3/COL19A1/MUSK/COLGALT2/TNXB/CEACAM8/ADAMTS8/TNR/PLG
REACTOME_NERVOUS_SYSTEM_DEVELOPMENT	REACTOME_NERVOUS_SYSTEM_DEVELOPMENT	25	0.480952	2.89426	0.00757576	0.0218777	0.0100657	1325	tags=84%, list=34%, signal=56%	DPYSL5/COL2A1/UNC5D/PFN2/LHX2/RPL39L/CNTN1/EPHA8/EPHA6/DSCAM/EPHA7/TUBB2B/KIF4A/DCC/SCN4B/SCN10A/MYH11/SLIT3/COL6A6/CNTN6/SCN7A
REACTOME_KERATINIZATION	REACTOME_KERATINIZATION	23	0.67714	3.81733	0.00769231	0.0218777	0.0100657	706	tags=83%, list=18%, signal=68%	CASP14/KLK12/KLK5/KRT6A/LCE3E/KLK14/KRT37/KLK13/KRT33A/DSG4/SPRR2E/KRTAP3-1/PI3/KRT75/KRT6C/KRTAP3-2/SPRR2A/KRT14/KRT81
REACTOME_MITOTIC_PROMETAPHASE	REACTOME_MITOTIC_PROMETAPHASE	23	0.776165	4.37558	0.00769231	0.0218777	0.0100657	703	tags=96%, list=18%, signal=79%	MAD2L1/BIRC5/CCNB1/NCAPG/NUF2/CCNB2/CENPA/SPC25/SKA1/TUBB2B/CDCA5/NEK2/NCAPH/BUB1/CDC20/AURKB/CDK1/NDC80/SGO1/BUB1B/KIF2C/PLK1
REACTOME_SUMOYLATION	REACTOME_SUMOYLATION	10	0.469658	1.79526	0.008	0.0218777	0.0100657	1549	tags=90%, list=40%, signal=54%	FOXL2/BIRC5/AURKA/AURKB/TOP2A/PGR/H4C5/H4C13/H4C2
REACTOME_RHO_GTPASE_EFFECTORS	REACTOME_RHO_GTPASE_EFFECTORS	28	0.37365	2.40592	0.00819672	0.0218777	0.0100657	703	tags=61%, list=18%, signal=50%	MAD2L1/BIRC5/PFN2/NUF2/CENPA/SPC25/SKA1/TUBB2B/CDC25C/BUB1/CDC20/AURKB/NDC80/SGO1/BUB1B/KIF2C/PLK1
REACTOME_SIGNALING_BY_RHO_GTPASES	REACTOME_SIGNALING_BY_RHO_GTPASES	30	0.407659	2.7793	0.00833333	0.0218777	0.0100657	703	tags=63%, list=18%, signal=52%	ARHGAP36/MAD2L1/BIRC5/PFN2/NUF2/CENPA/SPC25/SKA1/TUBB2B/DEPDC1B/CDC25C/BUB1/CDC20/AURKB/NDC80/SGO1/BUB1B/KIF2C/PLK1
WP_NUCLEAR_RECEPTORS_METAPATHWAY	WP_NUCLEAR_RECEPTORS_METAPATHWAY	30	0.321823	2.1941	0.00833333	0.0218777	0.0100657	602	tags=43%, list=15%, signal=37%	SLC6A15/IGFBP1/ABCC2/PCK1/APOC3/UGT1A3/UGT1A6/KLK15/TXNRD1/SRXN1/GCLC/UGT2B4/CDK1
REACTOME_HEMOSTASIS	REACTOME_HEMOSTASIS	29	0.452142	2.973	0.00840336	0.0218777	0.0100657	731	tags=66%, list=19%, signal=54%	F2/SCG3/FGA/GNG4/PSG4/F7/FGB/HBE1/TF/TUBB2B/PSG8/KIF1A/DGKK/KNG1/KIF4A/KIF2C/KIF23/IGHV3-13/CD177
REACTOME_INFECTIOUS_DISEASE	REACTOME_INFECTIOUS_DISEASE	29	0.306685	2.01657	0.00840336	0.0218777	0.0100657	1609	tags=76%, list=41%, signal=45%	CGA/GNG4/CALCA/CALCB/GIP/TXNRD1/H2AW/RPL39L/TUBB2B/PTH2R/IGHV3-13/CTSG/H4C5/GLP1R/H4C13/RXFP2/H2AC21/LTF/H2AC12/MC2R/H4C2/TUBA4B
REACTOME_CELL_CYCLE_CHECKPOINTS	REACTOME_CELL_CYCLE_CHECKPOINTS	32	0.590518	4.13686	0.00925926	0.0229205	0.0105455	705	tags=81%, list=18%, signal=67%	MAD2L1/BIRC5/MCM10/CCNB1/UBE2C/NUF2/CCNA2/CCNB2/CENPA/SPC25/SKA1/CDC6/CDC25C/CDC45/BUB1/CDC20/AURKB/CDK1/EXO1/NDC80/SGO1/BUB1B/KIF2C/ORC6/PLK1/MCM4
REACTOME_CLASS_A_1_RHODOPSIN_LIKE_RECEPTORS_	REACTOME_CLASS_A_1_RHODOPSIN_LIKE_RECEPTORS_	32	0.415984	2.91416	0.00925926	0.0229205	0.0105455	2005	tags=94%, list=51%, signal=46%	NTS/TAC1/F2/CGA/NTSR1/TACR3/HRH3/PRLHR/GAL/GALR1/HTR2C/NPY/NMU/AGT/KNG1/ACKR1/HTR1B/CNR2/PRLH/SSTR5/CHRM2/RXFP2/GPR17/GNRHR/MC2R/PTGFR/HTR4/CCL16/EDN3/MC5R
REACTOME_NEURONAL_SYSTEM	REACTOME_NEURONAL_SYSTEM	32	0.459513	3.21911	0.00925926	0.0229205	0.0105455	646	tags=62%, list=17%, signal=53%	LRRTM3/GNG4/KCNK9/CACNG2/KCNV1/CHRNA9/NEFL/KCNJ4/KCNH6/GABRQ/GABRA3/KCNG1/SLC1A6/GABRR3/TUBB2B/KCNF1/GABRR1/KCNC2/PPM1E/GABRA1
REACTOME_M_PHASE	REACTOME_M_PHASE	33	0.492491	3.46936	0.01	0.0243548	0.0112054	703	tags=73%, list=18%, signal=60%	MAD2L1/BIRC5/CCNB1/UBE2C/NCAPG/NUF2/CCNB2/CENPA/SPC25/SKA1/TUBB2B/CDCA5/NEK2/NCAPH/BUB1/CDC20/AURKB/CDK1/NDC80/SGO1/BUB1B/KIF2C/KIF23/PLK1
REACTOME_DEGRADATION_OF_THE_EXTRACELLULAR_MATRIX	REACTOME_DEGRADATION_OF_THE_EXTRACELLULAR_MATRIX	16	0.396562	1.91544	0.0106952	0.025234	0.0116099	1473	tags=81%, list=38%, signal=51%	COL2A1/CTSV/COL26A1/CAPN6/CTSG/PRSS2/CAPN9/CAPN8/CMA1/COL6A6/CAPNS2/CAPN3/COL19A1
REACTOME_G2_M_CHECKPOINTS	REACTOME_G2_M_CHECKPOINTS	16	0.375783	1.81507	0.0106952	0.025234	0.0116099	705	tags=62%, list=18%, signal=51%	MCM10/CCNB1/CCNB2/CDC6/CDC25C/CDC45/CDK1/EXO1/ORC6/MCM4
REACTOME_MAPK_FAMILY_SIGNALING_CASCADES	REACTOME_MAPK_FAMILY_SIGNALING_CASCADES	17	0.392848	1.93502	0.0113636	0.0259986	0.0119617	2377	tags=100%, list=61%, signal=39%	IGF2BP1/FGA/FGF5/NEFL/FGB/EREG/DUSP9/CDK1/USP17L2/IL5/RASGRF1/IL5RA/GFRA1/ERBB4/NRG3/MIR34B/MIR34C
REACTOME_SLC_MEDIATED_TRANSMEMBRANE_TRANSPORT	REACTOME_SLC_MEDIATED_TRANSMEMBRANE_TRANSPORT	17	0.423929	2.08811	0.0113636	0.0259986	0.0119617	439	tags=47%, list=11%, signal=42%	SLC6A15/RHCG/LCN15/SLC30A10/FGF21/SLC7A3/SLC38A3/SLC1A6
KEGG_NEUROACTIVE_LIGAND_RECEPTOR_INTERACTION	KEGG_NEUROACTIVE_LIGAND_RECEPTOR_INTERACTION	38	0.343173	2.47795	0.0125	0.0281716	0.0129615	2432	tags=97%, list=62%, signal=37%	F2/CGA/NTSR1/TACR3/CHRNA9/HRH3/PRLHR/GPR50/GALR1/GABRQ/HTR2C/GABRA3/PTH2R/GABRR1/GABRA1/HTR1B/CNR2/CTSG/PRSS2/SSTR5/CHRM2/GLP1R/RXFP2/GNRHR/MC2R/CHRNB3/PTGFR/HTR4/GRM6/CHRNA2/GABRA4/MC5R/CHRM1/PLG/GRIA1/GRM7/GABRP
NABA_ECM_REGULATORS	NABA_ECM_REGULATORS	21	0.351017	1.9033	0.0136986	0.030419	0.0139955	2541	tags=100%, list=65%, signal=35%	F2/MMP26/SERPINB12/F7/CTSV/AGT/PI3/AMBP/KNG1/CTSG/SERPINB10/PRSS2/SERPINI2/ITIH5/HPSE2/ADAMTS8/SERPINB11/PZP/PLG/ADAM20/ELANE
NABA_CORE_MATRISOME	NABA_CORE_MATRISOME	28	0.272346	1.75363	0.0163934	0.035363	0.0162702	2423	tags=93%, list=62%, signal=35%	COL2A1/IGFBP1/FGA/RSPO3/AMELY/FGB/COCH/FGL1/COL26A1/ABI3BP/HMCN1/MFAP4/OGN/SLIT3/COL6A6/RSPO1/COL19A1/VWA3B/DMBT1/TNXB/PRG4/TNR/VWA3A/LGI3/VWA5B1/RSPO2
REACTOME_TRANSPORT_OF_SMALL_MOLECULES	REACTOME_TRANSPORT_OF_SMALL_MOLECULES	44	0.441893	3.42612	0.0163934	0.035363	0.0162702	1718	tags=91%, list=44%, signal=51%	SLC6A15/RHCG/LCN15/ABCC2/SLC30A10/GNG4/APOC3/FGF21/SLC7A3/APOF/BEST3/SLC38A3/TRDN/TF/SLC1A6/CLCA1/CA1/ABCA6/ANGPTL3/SLC9C1/RYR2/ABCA9/ATP13A4/AQP10/SLC13A2/ATP1A2/CFTR/SLC22A6/SLC5A7/SLC24A5/ABCA10/CA4/AQP2/SLC9C2/STOML3/RHAG/TRPM1/ABCA8/GPIHBP1/SLC5A9
REACTOME_ION_CHANNEL_TRANSPORT	REACTOME_ION_CHANNEL_TRANSPORT	11	0.427848	1.71929	0.0170213	0.0362002	0.0166554	1646	tags=91%, list=42%, signal=53%	BEST3/TRDN/CLCA1/SLC9C1/RYR2/ATP13A4/ATP1A2/SLC9C2/STOML3/TRPM1
REACTOME_RNA_POLYMERASE_II_TRANSCRIPTION	REACTOME_RNA_POLYMERASE_II_TRANSCRIPTION	47	0.337097	2.73622	0.0175439	0.0367934	0.0169283	631	tags=53%, list=16%, signal=45%	IGFBP1/G6PC/NR0B1/CGA/PCK1/FOXG1/NKX2-5/RSPO3/DLX6/BIRC5/CTSV/NPY/TXNRD1/CCNB1/UBE2C/CCNA2/AURKA/RRM2/CDC25C/TPX2/PMAIP1/AURKB/CDK1/EXO1/ZNF716
REACTOME_CELL_CYCLE_MITOTIC	REACTOME_CELL_CYCLE_MITOTIC	50	0.601182	4.8356	0.0208333	0.0430936	0.019827	705	tags=82%, list=18%, signal=68%	MAD2L1/BIRC5/MCM10/CCNB1/UBE2C/NCAPG/NUF2/CCNA2/CCNB2/CENPA/HMMR/SPC25/SKA1/AURKA/CDC6/GINS2/TUBB2B/GINS1/RRM2/CDCA5/CDC25C/FOXM1/NEK2/TPX2/GINS4/CDC45/NCAPH/BUB1/CDC20/AURKB/CDK1/CKS1B/NDC80/SGO1/BUB1B/TOP2A/KIF2C/ORC6/KIF23/PLK1/MCM4
KEGG_CALCIUM_SIGNALING_PATHWAY	KEGG_CALCIUM_SIGNALING_PATHWAY	12	0.397776	1.65618	0.0232558	0.0474544	0.0218333	335	tags=42%, list=9%, signal=38%	CALML3/CALML5/NTSR1/TACR3/HTR2C
REACTOME_GPCR_LIGAND_BINDING	REACTOME_GPCR_LIGAND_BINDING	55	0.284775	2.54006	0.0238095	0.0479365	0.0220551	550	tags=38%, list=14%, signal=33%	NTS/TAC1/F2/CGA/GNG4/CALCA/CALCB/GIP/NTSR1/FZD10/TACR3/HRH3/PRLHR/GAL/GALR1/HTR2C/NPY/WNT16/NMU/PTH2R/AGT
WP_NRF2_PATHWAY	WP_NRF2_PATHWAY	16	0.342927	1.65637	0.026738	0.0523216	0.0240727	511	tags=44%, list=13%, signal=38%	SLC6A15/ABCC2/UGT1A3/UGT1A6/TXNRD1/SRXN1/GCLC
REACTOME_CELL_CYCLE	REACTOME_CELL_CYCLE	60	0.624418	6.10578	0.027027	0.0523216	0.0240727	705	tags=83%, list=18%, signal=69%	PRDM9/TEX15/MAD2L1/DSCC1/BIRC5/MCM10/CCNB1/UBE2C/NCAPG/NUF2/CCNA2/OIP5/CCNB2/CENPA/HMMR/SPC25/SKA1/AURKA/CDC6/GINS2/TUBB2B/GINS1/RRM2/CDCA5/CDC25C/FOXM1/NEK2/TPX2/GINS4/CDC45/HJURP/NCAPH/CENPW/BUB1/CDC20/AURKB/CDK1/CKS1B/EXO1/NDC80/SGO1/TERT/BUB1B/TOP2A/KIF2C/ORC6/RAD51/KIF23/PLK1/MCM4
REACTOME_DISEASE	REACTOME_DISEASE	62	0.247496	2.37621	0.027027	0.0523216	0.0240727	530	tags=37%, list=14%, signal=33%	F2/G6PC/PAH/ABCC2/CGA/FGA/GNG4/CALCA/CALCB/GIP/FGF5/NEIL3/FGB/EREG/TXNRD1/UBE2C/H2AW/RPL39L/DUSP9/TUBB2B/GCLC/PTH2R/CDC25C
REACTOME_POST_TRANSLATIONAL_PROTEIN_MODIFICATION	REACTOME_POST_TRANSLATIONAL_PROTEIN_MODIFICATION	66	0.305675	2.87379	0.0294118	0.0562174	0.0258651	671	tags=50%, list=17%, signal=42%	F2/IGFBP1/SCG3/AFP/CGA/FGA/GP2/VGF/SCG2/LY6K/UCHL1/F7/FOXL2/BIRC5/NOTUM/UBE2C/TF/H2AW/CCNA2/UBE2T/AURKA/TUBB2B/CHGB/MDGA2/LY6D/CDC20/LYPD4/AURKB/CDK1/RAB3B/KNG1/TOP2A/MUCL1
REACTOME_INNATE_IMMUNE_SYSTEM	REACTOME_INNATE_IMMUNE_SYSTEM	43	0.243167	1.87648	0.0307692	0.0580769	0.0267206	1053	tags=56%, list=27%, signal=41%	DEFA5/F2/CALML5/DEFA6/CPN1/FGA/SERPINB12/GGH/FGB/CTSV/PI3/MUCL1/IGHV3-13/CHIT1/CD177/ABCA13/SEMG1/RAB44/RNASE8/CTSG/SERPINB10/PRSS2/HP/EPPIN
REACTOME_BIOLOGICAL_OXIDATIONS	REACTOME_BIOLOGICAL_OXIDATIONS	28	0.242518	1.56157	0.0327869	0.0611212	0.0281213	2964	tags=100%, list=76%, signal=24%	UGT1A3/UGT3A1/GLYATL3/CYP4F3/UGT1A6/GCLC/UGT2B4/CYP24A1/CYP2B6/ACSM2B/CYP3A7/ACSM2A/CYP2F1/UGT1A8/AADAC/CYP2C19/ADH1B/CYP4B1/UGT2A3/UGT1A9/ADH1A/CYP2C9/CYP3A5/UGT2B15/SULT1B1/UGT1A10/CYP4A22/CYP4A11
REACTOME_CELLULAR_RESPONSES_TO_EXTERNAL_STIMULI	REACTOME_CELLULAR_RESPONSES_TO_EXTERNAL_STIMULI	23	0.268399	1.51308	0.0384615	0.0708255	0.0325862	2593	tags=96%, list=66%, signal=32%	MT1A/MT1H/HMGA2/TXNRD1/UBE2C/CCNA2/RPL39L/TUBB2B/NOX5/MT1G/H1-4/PGR/H4C5/H4C13/H4C2/TUBA4B/H1-1/H1-3/H2AC4/H4C3/H3C11/H2BC3
REACTOME_OLFACTORY_SIGNALING_PATHWAY	REACTOME_OLFACTORY_SIGNALING_PATHWAY	30	-0.351841	-1.52111	0.0396825	0.0721935	0.0332156	1270	tags=53%, list=33%, signal=36%	OR5P3/OR2B2/OR6A2/OR5P2/OR2D2/OR52D1/OR10A4/OR10A2/OR13H1/OR13D1/OR52B6/OR1L6/OR2D3/OR10A5/OR52H1/OR1L4
REACTOME_DEVELOPMENTAL_BIOLOGY	REACTOME_DEVELOPMENTAL_BIOLOGY	75	0.499278	5.14194	0.0416667	0.0749008	0.0344612	723	tags=67%, list=19%, signal=55%	CASP14/DPYSL5/LIN28A/INSM1/COL2A1/KLK12/KLK5/PCK1/NEUROD1/ZIC3/PTF1A/UNC5D/CACNG2/KRT6A/LCE3E/KLK14/KRT37/KLK13/CDX2/FOXD3/KRT33A/PFN2/DSG4/SPRR2E/NEUROG3/LHX2/RPL39L/ZSCAN10/CER1/CNTN1/MYOD1/EPHA8/EPHA6/DSCAM/KRTAP3-1/EPHA7/TUBB2B/PI3/KRT75/KRT6C/KRTAP3-2/SALL1/NKX2-2/RFX6/SPRR2A/KIF4A/HOXA1/KRT14/KRT81/DCC
REACTOME_NEUTROPHIL_DEGRANULATION	REACTOME_NEUTROPHIL_DEGRANULATION	19	0.312341	1.61307	0.0424242	0.0753654	0.0346749	1367	tags=74%, list=35%, signal=48%	CALML5/SERPINB12/GGH/CHIT1/CD177/ABCA13/RAB44/CTSG/SERPINB10/PRSS2/HP/MGAM/AZU1/LTF
NABA_SECRETED_FACTORS	NABA_SECRETED_FACTORS	30	0.215424	1.4687	0.05	0.0877907	0.0403917	2599	tags=93%, list=67%, signal=31%	FGF21/TCHHL1/S100A2/FGF5/FGF12/ISM2/INHBE/EREG/WNT16/CSH2/CBLN2/FST/ANGPTL3/SFRP5/CCL14/SHH/INSL6/S100G/IL5/CCL16/VEGFD/MEGF11/IL37/NRG3/FLG2/VWC2L/HHIP/IHH
REACTOME_SIGNALING_BY_INTERLEUKINS	REACTOME_SIGNALING_BY_INTERLEUKINS	11	0.372207	1.49569	0.0595745	0.103399	0.0475731	2455	tags=100%, list=63%, signal=37%	BIRC5/IL20RB/CA1/CTSG/PTPN13/IL5/IL5RA/AGER/IL37/FCER2/H3C11
REACTOME_G_ALPHA_I_SIGNALLING_EVENTS	REACTOME_G_ALPHA_I_SIGNALLING_EVENTS	35	0.205921	1.48889	0.0652174	0.111907	0.0514874	1244	tags=60%, list=32%, signal=41%	GNG4/APOC3/GNAT1/HRH3/GAL/AKR1B10/GALR1/RGS20/NPY/AKR1C3/NMU/AGT/KNG1/HTR1B/TAS2R8/CNR2/SSTR5/TAS2R30/CHRM2/RGS22/GPR17
REACTOME_SIGNALING_BY_NUCLEAR_RECEPTORS	REACTOME_SIGNALING_BY_NUCLEAR_RECEPTORS	21	0.268848	1.45776	0.0684932	0.116207	0.053466	2593	tags=95%, list=66%, signal=32%	PCK1/GNG4/CRABP1/UGT1A3/EREG/AKR1C3/ANGPTL3/FOSB/PGR/H4C5/RXRG/H4C13/TFF1/H4C2/ERBB4/H2AC4/H4C3/ADH1A/H3C11/H2BC3
REACTOME_SIGNALING_BY_GPCR	REACTOME_SIGNALING_BY_GPCR	96	0.177849	1.84264	0.0769231	0.12906	0.0593792	518	tags=29%, list=13%, signal=26%	NTS/TAC1/F2/CGA/GNG4/CALCA/CALCB/APOC3/GNAT1/GIP/NTSR1/FZD10/TACR3/HRH3/PRLHR/GAL/GAST/AKR1B10/GALR1/RGS20/HTR2C/NPY/AKR1C3/WNT16/OR4C6/NMU/OR1F1/PTH2R
WP_MIRNAS_INVOLVED_IN_DNA_DAMAGE_RESPONSE	WP_MIRNAS_INVOLVED_IN_DNA_DAMAGE_RESPONSE	12	0.334275	1.39179	0.0790698	0.131204	0.0603656	2603	tags=100%, list=67%, signal=33%	MIR222/MIR27A/MIR181B1/MIR27B/MIRLET7A1/MIR23B/MIR374B/MIR23A/MIR34B/MIR34C/MIR421/MIRLET7F1
NABA_MATRISOME_ASSOCIATED	NABA_MATRISOME_ASSOCIATED	74	0.143622	1.44582	0.0909091	0.149209	0.0686499	679	tags=35%, list=17%, signal=30%	F2/MMP26/CLEC2L/SERPINB12/FGF21/CLEC2A/TCHHL1/S100A2/FGF5/F7/FGF12/ISM2/CTSV/INHBE/EREG/WNT16/AGT/PI3/CSH2/CBLN2/FST/MUC2/AMBP/KNG1/MUCL1/C1QL1
WP_CILIOPATHIES	WP_CILIOPATHIES	11	0.349088	1.40279	0.0978723	0.158911	0.0731135	2545	tags=100%, list=65%, signal=35%	NEK2/RSPH4A/DRC1/RSPH1/NME9/DNAH6/HYDIN/CFAP52/DNAI1/DNAAF1/DNAI2
REACTOME_METABOLISM_OF_CARBOHYDRATES	REACTOME_METABOLISM_OF_CARBOHYDRATES	10	0.356527	1.36282	0.108	0.173489	0.0798208	1923	tags=90%, list=49%, signal=46%	G6PC/PCK1/NDST4/HMMR/CHST9/OGN/CHST5/HPSE2/B3GALT5
NABA_MATRISOME	NABA_MATRISOME	102	0.163128	1.76837	0.125	0.198684	0.0914127	2648	tags=91%, list=68%, signal=30%	COL2A1/F2/IGFBP1/MMP26/FGA/CLEC2L/SERPINB12/FGF21/CLEC2A/TCHHL1/RSPO3/S100A2/FGF5/F7/FGF12/AMELY/FGB/ISM2/CTSV/INHBE/EREG/COCH/WNT16/AGT/PI3/CSH2/CBLN2/FGL1/FST/MUC2/COL26A1/AMBP/KNG1/MUCL1/C1QL1/ABI3BP/ANGPTL3/SFRP5/CTSG/HMCN1/MFAP4/SERPINB10/PRSS2/OGN/SLIT3/LGALS9B/SERPINI2/COL6A6/GRIFIN/RSPO1/FREM3/CCL14/SHH/INSL6/COL19A1/ITIH5/S100G/C1QTNF7/VWA3B/CLEC4F/HPSE2/IL5/CLEC19A/CCL16/DMBT1/TNXB/LGAL…
NABA_ECM_GLYCOPROTEINS	NABA_ECM_GLYCOPROTEINS	22	0.243519	1.34481	0.128788	0.202573	0.0932018	2423	tags=91%, list=62%, signal=35%	IGFBP1/FGA/RSPO3/AMELY/FGB/COCH/FGL1/ABI3BP/HMCN1/MFAP4/SLIT3/RSPO1/VWA3B/DMBT1/TNXB/TNR/VWA3A/LGI3/VWA5B1/RSPO2
KEGG_METABOLISM_OF_XENOBIOTICS_BY_CYTOCHROME_P450	KEGG_METABOLISM_OF_XENOBIOTICS_BY_CYTOCHROME_P450	17	0.272283	1.34116	0.130682	0.203433	0.0935974	2534	tags=94%, list=65%, signal=33%	UGT1A3/UGT1A6/AKR1C3/UGT2B4/CYP2B6/CYP3A7/CYP2F1/UGT1A8/CYP2C19/ADH1B/UGT2A3/UGT1A9/ADH1A/CYP2C9/CYP3A5/UGT2B15
REACTOME_METABOLISM_OF_LIPIDS	REACTOME_METABOLISM_OF_LIPIDS	29	0.198119	1.3027	0.134454	0.207169	0.0953163	2140	tags=83%, list=55%, signal=38%	CGA/PNPLA5/AKR1B15/CYP4F3/ELOVL4/TXNRD1/AKR1C3/ETNPPL/AGT/CYP24A1/PLA2G4F/ACOXL/HSD17B2/GK3P/PTPN13/PIK3C2G/HPGD/HSD17B13/MOGAT2/SLC10A1/CYP2C19/CYP4B1/ACSM6/UGT1A9
REACTOME_ANTIMICROBIAL_PEPTIDES	REACTOME_ANTIMICROBIAL_PEPTIDES	15	0.276995	1.30235	0.147368	0.224774	0.103416	1053	tags=53%, list=27%, signal=39%	DEFA5/DEFA6/PI3/SEMG1/RNASE8/CTSG/PRSS2/EPPIN
REACTOME_PHASE_II_CONJUGATION_OF_COMPOUNDS	REACTOME_PHASE_II_CONJUGATION_OF_COMPOUNDS	14	0.278391	1.26867	0.171875	0.259531	0.119408	566	tags=43%, list=14%, signal=37%	UGT1A3/UGT3A1/GLYATL3/UGT1A6/GCLC/UGT2B4
KEGG_DRUG_METABOLISM_CYTOCHROME_P450	KEGG_DRUG_METABOLISM_CYTOCHROME_P450	15	0.266135	1.25129	0.194737	0.291141	0.133951	2869	tags=100%, list=73%, signal=27%	UGT1A3/UGT1A6/UGT2B4/CYP2B6/CYP3A7/UGT1A8/CYP2C19/ADH1B/UGT2A3/UGT1A9/ADH1A/CYP2C9/CYP3A5/UGT2B15/UGT1A10
